# Supplementary material for: Diterpenoids from Blumea balsamifera and Their Anti-Inflammatory Activities
Source: MDPI journal article supplement (doi:10.3390/molecules27092890), 2022-04-30
Supplement: s1 [file s1]

## Supplementary Materials

# Diterpenoids from *Blumea balsamifera* and Their Anti-Inflammatory Activities

Xiao-Ling Huang <sup>1</sup>, Dai-Wei Wang <sup>2</sup>, Ying-Qian Liu <sup>1,\*</sup> and Yong-Xian Cheng <sup>1,2,3,\*</sup>

<sup>1</sup> School of Pharmacy, Lanzhou University, Lanzhou 730000, China; [huangxl19@lzu.edu.cn](mailto:huangxl19@lzu.edu.cn) (X.-L. H.); [yqliu@lzu.edu.cn](mailto:yqliu@lzu.edu.cn) (Y.-Q. L.)

<sup>2</sup> Institute for Inheritance-Based Innovation of Chinese Medicine, School of Pharmaceutical Sciences, Health Science Center, Shenzhen University, Shenzhen 518060, China; [dweiwang@foxmail.com](mailto:dweiwang@foxmail.com) (D.-W. W.); [yxcheng@szu.edu.cn](mailto:yxcheng@szu.edu.cn) (Y.-X. C.)

<sup>3</sup> Guangdong Key Laboratory of Functional Substances in Medicinal Edible Resources and Healthcare Products, School of Life Sciences and Food Engineering, Hanshan Normal University, Chaozhou 521041, China

\* Correspondence: [yqliu@lzu.edu.cn](mailto:yqliu@lzu.edu.cn) (Y.-Q. L.); [yxcheng@szu.edu.cn](mailto:yxcheng@szu.edu.cn) (Y.-X. C.)

## Contents

|                                                                                                                                                                                                                                          |    |
|------------------------------------------------------------------------------------------------------------------------------------------------------------------------------------------------------------------------------------------|----|
| Table S1. <sup>1</sup> H (600 MHz) and <sup>13</sup> C NMR (150 MHz) Data of 6 in pyridine- <i>d</i> <sub>5</sub> (δ in ppm, <i>J</i> in Hz) .....                                                                                       | 5  |
| Figure S1. Optimized geometries of predominant conformers for (4 <i>R</i> ,5 <i>S</i> ,6 <i>R</i> ,10 <i>R</i> ,13 <i>R</i> )-2 at the B3LYP/6-31G(d,p) level. ....                                                                      | 6  |
| Figure S2. Optimized geometries of predominant conformers for (4 <i>S</i> ,7 <i>R</i> ,9 <i>S</i> ,13 <i>R</i> )-3 at the B3LYP/6-31G(d,p) level.....                                                                                    | 6  |
| Figure S3. Optimized geometries of predominant conformers for (9 <i>R</i> ,10 <i>S</i> ,13 <i>S</i> )-5 at the B3LYP/6-31G(d,p) level.....                                                                                               | 6  |
| Figure S4. Optimized geometries of predominant conformers for (4 <i>R</i> ,5 <i>S</i> ,10 <i>S</i> )-6 at the B3LYP/6-31G(d,p) level.....                                                                                                | 7  |
| Table S2. Energy analysis for conformers of (4 <i>R</i> ,5 <i>S</i> ,6 <i>R</i> ,10 <i>R</i> ,13 <i>R</i> )-2 for the calculations at the B3LYP/6-31G(d,p) level in MeOH.....                                                            | 7  |
| Table S3. Energy analysis for conformers of (4 <i>S</i> ,7 <i>R</i> ,9 <i>S</i> ,13 <i>R</i> )-3 for the calculations at the B3LYP/6-31G(d,p) level in MeOH.....                                                                         | 7  |
| Table S4. Energy analysis for conformers of (9 <i>R</i> ,10 <i>S</i> ,13 <i>S</i> )-5 for the calculations at the B3LYP/6-31G(d,p) level in MeOH.....                                                                                    | 8  |
| Table S5. Energy analysis for conformers of (4 <i>R</i> ,5 <i>S</i> ,10 <i>S</i> )-6 for the calculations at the B3LYP/6-31G(d,p) level in MeOH.....                                                                                     | 8  |
| Table S6. The Cartesian coordinates of the lowest energy conformers for (4 <i>R</i> ,5 <i>S</i> ,6 <i>R</i> ,10 <i>R</i> ,13 <i>R</i> )-2.....                                                                                           | 8  |
| Table S7. The Cartesian coordinates of the lowest energy conformers for (4 <i>S</i> ,7 <i>R</i> ,9 <i>S</i> ,13 <i>R</i> )-3                                                                                                             | 12 |
| Table S8. The Cartesian coordinates of the lowest energy conformers for (9 <i>R</i> ,10 <i>S</i> ,13 <i>S</i> )-5 ...                                                                                                                    | 15 |
| Table S9. The Cartesian coordinates of the lowest energy conformers for (4 <i>R</i> ,5 <i>S</i> ,10 <i>S</i> )-6 .....                                                                                                                   | 17 |
| Figure S5. Regression analysis of experimental versus calculated <sup>13</sup> C NMR chemical shifts of (9 <i>R</i> ,10 <i>S</i> ,13 <i>S</i> )-5 and (9 <i>S</i> ,10 <i>S</i> ,13 <i>S</i> )-5 at the mPW1PW91/6-311+G(d,p) level. .... | 23 |
| Figure S6. DP4+ results of candidate (9 <i>R</i> ,10 <i>S</i> ,13 <i>S</i> )-5 (Isomer 1) and (9 <i>S</i> ,10 <i>S</i> ,13 <i>S</i> )-5 (Isomer 2). ....                                                                                 | 23 |
| Figure S7. <sup>1</sup> H NMR (600 MHz) spectrum of 1 in CDCl <sub>3</sub> .....                                                                                                                                                         | 24 |
| Figure S8. <sup>13</sup> C NMR and DEPT (150 MHz) spectra of 1 in CDCl <sub>3</sub> . ....                                                                                                                                               | 24 |
| Figure S9. <sup>1</sup> H- <sup>1</sup> H COSY (600 MHz) spectrum of 1 in CDCl <sub>3</sub> . ....                                                                                                                                       | 25 |
| Figure S10. Enlarged <sup>1</sup> H- <sup>1</sup> H COSY (600 MHz) spectrum of 1 in CDCl <sub>3</sub> . ....                                                                                                                             | 25 |
| Figure S11. HSQC (600 MHz) spectrum of 1 in CDCl <sub>3</sub> . ....                                                                                                                                                                     | 26 |
| Figure S12. Enlarged HSQC (600 MHz) spectrum of 1 in CDCl <sub>3</sub> .....                                                                                                                                                             | 26 |
| Figure S14. Enlarged HMBC (600 MHz) spectrum of 1 in CDCl <sub>3</sub> .....                                                                                                                                                             | 27 |
| Figure S15. ROESY (600 MHz) spectrum of 1 in CDCl <sub>3</sub> .....                                                                                                                                                                     | 28 |
| Figure S16. Enlarged ROESY (600 MHz) spectrum of 1 in CDCl <sub>3</sub> . ....                                                                                                                                                           | 28 |
| Figure S17. HRESIMS of 1. ....                                                                                                                                                                                                           | 29 |
| Figure S18. <sup>1</sup> H NMR (600 MHz) spectrum of 2 in CDCl <sub>3</sub> .....                                                                                                                                                        | 29 |
| Figure S19. <sup>13</sup> C NMR and DEPT (150 MHz) spectra of 2 in CDCl <sub>3</sub> . ....                                                                                                                                              | 30 |
| Figure S20. <sup>1</sup> H- <sup>1</sup> H COSY (600 MHz) spectrum of 2 in CDCl <sub>3</sub> . ....                                                                                                                                      | 30 |

|                                                                                                    |    |
|----------------------------------------------------------------------------------------------------|----|
| Figure S21. Enlarged $^1\text{H}$ - $^1\text{H}$ COSY (600 MHz) spectrum of 2 in $\text{CDCl}_3$ . | 31 |
| Figure S22. HSQC (600 MHz) spectrum of 2 in $\text{CDCl}_3$ .                                      | 31 |
| Figure S23. Enlarged HSQC (600 MHz) spectrum of 2 in $\text{CDCl}_3$ .                             | 32 |
| Figure S24. HMBC (600 MHz) spectrum of 2 in $\text{CDCl}_3$ .                                      | 32 |
| Figure S25. Enlarged HMBC (600 MHz) spectrum of 2 in $\text{CDCl}_3$ .                             | 33 |
| Figure S26. ROESY (600 MHz) spectrum of 2 in $\text{CDCl}_3$ .                                     | 33 |
| Figure S27. Enlarged ROESY (600 MHz) spectrum of 2 in $\text{CDCl}_3$ .                            | 34 |
| Figure S28. HRESIMS of 2.                                                                          | 34 |
| Figure S29. $^1\text{H}$ NMR (600 MHz) spectrum of 3 in $\text{CDCl}_3$ .                          | 35 |
| Figure S30. $^{13}\text{C}$ NMR and DEPT (150 MHz) spectra of 3 in $\text{CDCl}_3$ .               | 35 |
| Figure S31. $^1\text{H}$ - $^1\text{H}$ COSY (600 MHz) spectrum of 3 in $\text{CDCl}_3$ .          | 36 |
| Figure S32. HSQC (600 MHz) spectrum of 3 in $\text{CDCl}_3$ .                                      | 36 |
| Figure S33. Enlarged HSQC (600 MHz) spectrum of 3 in $\text{CDCl}_3$ .                             | 37 |
| Figure S34. HMBC (600 MHz) spectrum of 3 in $\text{CDCl}_3$ .                                      | 37 |
| Figure S35. Enlarged HMBC (600 MHz) spectrum of 3 in $\text{CDCl}_3$ .                             | 38 |
| Figure S36. ROESY (600 MHz) spectrum of 3 in $\text{CDCl}_3$ .                                     | 38 |
| Figure S37. Enlarged ROESY (600 MHz) spectrum of 3 in $\text{CDCl}_3$ .                            | 39 |
| Figure S38. HRESIMS of 3.                                                                          | 39 |
| Figure S39. $^1\text{H}$ NMR (600 MHz) spectrum of 4 in $\text{CDCl}_3$ .                          | 40 |
| Figure S40. $^{13}\text{C}$ NMR and DEPT (150 MHz) spectra of 4 in $\text{CDCl}_3$ .               | 40 |
| Figure S41. $^1\text{H}$ - $^1\text{H}$ COSY (600 MHz) spectrum of 4 in $\text{CDCl}_3$ .          | 41 |
| Figure S42. Enlarged $^1\text{H}$ - $^1\text{H}$ COSY (600 MHz) spectrum of 4 in $\text{CDCl}_3$ . | 41 |
| Figure S43. HSQC (600 MHz) spectrum of 4 in $\text{CDCl}_3$ .                                      | 42 |
| Figure S44. Enlarged HSQC (600 MHz) spectrum of 4 in $\text{CDCl}_3$ .                             | 42 |
| Figure S45. HMBC (600 MHz) spectrum of 4 in $\text{CDCl}_3$ .                                      | 43 |
| Figure S46. Enlarged HMBC (600 MHz) spectrum of 4 in $\text{CDCl}_3$ .                             | 43 |
| Figure S47. ROESY (600 MHz) spectrum of 4 in $\text{CDCl}_3$ .                                     | 44 |
| Figure S48. Enlarged ROESY (600 MHz) spectrum of 4 in $\text{CDCl}_3$ .                            | 44 |
| Figure S49. HRESIMS of 4.                                                                          | 45 |
| Figure S50. $^1\text{H}$ NMR (600 MHz) spectrum of 5 in $\text{CDCl}_3$ .                          | 45 |
| Figure S51. $^{13}\text{C}$ NMR and DEPT (150 MHz) spectra of 5 in $\text{CDCl}_3$ .               | 46 |
| Figure S52. $^1\text{H}$ - $^1\text{H}$ COSY (600 MHz) spectrum of 5 in $\text{CDCl}_3$ .          | 46 |
| Figure S53. Enlarged $^1\text{H}$ - $^1\text{H}$ COSY (600 MHz) spectrum of 5 in $\text{CDCl}_3$ . | 47 |
| Figure S54. HSQC (600 MHz) spectrum of 5 in $\text{CDCl}_3$ .                                      | 47 |
| Figure S55. Enlarged HSQC (600 MHz) spectrum of 5 in $\text{CDCl}_3$ .                             | 48 |
| Figure S56. HMBC (600 MHz) spectrum of 5 in $\text{CDCl}_3$ .                                      | 48 |
| Figure S57. Enlarged HMBC (600 MHz) spectrum of 5 in $\text{CDCl}_3$ .                             | 49 |
| Figure S58. ROESY (600 MHz) spectrum of 5 in $\text{CDCl}_3$ .                                     | 49 |

|                                                                                                          |    |
|----------------------------------------------------------------------------------------------------------|----|
| Figure S59. NOE irradiation spectrum (freq: 0.94 ppm) of compound 5 in CDCl <sub>3</sub> .....           | 50 |
| Figure S60. NOE irradiation spectrum (freq: 1.23 ppm) of compound 5 in CDCl <sub>3</sub> .....           | 50 |
| Figure S61. HRESIMS of 5. ....                                                                           | 51 |
| Figure S62. <sup>1</sup> H NMR (600 MHz) spectrum of 6 in CDCl <sub>3</sub> .....                        | 51 |
| Figure S63. <sup>13</sup> C NMR and DEPT (150 MHz) spectra of 6 in CDCl <sub>3</sub> .....               | 52 |
| Figure S64. <sup>1</sup> H- <sup>1</sup> H COSY (600 MHz) spectrum of 6 in CDCl <sub>3</sub> .....       | 52 |
| Figure S65. HSQC (600 MHz) spectrum of 6 in CDCl <sub>3</sub> .....                                      | 53 |
| Figure S66. Enlarged HSQC (600 MHz) spectrum of 6 in CDCl <sub>3</sub> .....                             | 53 |
| Figure S67. HMBC (600 MHz) spectrum of 6 in CDCl <sub>3</sub> .....                                      | 54 |
| Figure S68. Enlarged HMBC (600 MHz) spectrum of 6 in CDCl <sub>3</sub> .....                             | 54 |
| Figure S69. ROESY (600 MHz) spectrum of 6 in CDCl <sub>3</sub> .....                                     | 55 |
| Figure S70. Enlarged ROESY (600 MHz) spectrum of 6 in CDCl <sub>3</sub> .....                            | 55 |
| Figure S71. HRESIMS of 6. ....                                                                           | 56 |
| Figure S72. <sup>1</sup> H NMR (600 MHz) spectrum of 6 in pyridine- <i>d</i> <sub>5</sub> .....          | 56 |
| Figure S73. <sup>13</sup> C NMR and DEPT (150 MHz) spectra of 6 in pyridine- <i>d</i> <sub>5</sub> ..... | 57 |
| Figure S75. HSQC (600 MHz) spectrum of 6 in pyridine- <i>d</i> <sub>5</sub> .....                        | 58 |
| Figure S76. HMBC (600 MHz) spectrum of 6 in pyridine- <i>d</i> <sub>5</sub> .....                        | 58 |
| Figure S77. ROESY (600 MHz) spectrum of 6 in pyridine- <i>d</i> <sub>5</sub> .....                       | 59 |
| Figure S78. UV Spectra for compounds 1–6.....                                                            | 60 |
| Table S10. Crystal data and structure refinement for 1.....                                              | 60 |
| Table S11. Crystal data and structure refinement for 4.....                                              | 60 |



**Table S1.**  $^1\text{H}$  (600 MHz) and  $^{13}\text{C}$  NMR (150 MHz) Data of **6** in pyridine- $d_5$  ( $\delta$  in ppm,  $J$  in Hz)

| no     | $\delta_{\text{H}}$                      | $\delta_{\text{C}}$ |
|--------|------------------------------------------|---------------------|
| 1      | Ha: 1.76, overlap<br>Hb: 1.57, m         | 37.0, t             |
| 2      | Ha: 1.69, m<br>Hb: 1.63, m               | 20.1, t             |
| 3      | Ha: 1.84, m<br>Hb: 1.76, overlap         | 32.3, t             |
| 4      |                                          | 52.4, s             |
| 5      | 2.14, t-like (5.4)                       | 53.6, d             |
| 6      | 2.04, m                                  | 27.2, t             |
| 7      | 3.00, m                                  | 30.4, t             |
| 8      |                                          | 125.7, s            |
| 9      |                                          | 155.0, s            |
| 10     |                                          | 86.6, s             |
| 11     | 7.12, d (8.1)                            | 116.1, d            |
| 12     | 7.06, dd (8.1, 2.1)                      | 129.1, d            |
| 13     |                                          | 140.2, s            |
| 14     | 7.22, d (2.1)                            | 129.5, d            |
| 15     | 2.85, h (6.9)                            | 34.0, d             |
| 16     | 1.25, d (6.9)                            | 25.0, q             |
| 17     | 1.25, d (6.9)                            | 25.0, q             |
| 18     |                                          | 177.7, s            |
| 19     | Ha: 4.85, d (11.6)<br>Hb: 4.65, d (11.6) | 65.3, t             |
| 20     | 1.56, s                                  | 22.5, q             |
| 21     |                                          | 171.0, s            |
| 22     | 2.07, s                                  | 21.0, q             |
| 4-COOH | 11.3, brd                                |                     |

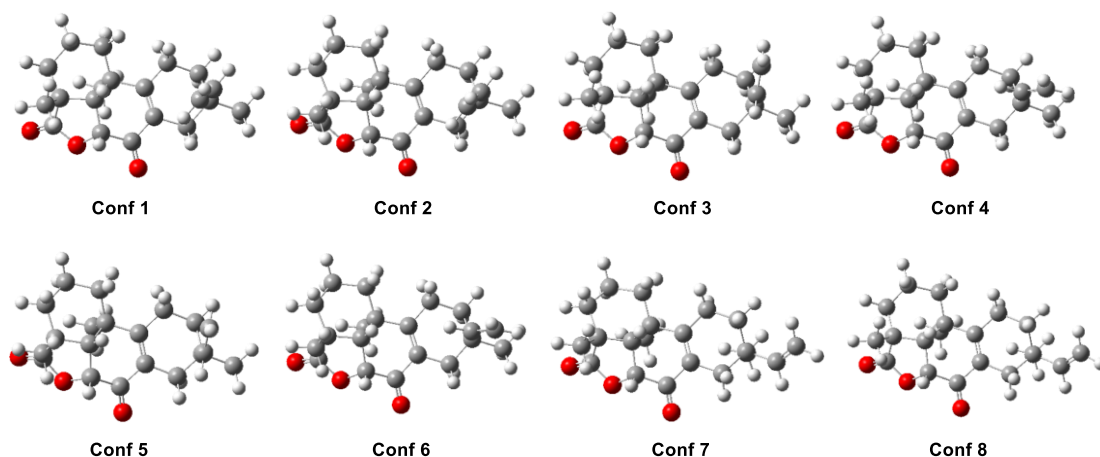

**Figure S1.** Optimized geometries of predominant conformers for (4*R*,5*S*,6*R*,10*R*,13*R*)-**2** at the B3LYP/6-31G(d,p) level.

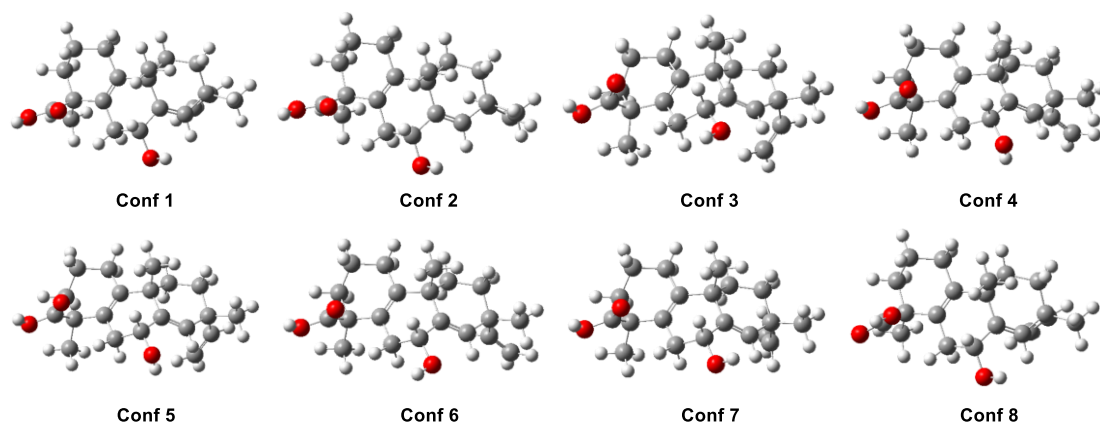

**Figure S2.** Optimized geometries of predominant conformers for (4*S*,7*R*,9*S*,13*R*)-**3** at the B3LYP/6-31G(d,p) level.

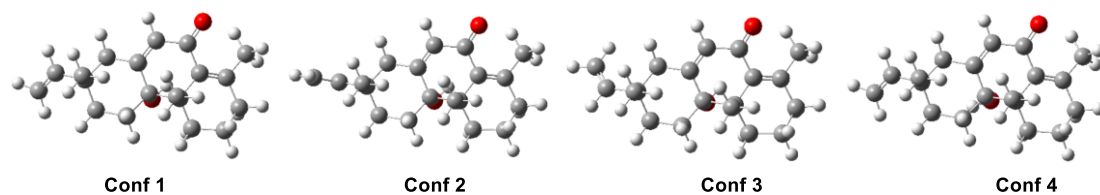

**Figure S3.** Optimized geometries of predominant conformers for (9*R*,10*S*,13*S*)-**5** at the B3LYP/6-31G(d,p) level.

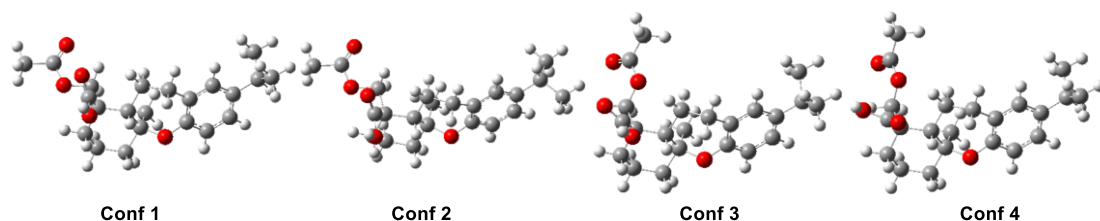

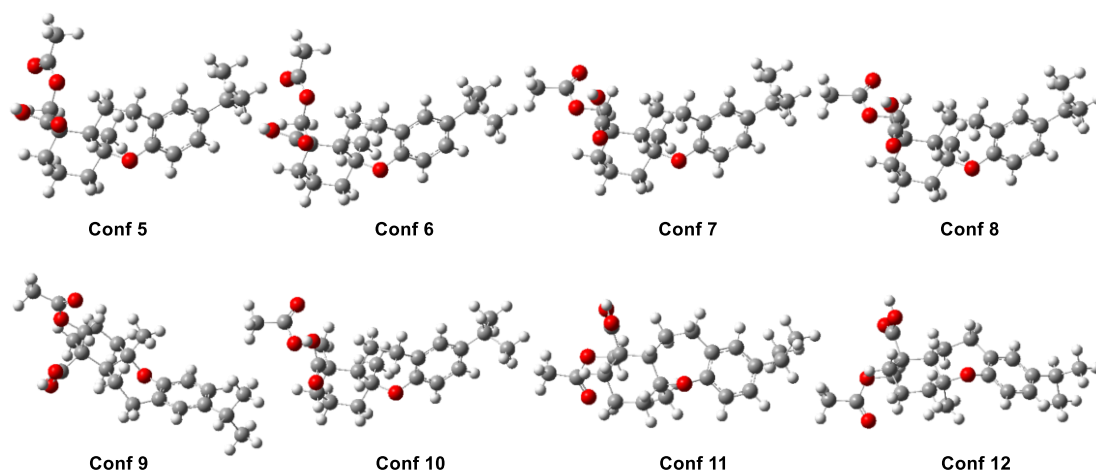

**Figure S4.** Optimized geometries of predominant conformers for (4*R*,5*S*,10*S*)-**6** at the B3LYP/6-31G(d,p) level.

**Table S2.** Energy analysis for conformers of (4*R*,5*S*,6*R*,10*R*,13*R*)-**2** for the calculations at the B3LYP/6-31G(d,p) level in MeOH

| <i>Conformers</i> | G (Hartree) | $\Delta G$<br>(Kcal/mol) | Population |
|-------------------|-------------|--------------------------|------------|
| Conf 1            | -1003.11287 | 0.00000                  | 39.95%     |
| Conf 2            | -1003.11212 | 0.47000                  | 18.07%     |
| Conf 3            | -1003.11149 | 0.86722                  | 9.24%      |
| Conf 4            | -1003.11146 | 0.88416                  | 8.98%      |
| Conf 5            | -1003.11087 | 1.25314                  | 4.81%      |
| Conf 6            | -1003.11085 | 1.26757                  | 4.70%      |
| Conf 7            | -1003.11122 | 1.03602                  | 6.95%      |
| Conf 8            | -1003.11127 | 1.00590                  | 7.31%      |

**Table S3.** Energy analysis for conformers of (4*S*,7*R*,9*S*,13*R*)-**3** for the calculations at the B3LYP/6-31G(d,p) level in MeOH

| <i>Conformers</i> | G (Hartree) | $\Delta G$<br>(Kcal/mol) | Population |
|-------------------|-------------|--------------------------|------------|
| Conf 1            | -1004.29231 | 0.20896                  | 25.63%     |
| Conf 2            | -1004.29059 | 1.28828                  | 4.14%      |
| Conf 3            | -1004.29149 | 0.72164                  | 10.78%     |
| Conf 4            | -1004.29041 | 1.39809                  | 3.44%      |
| Conf 5            | -1004.29183 | 0.51079                  | 15.39%     |

|        |             |         |        |
|--------|-------------|---------|--------|
| Conf 6 | -1004.28981 | 1.77523 | 1.82%  |
| Conf 7 | -1004.29004 | 1.62964 | 2.33%  |
| Conf 8 | -1004.29264 | 0.00000 | 36.47% |

**Table S4.** Energy analysis for conformers of (9*R*,10*S*,13*S*)-**5** for the calculations at the B3LY P/6-31G(d,p) level in MeOH

| <i>Conformers</i> | G (Hartree) | $\Delta G$<br>(Kcal/mol) | Population |
|-------------------|-------------|--------------------------|------------|
| Conf 1            | -889.77107  | 0.26104                  | 28.19%     |
| Conf 2            | -889.77149  | 0.00000                  | 43.80%     |
| Conf 3            | -889.77116  | 0.20394                  | 31.04%     |
| Conf 4            | -889.76821  | 2.05635                  | 1.36%      |

**Table S5.** Energy analysis for conformers of (4*R*,5*S*,10*S*)-**6** for the calculations at the B3LYP/6-31G(d,p) level in MeOH

| <i>Conformers</i> | G (Hartree) | $\Delta G$<br>(Kcal/mol) | Population |
|-------------------|-------------|--------------------------|------------|
| Conf 1            | -1232.19570 | -0.00941                 | 14.60%     |
| Conf 2            | -1232.19569 | -0.00063                 | 14.39%     |
| Conf 3            | -1232.19469 | 0.62312                  | 5.02%      |
| Conf 4            | -1232.19398 | 1.07179                  | 2.35%      |
| Conf 5            | -1232.19428 | 0.88102                  | 3.25%      |
| Conf 6            | -1232.19437 | 0.82580                  | 3.56%      |
| Conf 7            | -1232.19570 | -0.01004                 | 14.62%     |
| Conf 8            | -1232.19568 | 0.00000                  | 14.37%     |
| Conf 9            | -1232.19538 | 0.19327                  | 10.37%     |
| Conf 10           | -1232.19538 | 0.19327                  | 10.37%     |
| Conf 11           | -1232.19433 | 0.84714                  | 3.44%      |
| Conf 12           | -1232.19439 | 0.81074                  | 3.66%      |

**Table S6.** The Cartesian coordinates of the lowest energy conformers for (4*R*,5*S*,6*R*,10*R*,13*R*)-

**2**

| Conf 1 | X axis(Å) | Y axis(Å) | Z axis(Å) | Conf 2 | X axis(Å) | Y axis(Å) | Z axis(Å) |
|--------|-----------|-----------|-----------|--------|-----------|-----------|-----------|
| C      | -2.3234   | 2.6926    | 0.3155    | C      | -2.5138   | 2.5553    | -0.2083   |
| C      | -3.3295   | 1.5702    | 0.0767    | C      | -3.2735   | 1.5892    | 0.6967    |
| C      | -2.8304   | 0.2206    | 0.6166    | C      | -2.7419   | 0.15      | 0.8034    |

|               |                  |                  |                  |               |                  |                  |                  |
|---------------|------------------|------------------|------------------|---------------|------------------|------------------|------------------|
| C             | -1.3038          | 0.0954           | 0.599            | C             | -1.231           | 0.0257           | 0.6291           |
| C             | -0.5969          | 0.9227           | -0.5118          | C             | -0.603           | 0.9124           | -0.4943          |
| C             | -0.9056          | 2.4149           | -0.2099          | C             | -0.9968          | 2.367            | -0.1584          |
| C             | -1.1036          | -1.3966          | 0.4532           | C             | -1.0689          | -1.446           | 0.3153           |
| C             | 0.2983           | -1.7851          | -0.0108          | C             | 0.3249           | -1.7825          | -0.2275          |
| C             | 1.3085           | -0.6993          | -0.2226          | C             | 1.3299           | -0.6724          | -0.3344          |
| C             | 0.8984           | 0.5672           | -0.4564          | C             | 0.8986           | 0.6034           | -0.4578          |
| C             | 2.7523           | -1.1371          | -0.2198          | C             | 2.78             | -1.0797          | -0.336           |
| C             | 3.7658           | 0.0317           | -0.0955          | C             | 3.7537           | 0.093            | -0.0387          |
| C             | 3.3197           | 1.1394           | -1.075           | C             | 3.3219           | 1.2915           | -0.9137          |
| C             | 1.9066           | 1.6547           | -0.7737          | C             | 1.8797           | 1.7398           | -0.64            |
| C             | 3.9165           | 0.6258           | 1.3062           | C             | 3.824            | 0.5356           | 1.4241           |
| C             | 3.3341           | 0.2244           | 2.4445           | C             | 3.2157           | -0.0101          | 2.4863           |
| C             | 5.1578           | -0.4827          | -0.5134          | C             | 5.1769           | -0.3405          | -0.4426          |
| C             | -3.2191          | -0.955           | -0.2615          | C             | -3.1959          | -0.8338          | -0.2591          |
| O             | -4.3058          | -1.1195          | -0.7907          | O             | -4.2848          | -0.8492          | -0.8069          |
| O             | -2.1728          | -1.831           | -0.3754          | O             | -2.1923          | -1.7447          | -0.5075          |
| C             | -3.4026          | -0.0299          | 2.0223           | C             | -3.2333          | -0.4284          | 2.1514           |
| C             | -1.0231          | 0.6056           | -1.9703          | C             | -1.0436          | 0.6154           | -1.9567          |
| O             | 0.6191           | -2.9607          | -0.1828          | O             | 0.6423           | -2.9295          | -0.5383          |
| H             | -0.8843          | 0.4173           | 1.5649           | H             | -0.7259          | 0.2638           | 1.5777           |
| H             | -1.2255          | -1.887           | 1.4286           | H             | -1.1595          | -2.0453          | 1.2308           |
| H             | -2.6981          | 3.6249           | -0.1235          | H             | -2.8793          | 2.4583           | -1.236           |
| H             | -2.2618          | 2.8764           | 1.3963           | H             | -2.7555          | 3.5842           | 0.0863           |
| H             | -3.5724          | 1.5166           | -0.9892          | H             | -4.3298          | 1.5841           | 0.3997           |
| H             | -4.2793          | 1.8442           | 0.5544           | H             | -3.2506          | 2.0386           | 1.6998           |
| H             | -0.2096          | 2.8055           | 0.5436           | H             | -0.6294          | 2.641            | 0.8393           |
| H             | -0.7371          | 3.0226           | -1.1086          | H             | -0.5413          | 3.0731           | -0.863           |
| H             | 2.9273           | -1.8682          | 0.5797           | H             | 2.9488           | -1.8949          | 0.3789           |
| H             | 2.9279           | -1.6739          | -1.1629          | H             | 2.999            | -1.4975          | -1.3286          |
| H             | 3.3375           | 0.7474           | -2.1018          | H             | 3.4038           | 1.0135           | -1.9742          |
| H             | 4.0205           | 1.9845           | -1.0615          | H             | 3.996            | 2.1468           | -0.7735          |
| H             | 1.9562           | 2.3491           | 0.0732           | H             | 1.8604           | 2.3672           | 0.2593           |
| H             | 1.5712           | 2.2328           | -1.6426          | H             | 1.5668           | 2.3704           | -1.4803          |
| H             | 4.593            | 1.4796           | 1.3751           | H             | 4.4613           | 1.4012           | 1.6141           |
| H             | 3.5413           | 0.7422           | 3.3772           | H             | 3.3649           | 0.4097           | 3.4775           |
| H             | 2.655            | -0.6186          | 2.4976           | H             | 2.5728           | -0.88            | 2.419            |
| H             | 5.1458           | -0.8777          | -1.5359          | H             | 5.2215           | -0.6238          | -1.5005          |
| H             | 5.9087           | 0.3159           | -0.4818          | H             | 5.9026           | 0.4675           | -0.2908          |
| H             | 5.4982           | -1.2875          | 0.1488           | H             | 5.5104           | -1.2035          | 0.1458           |
| H             | -3.064           | 0.7371           | 2.7273           | H             | -2.751           | 0.0781           | 2.9948           |
| H             | -4.4988          | -0.0147          | 2.007            | H             | -4.3174          | -0.2973          | 2.2545           |
| H             | -3.11            | -1.0065          | 2.4228           | H             | -3.0434          | -1.502           | 2.2532           |
| H             | -0.85            | -0.4421          | -2.2392          | H             | -0.7288          | -0.3733          | -2.3078          |
| H             | -2.0719          | 0.8177           | -2.176           | H             | -2.1248          | 0.6664           | -2.1016          |
| H             | -0.4463          | 1.2088           | -2.6832          | H             | -0.5975          | 1.3441           | -2.6457          |
| <b>Conf 3</b> | <b>X axis(Å)</b> | <b>Y axis(Å)</b> | <b>Z axis(Å)</b> | <b>Conf 4</b> | <b>X axis(Å)</b> | <b>Y axis(Å)</b> | <b>Z axis(Å)</b> |
| C             | -2.2486          | 2.7462           | 0.0894           | C             | -2.3591          | 2.7192           | 0.2716           |
| C             | -3.2961          | 1.6451           | -0.0489          | C             | -3.3803          | 1.6024           | 0.0745           |
| C             | -2.8473          | 0.3315           | 0.6107           | C             | -2.8944          | 0.265            | 0.6552           |
| C             | -1.3268          | 0.1465           | 0.6071           | C             | -1.3696          | 0.1205           | 0.6331           |
| C             | -0.5894          | 0.8455           | -0.5701          | C             | -0.659           | 0.9024           | -0.5081          |
| C             | -0.8409          | 2.369            | -0.3997          | C             | -0.9484          | 2.4075           | -0.2537          |
| C             | -1.1841          | -1.3591          | 0.5932           | C             | -1.1883          | -1.3777          | 0.5348           |
| C             | 0.1993           | -1.8407          | 0.1628           | C             | 0.2056           | -1.7976          | 0.0741           |
| C             | 1.2518           | -0.8177          | -0.1388          | C             | 1.2296           | -0.731           | -0.1748          |
| C             | 0.8918           | 0.4388           | -0.4808          | C             | 0.8331           | 0.5316           | -0.4493          |
| C             | 2.6746           | -1.3128          | -0.1058          | C             | 2.6659           | -1.1942          | -0.1696          |
| C             | 3.7364           | -0.1817          | -0.0444          | C             | 3.714            | -0.0491          | -0.1425          |
| C             | 3.3477           | 0.8785           | -1.0995          | C             | 3.2531           | 1.0572           | -1.1173          |
| C             | 1.9399           | 1.4537           | -0.892           | C             | 1.85             | 1.5958           | -0.813           |

|               |                  |                  |                  |               |                  |                  |                  |
|---------------|------------------|------------------|------------------|---------------|------------------|------------------|------------------|
| C             | 3.8591           | 0.3384           | 1.3891           | C             | 3.8253           | 0.5147           | 1.2783           |
| C             | 3.9973           | 1.6077           | 1.796            | C             | 4.9282           | 0.6399           | 2.0299           |
| C             | 5.11             | -0.7761          | -0.4153          | C             | 5.0572           | -0.6155          | -0.6531          |
| C             | -3.283           | -0.9018          | -0.1597          | C             | -3.3028          | -0.9336          | -0.1821          |
| O             | -4.3766          | -1.0707          | -0.6732          | O             | -4.3944          | -1.1014          | -0.6998          |
| O             | -2.2715          | -1.8238          | -0.1943          | O             | -2.2678          | -1.8254          | -0.2732          |
| C             | -3.4261          | 0.2296           | 2.0322           | C             | -3.4612          | 0.0672           | 2.0714           |
| C             | -1.0299          | 0.4191           | -1.9962          | C             | -1.0978          | 0.5427           | -1.9531          |
| O             | 0.4719           | -3.0385          | 0.0869           | O             | 0.5092           | -2.9817          | -0.0681          |
| H             | -0.894           | 0.5355           | 1.5419           | H             | -0.9404          | 0.4686           | 1.5856           |
| H             | -1.321           | -1.7572          | 1.6079           | H             | -1.3097          | -1.8352          | 1.5261           |
| H             | -2.5873          | 3.6468           | -0.4365          | H             | -2.7252          | 3.6419           | -0.1943          |
| H             | -2.1824          | 3.0278           | 1.1487           | H             | -2.288           | 2.9362           | 1.3456           |
| H             | -3.5429          | 1.5052           | -1.1059          | H             | -3.6299          | 1.5175           | -0.9877          |
| H             | -4.2342          | 1.9963           | 0.4006           | H             | -4.3239          | 1.9034           | 0.5483           |
| H             | -0.1341          | 2.7951           | 0.3239           | H             | -0.2424          | 2.8145           | 0.4816           |
| H             | -0.6435          | 2.8904           | -1.3454          | H             | -0.7793          | 2.983            | -1.1732          |
| H             | 2.8109           | -1.9914          | 0.7471           | H             | 2.8353           | -1.8582          | 0.6891           |
| H             | 2.8325           | -1.9189          | -1.0088          | H             | 2.8117           | -1.8067          | -1.0702          |
| H             | 3.3812           | 0.4169           | -2.097           | H             | 3.2511           | 0.6584           | -2.1417          |
| H             | 4.077            | 1.6977           | -1.1303          | H             | 3.9645           | 1.8935           | -1.1183          |
| H             | 1.9841           | 2.2408           | -0.1323          | H             | 1.9176           | 2.3175           | 0.0094           |
| H             | 1.6383           | 1.9381           | -1.8284          | H             | 1.5097           | 2.1508           | -1.6952          |
| H             | 3.8702           | -0.4287          | 2.1655           | H             | 2.8925           | 0.8474           | 1.7341           |
| H             | 4.0945           | 1.8374           | 2.8535           | H             | 4.8664           | 1.0558           | 3.0318           |
| H             | 4.0404           | 2.4452           | 1.1092           | H             | 5.9134           | 0.3413           | 1.6887           |
| H             | 5.1002           | -1.201           | -1.4257          | H             | 4.9553           | -1.0235          | -1.6658          |
| H             | 5.895            | -0.0109          | -0.3884          | H             | 5.8309           | 0.1598           | -0.6975          |
| H             | 5.4006           | -1.5771          | 0.275            | H             | 5.42             | -1.4268          | -0.0113          |
| H             | -3.0577          | 1.0434           | 2.6662           | H             | -3.1091          | 0.8524           | 2.7492           |
| H             | -4.521           | 0.2845           | 2.0139           | H             | -4.5572          | 0.0954           | 2.0617           |
| H             | -3.1696          | -0.7175          | 2.5189           | H             | -3.1781          | -0.8994          | 2.5017           |
| H             | -0.8975          | -0.654           | -2.1724          | H             | -0.9378          | -0.5151          | -2.1885          |
| H             | -2.07            | 0.6523           | -2.2217          | H             | -2.1454          | 0.7598           | -2.1593          |
| H             | -0.4316          | 0.9353           | -2.7579          | H             | -0.5188          | 1.1158           | -2.6887          |
| <b>Conf 5</b> | <b>X axis(Å)</b> | <b>Y axis(Å)</b> | <b>Z axis(Å)</b> | <b>Conf 6</b> | <b>X axis(Å)</b> | <b>Y axis(Å)</b> | <b>Z axis(Å)</b> |
| C             | 2.4434           | -2.5471          | -0.5119          | C             | 2.5548           | -2.5595          | -0.2851          |
| C             | 3.2328           | -1.7328          | 0.5096           | C             | 3.318            | -1.6494          | 0.6732           |
| C             | 2.7546           | -0.2996          | 0.7971           | C             | 2.8036           | -0.2104          | 0.8463           |
| C             | 1.2505           | -0.0971          | 0.6377           | C             | 1.2959           | -0.0582          | 0.6653           |
| C             | 0.5965           | -0.8107          | -0.5892          | C             | 0.6669           | -0.8802          | -0.5061          |
| C             | 0.9343           | -2.3098          | -0.4401          | C             | 1.0399           | -2.3546          | -0.2391          |
| C             | 1.1452           | 1.4075           | 0.5118           | C             | 1.1552           | 1.4291           | 0.4235           |
| C             | -0.2302          | 1.862            | 0.0097           | C             | -0.2289          | 1.8092           | -0.1151          |
| C             | -1.2764          | 0.8132           | -0.2358          | C             | -1.2486          | 0.7183           | -0.2821          |
| C             | -0.8933          | -0.4526          | -0.5154          | C             | -0.832           | -0.5548          | -0.4676          |
| C             | -2.7079          | 1.2741           | -0.2009          | C             | -2.6913          | 1.1519           | -0.2828          |
| C             | -3.7271          | 0.1171           | -0.0116          | C             | -3.7056          | -0.0118          | -0.1094          |
| C             | -3.351           | -1.0055          | -1.0067          | C             | -3.2554          | -1.1919          | -1.0004          |
| C             | -1.9132          | -1.5193          | -0.8411          | C             | -1.8231          | -1.6677          | -0.7232          |
| C             | -3.7681          | -0.302           | 1.4591           | C             | -3.7445          | -0.4503          | 1.3588           |
| C             | -3.8199          | -1.5431          | 1.9619           | C             | -4.81            | -0.517           | 2.1696           |
| C             | -5.135           | 0.641            | -0.3595          | C             | -5.083           | 0.4751           | -0.6109          |
| C             | 3.2519           | 0.7926           | -0.1316          | C             | 3.2797           | 0.8185           | -0.1624          |
| O             | 4.344            | 0.8357           | -0.6715          | O             | 4.3735           | 0.8464           | -0.6997          |
| O             | 2.2849           | 1.7651           | -0.2642          | O             | 2.2897           | 1.7532           | -0.374           |
| C             | 3.2587           | 0.0847           | 2.2081           | C             | 3.2897           | 0.2945           | 2.2253           |
| C             | 1.0567           | -0.3482          | -2.0019          | C             | 1.1248           | -0.5169          | -1.9481          |
| O             | -0.5005          | 3.0497           | -0.162           | O             | -0.527           | 2.9732           | -0.3783          |
| H             | 0.7312           | -0.4336          | 1.548            | H             | 0.7792           | -0.3365          | 1.5965           |
| H             | 1.2509           | 1.8834           | 1.4956           | H             | 1.2446           | 1.9818           | 1.368            |

|               |                  |                  |                  |               |                  |                  |                  |
|---------------|------------------|------------------|------------------|---------------|------------------|------------------|------------------|
| H             | 2.8185           | -2.3343          | -1.5185          | H             | 2.931            | -2.4163          | -1.3036          |
| H             | 2.6451           | -3.6134          | -0.3501          | H             | 2.7811           | -3.6048          | -0.0401          |
| H             | 4.2905           | -1.7301          | 0.2174           | H             | 4.3771           | -1.6434          | 0.3863           |
| H             | 3.1868           | -2.3044          | 1.4476           | H             | 3.28             | -2.1474          | 1.6526           |
| H             | 0.5518           | -2.6939          | 0.5147           | H             | 0.6597           | -2.6728          | 0.7405           |
| H             | 0.456            | -2.9031          | -1.2287          | H             | 0.5826           | -3.0193          | -0.9816          |
| H             | -2.8404          | 2.0159           | 0.5983           | H             | -2.8542          | 1.8937           | 0.5109           |
| H             | -2.9105          | 1.7986           | -1.1448          | H             | -2.8762          | 1.6679           | -1.2349          |
| H             | -4.0505          | -1.8483          | -0.9416          | H             | -3.9413          | -2.0425          | -0.8931          |
| H             | -3.4533          | -0.6182          | -2.0309          | H             | -3.3132          | -0.8874          | -2.0552          |
| H             | -1.8858          | -2.2796          | -0.0528          | H             | -1.826           | -2.3411          | 0.1424           |
| H             | -1.6345          | -2.0225          | -1.7747          | H             | -1.5021          | -2.2597          | -1.5882          |
| H             | -3.7915          | 0.519            | 2.1779           | H             | -2.7885          | -0.7371          | 1.797            |
| H             | -3.8647          | -1.6983          | 3.0364           | H             | -4.6976          | -0.8444          | 3.1995           |
| H             | -3.842           | -2.4307          | 1.3402           | H             | -5.813           | -0.2552          | 1.8509           |
| H             | -5.1835          | 0.9937           | -1.3962          | H             | -5.0331          | 0.7909           | -1.6598          |
| H             | -5.8914          | -0.1445          | -0.2438          | H             | -5.8371          | -0.3182          | -0.5513          |
| H             | -5.4226          | 1.4793           | 0.2863           | H             | -5.4406          | 1.3335           | -0.0305          |
| H             | 2.7532           | -0.5063          | 2.9799           | H             | 2.7935           | -0.2467          | 3.0386           |
| H             | 4.3367           | -0.0985          | 2.2953           | H             | 4.3711           | 0.1445           | 2.3311           |
| H             | 3.1075           | 1.1431           | 2.445            | H             | 3.1123           | 1.3641           | 2.3784           |
| H             | 0.7806           | 0.6878           | -2.2262          | H             | 0.825            | 0.4917           | -2.2526          |
| H             | 2.1362           | -0.4206          | -2.1505          | H             | 2.2066           | -0.5741          | -2.0858          |
| H             | 0.5885           | -0.9672          | -2.778           | H             | 0.6766           | -1.2052          | -2.6762          |
| <b>Conf 7</b> | <b>X axis(Å)</b> | <b>Y axis(Å)</b> | <b>Z axis(Å)</b> | <b>Conf 8</b> | <b>X axis(Å)</b> | <b>Y axis(Å)</b> | <b>Z axis(Å)</b> |
| C             | 2.6216           | 2.5516           | 0.2866           | C             | 2.5741           | 2.6747           | -0.2923          |
| C             | 3.5033           | 1.5883           | -0.5032          | C             | 3.4921           | 1.5215           | 0.101            |
| C             | 2.9874           | 0.1523           | -0.6964          | C             | 3.0393           | 0.1805           | -0.4973          |
| C             | 1.4666           | 0.0343           | -0.7554          | C             | 1.5249           | 0.0943           | -0.7147          |
| C             | 0.6779           | 0.9212           | 0.2586           | C             | 0.6775           | 0.9662           | 0.2523           |
| C             | 1.1297           | 2.3748           | 0.0013           | C             | 1.0761           | 2.4381           | -0.0397          |
| C             | 1.2513           | -1.4362          | -0.4714          | C             | 1.2621           | -1.3872          | -0.5735          |
| C             | -0.2064          | -1.7706          | -0.1318          | C             | -0.2009          | -1.7362          | -0.3148          |
| C             | -1.2194          | -0.6579          | -0.1641          | C             | -1.2094          | -0.6253          | -0.2578          |
| C             | -0.8024          | 0.6202           | -0.0134          | C             | -0.8044          | 0.6432           | -0.0203          |
| C             | -2.6658          | -1.0683          | -0.2756          | C             | -2.6559          | -1.0448          | -0.3717          |
| C             | -3.6776          | 0.0206           | 0.1725           | C             | -3.6716          | -0.024           | 0.2041           |
| C             | -3.2152          | 1.3758           | -0.4091          | C             | -3.2526          | 1.3827           | -0.2718          |
| C             | -1.7907          | 1.7636           | 0.0057           | C             | -1.8213          | 1.7593           | 0.1278           |
| C             | -5.0687          | -0.4027          | -0.2984          | C             | -5.0701          | -0.4333          | -0.2573          |
| C             | -5.9168          | 0.2772           | -1.0825          | C             | -5.9571          | 0.2954           | -0.9488          |
| C             | -3.7331          | 0.096            | 1.7149           | C             | -3.6758          | -0.085           | 1.748            |
| C             | 3.2711           | -0.8356          | 0.4196           | C             | 3.2573           | -0.9891          | 0.4457           |
| O             | 4.2637           | -0.8565          | 1.1268           | O             | 4.2479           | -1.1742          | 1.133            |
| O             | 2.2383           | -1.7425          | 0.5097           | O             | 2.1791           | -1.8314          | 0.4168           |
| C             | 3.6756           | -0.4245          | -1.9557          | C             | 3.8132           | -0.1073          | -1.795           |
| C             | 0.8832           | 0.6166           | 1.7718           | C             | 0.8664           | 0.6832           | 1.7669           |
| O             | -0.5589          | -2.9199          | 0.1288           | O             | -0.5634          | -2.9051          | -0.1836          |
| H             | 1.1138           | 0.2752           | -1.7698          | H             | 1.2701           | 0.4024           | -1.7408          |
| H             | 1.4727           | -2.0359          | -1.364           | H             | 1.5164           | -1.9024          | -1.5098          |
| H             | 2.8252           | 2.4417           | 1.3569           | H             | 2.7148           | 2.8755           | -1.3628          |
| H             | 2.912            | 3.5814           | 0.0434           | H             | 2.8901           | 3.5894           | 0.2236           |
| H             | 4.5041           | 1.5763           | -0.0534          | H             | 3.5702           | 1.4728           | 1.1916           |
| H             | 3.6305           | 2.0436           | -1.4958          | H             | 4.5124           | 1.7603           | -0.2271          |
| H             | 0.9268           | 2.6589           | -1.0397          | H             | 0.5537           | 2.8012           | -0.9342          |
| H             | 0.5711           | 3.0769           | 0.6326           | H             | 0.7453           | 3.0882           | 0.7809           |
| H             | -2.847           | -1.3373          | -1.3258          | H             | -2.8606          | -1.2157          | -1.4381          |
| H             | -2.8465          | -1.9778          | 0.3124           | H             | -2.8121          | -2.0085          | 0.1306           |
| H             | -3.2473          | 1.3318           | -1.5071          | H             | -3.9362          | 2.1481           | 0.1181           |
| H             | -3.8969          | 2.1829           | -0.1109          | H             | -3.322           | 1.4339           | -1.3679          |
| H             | -1.4597          | 2.5559           | -0.6751          | H             | -1.5401          | 2.6183           | -0.4895          |

|   |         |         |         |   |         |         |         |
|---|---------|---------|---------|---|---------|---------|---------|
| H | -1.8104 | 2.1959  | 1.0134  | H | -1.8157 | 2.1045  | 1.1686  |
| H | -5.401  | -1.3805 | 0.0563  | H | -5.3717 | -1.4458 | 0.0186  |
| H | -6.884  | -0.1462 | -1.3396 | H | -6.9246 | -0.1241 | -1.2113 |
| H | -5.6911 | 1.2576  | -1.4865 | H | -5.7637 | 1.3126  | -1.2702 |
| H | -2.7542 | 0.2986  | 2.1608  | H | -2.6864 | 0.0993  | 2.1784  |
| H | -4.4161 | 0.888   | 2.0447  | H | -4.3621 | 0.6599  | 2.1682  |
| H | -4.0894 | -0.8467 | 2.148   | H | -3.9992 | -1.0695 | 2.1075  |
| H | 3.332   | 0.0889  | -2.8606 | H | 3.6115  | 0.6592  | -2.5511 |
| H | 4.7636  | -0.3013 | -1.8909 | H | 4.8939  | -0.1247 | -1.611  |
| H | 3.4957  | -1.4962 | -2.0907 | H | 3.5546  | -1.0804 | -2.2261 |
| H | 0.5114  | -0.3703 | 2.0678  | H | 0.623   | -0.3513 | 2.0329  |
| H | 1.9289  | 0.6591  | 2.0836  | H | 1.8763  | 0.8739  | 2.1275  |
| H | 0.3398  | 1.3468  | 2.3852  | H | 0.2058  | 1.3228  | 2.3661  |

**Table S7.** The Cartesian coordinates of the lowest energy conformers for (4*S*,7*R*,9*S*,13*R*)-**3**

| Conf 1 | X axis(Å) | Y axis(Å) | Z axis(Å) | Conf 2 | X axis(Å) | Y axis(Å) | Z axis(Å) |
|--------|-----------|-----------|-----------|--------|-----------|-----------|-----------|
| C      | -2.6185   | -2.3917   | -0.0669   | C      | -2.6907   | -2.3831   | -0.1543   |
| C      | -3.0635   | -1.4779   | 1.0636    | C      | -3.1284   | -1.5395   | 1.0322    |
| C      | -2.7086   | -0.0005   | 0.7776    | C      | -2.7782   | -0.0469   | 0.8321    |
| C      | -1.2931   | 0.1506    | 0.1837    | C      | -1.3679   | 0.1423    | 0.237     |
| C      | -0.5521   | -0.8974   | -0.2638   | C      | -0.6282   | -0.8749   | -0.2786   |
| C      | -1.1075   | -2.3122   | -0.2484   | C      | -1.1813   | -2.2896   | -0.3425   |
| C      | -0.7628   | 1.5746    | 0.1063    | C      | -0.8416   | 1.5695    | 0.2391    |
| C      | 0.3995    | 1.7498    | -0.8696   | C      | 0.3034    | 1.8044    | -0.744    |
| C      | 1.4319    | 0.6796    | -0.6017   | C      | 1.3471    | 0.7281    | -0.5529   |
| C      | 0.8946    | -0.7454   | -0.8149   | C      | 0.8144    | -0.6872   | -0.8309   |
| C      | 2.6809    | 0.9374    | -0.157    | C      | 2.606     | 0.9717    | -0.1288   |
| C      | 3.732     | -0.1041   | 0.1756    | C      | 3.6792    | -0.074    | 0.1074    |
| C      | 3.3124    | -1.4891   | -0.3659   | C      | 3.2371    | -1.4533   | -0.4368   |
| C      | 1.83      | -1.7716   | -0.1126   | C      | 1.7563    | -1.7395   | -0.1787   |
| C      | 3.9873    | -0.2112   | 1.6788    | C      | 3.9084    | -0.1811   | 1.6134    |
| C      | 3.3327    | 0.4034    | 2.6755    | C      | 5.0567    | -0.0286   | 2.2889    |
| C      | 5.0556    | 0.3071    | -0.4977   | C      | 4.9434    | 0.3574    | -0.6655   |
| C      | -3.7341   | 0.5462    | -0.2368   | C      | -3.8129   | 0.557     | -0.1397   |
| O      | -3.5618   | 0.7568    | -1.428    | O      | -3.6509   | 0.8367    | -1.318    |
| O      | -4.9579   | 0.7577    | 0.2945    | O      | -5.0322   | 0.7356    | 0.4136    |
| C      | -2.8297   | 0.7784    | 2.1041    | C      | -2.8896   | 0.6512    | 2.2037    |
| C      | 0.8832    | -1.0144   | -2.3401   | C      | 0.7983    | -0.8826   | -2.3669   |
| O      | 0.9373    | 3.0618    | -0.7207   | O      | 0.8354    | 3.1103    | -0.535    |
| H      | -3.1237   | -2.1162   | -1.0005   | H      | -2.9753   | -3.4294   | 0.0062    |
| H      | -2.9066   | -3.426    | 0.1535    | H      | -3.2038   | -2.0535   | -1.0659   |
| H      | -4.1434   | -1.5987   | 1.2157    | H      | -4.2069   | -1.6715   | 1.1852    |
| H      | -2.5806   | -1.8087   | 1.9934    | H      | -2.6376   | -1.9242   | 1.9368    |
| H      | -0.8604   | -2.8335   | -1.1788   | H      | -0.9408   | -2.7548   | -1.3038   |
| H      | -0.6269   | -2.8663   | 0.5674    | H      | -0.6936   | -2.8897   | 0.4356    |
| H      | -0.4555   | 1.8991    | 1.1097    | H      | -0.5186   | 1.8333    | 1.2552    |
| H      | -1.5588   | 2.2653    | -0.1984   | H      | -1.6431   | 2.2756    | -0.0107   |
| H      | 0.0356    | 1.6735    | -1.9008   | H      | -0.0774   | 1.7801    | -1.7718   |
| H      | 2.9771    | 1.968     | 0.0339    | H      | 2.8997    | 1.9927    | 0.1128    |
| H      | 3.9131    | -2.2842   | 0.0954    | H      | 3.8414    | -2.2525   | 0.0132    |
| H      | 3.5117    | -1.5561   | -1.4433   | H      | 3.4236    | -1.5169   | -1.5169   |
| H      | 1.6447    | -1.7739   | 0.9703    | H      | 1.5802    | -1.7849   | 0.9043    |
| H      | 1.6127    | -2.7895   | -0.4609   | H      | 1.5338    | -2.7433   | -0.5634   |
| H      | 4.8       | -0.8807   | 1.9629    | H      | 3.0185    | -0.4042   | 2.2039    |
| H      | 3.6159    | 0.2337    | 3.7098    | H      | 5.073     | -0.1284   | 3.3705    |
| H      | 2.5009    | 1.0778    | 2.498     | H      | 5.9996    | 0.1973    | 1.8038    |
| H      | 4.9337    | 0.4207    | -1.5818   | H      | 4.7335    | 0.4733    | -1.7362   |
| H      | 5.4275    | 1.2628    | -0.1075   | H      | 5.3316    | 1.3194    | -0.3092   |
| H      | 5.8385    | -0.443    | -0.3321   | H      | 5.744     | -0.3857   | -0.5703   |



|               |                  |                  |                  |               |                  |                  |                  |
|---------------|------------------|------------------|------------------|---------------|------------------|------------------|------------------|
| H             | -5.4858          | 1.0794           | -0.4664          | H             | -5.5668          | 1.101            | -0.3225          |
| H             | -3.7708          | 0.5486           | 2.6181           | H             | -3.8262          | 0.3894           | 2.7106           |
| H             | -2.0128          | 0.5259           | 2.7901           | H             | -2.0668          | 0.3596           | 2.8668           |
| H             | -2.8171          | 1.8626           | 1.9435           | H             | -2.8796          | 1.743            | 2.1081           |
| H             | 0.0753           | -0.47            | -2.8434          | H             | -0.0136          | -0.3173          | -2.8399          |
| H             | 1.823            | -0.7091          | -2.8151          | H             | 1.7351           | -0.551           | -2.83            |
| H             | 0.7431           | -2.0775          | -2.5651          | H             | 0.662            | -1.9342          | -2.6423          |
| H             | 1.6138           | 3.1534           | -1.4127          | H             | 1.4984           | 3.2444           | -1.2329          |
| <b>Conf 3</b> | <b>X axis(Å)</b> | <b>Y axis(Å)</b> | <b>Z axis(Å)</b> | <b>Conf 4</b> | <b>X axis(Å)</b> | <b>Y axis(Å)</b> | <b>Z axis(Å)</b> |
| C             | -2.6214          | -2.3922          | -0.0694          | C             | -2.6854          | -2.3928          | -0.0528          |
| C             | -3.0636          | -1.4808          | 1.0638           | C             | -3.1457          | -1.4966          | 1.0849           |
| C             | -2.7149          | -0.0022          | 0.7741           | C             | -2.8045          | -0.0129          | 0.8159           |
| C             | -1.2964          | 0.1488           | 0.1854           | C             | -1.3858          | 0.1601           | 0.2319           |
| C             | -0.5547          | -0.8993          | -0.2604          | C             | -0.6319          | -0.8743          | -0.2223          |
| C             | -1.1104          | -2.3139          | -0.2502          | C             | -1.1745          | -2.2951          | -0.224           |
| C             | -0.76            | 1.5694           | 0.1144           | C             | -0.8714          | 1.587            | 0.173            |
| C             | 0.4097           | 1.7509           | -0.8548          | C             | 0.3228           | 1.8014           | -0.7612          |
| C             | 1.4337           | 0.6737           | -0.5926          | C             | 1.3535           | 0.7165           | -0.5417          |
| C             | 0.8944           | -0.7481          | -0.8057          | C             | 0.8104           | -0.7032          | -0.7761          |
| C             | 2.6894           | 0.9302           | -0.168           | C             | 2.6311           | 0.9599           | -0.1756          |
| C             | 3.7423           | -0.1095          | 0.1581           | C             | 3.7009           | -0.0869          | 0.0711           |
| C             | 3.3121           | -1.4984          | -0.3665          | C             | 3.2314           | -1.4842          | -0.3974          |
| C             | 1.8297           | -1.7733          | -0.1019          | C             | 1.7526           | -1.7397          | -0.0992          |
| C             | 4.017            | -0.2073          | 1.6591           | C             | 3.9729           | -0.1306          | 1.5739           |
| C             | 3.3846           | 0.4249           | 2.659            | C             | 5.1358           | 0.0711           | 2.2105           |
| C             | 5.0582           | 0.2928           | -0.5351          | C             | 4.9462           | 0.2955           | -0.7566          |
| C             | -3.7392          | 0.5496           | -0.2394          | C             | -3.8315          | 0.5326           | -0.1981          |
| O             | -3.5348          | 0.8901           | -1.3948          | O             | -3.656           | 0.7551           | -1.3863          |
| O             | -4.9941          | 0.6293           | 0.2544           | O             | -5.0588          | 0.729            | 0.3303           |
| C             | -2.847           | 0.7816           | 2.0963           | C             | -2.9428          | 0.7506           | 2.1499           |
| C             | 0.8852           | -1.0165          | -2.3315          | C             | 0.7864           | -0.9404          | -2.3068          |
| O             | 0.9645           | 3.0549           | -0.6859          | O             | 0.8614           | 3.104            | -0.5323          |
| H             | -2.9108          | -3.4268          | 0.1483           | H             | -2.9638          | -3.4325          | 0.1547           |
| H             | -3.1266          | -2.1126          | -1.0019          | H             | -3.1881          | -2.1126          | -0.9864          |
| H             | -2.5735          | -1.8087          | 1.9909           | H             | -4.2251          | -1.6301          | 1.23             |
| H             | -4.1413          | -1.6081          | 1.2236           | H             | -2.6642          | -1.8321          | 2.0137           |
| H             | -0.8635          | -2.8324          | -1.1822          | H             | -0.9168          | -2.8057          | -1.1575          |
| H             | -0.6306          | -2.8709          | 0.5641           | H             | -0.6935          | -2.8517          | 0.5899           |
| H             | -0.4561          | 1.8882           | 1.1208           | H             | -0.6026          | 1.9055           | 1.1893           |
| H             | -1.5517          | 2.2653           | -0.1888          | H             | -1.6679          | 2.2694           | -0.1487          |
| H             | 0.065            | 1.6838           | -1.8932          | H             | -0.0106          | 1.7818           | -1.8048          |
| H             | 2.9885           | 1.9664           | -0.0104          | H             | 2.9623           | 1.9875           | -0.0339          |
| H             | 3.9124           | -2.2918          | 0.0985           | H             | 3.8346           | -2.2691          | 0.0785           |
| H             | 3.5047           | -1.5771          | -1.4444          | H             | 3.3966           | -1.6023          | -1.4763          |
| H             | 1.6505           | -1.7673          | 0.9819           | H             | 1.5963           | -1.7383          | 0.9878           |
| H             | 1.6067           | -2.7927          | -0.4424          | H             | 1.5129           | -2.7556          | -0.4386          |
| H             | 4.8261           | -0.8834          | 1.9371           | H             | 3.1055           | -0.3518          | 2.1971           |
| H             | 3.6803           | 0.2622           | 3.6907           | H             | 5.1858           | 0.0108           | 3.2939           |
| H             | 2.5608           | 1.1099           | 2.4842           | H             | 6.0597           | 0.2981           | 1.6901           |
| H             | 4.9228           | 0.3984           | -1.6184          | H             | 4.7071           | 0.3613           | -1.8254          |
| H             | 5.4376           | 1.2504           | -0.1571          | H             | 5.3517           | 1.2703           | -0.4591          |
| H             | 5.8411           | -0.4581          | -0.3736          | H             | 5.7436           | -0.4491          | -0.647           |
| H             | -5.5187          | 0.973            | -0.4991          | H             | -5.5875          | 1.0484           | -0.4314          |
| H             | -3.7934          | 0.555            | 2.6019           | H             | -3.8839          | 0.504            | 2.6561           |
| H             | -2.0366          | 0.5309           | 2.7907           | H             | -2.1269          | 0.5007           | 2.8381           |
| H             | -2.8321          | 1.8651           | 1.9318           | H             | -2.9426          | 1.8364           | 2.0006           |
| H             | 0.0771           | -0.4726          | -2.8351          | H             | -0.0242          | -0.3827          | -2.7912          |
| H             | 1.8247           | -0.7094          | -2.8059          | H             | 1.7225           | -0.6268          | -2.7838          |
| H             | 0.747            | -2.0797          | -2.5571          | H             | 0.6425           | -1.9982          | -2.553           |
| H             | 0.2902           | 3.685            | -0.9893          | H             | 1.1235           | 3.1401           | 0.4027           |
| <b>Conf 5</b> | <b>X axis(Å)</b> | <b>Y axis(Å)</b> | <b>Z axis(Å)</b> | <b>Conf 6</b> | <b>X axis(Å)</b> | <b>Y axis(Å)</b> | <b>Z axis(Å)</b> |

|               |                  |                  |                  |               |                  |                  |                  |
|---------------|------------------|------------------|------------------|---------------|------------------|------------------|------------------|
| C             | -2.6114          | -2.3986          | 0.0229           | C             | -2.6915          | -2.3836          | -0.1597          |
| C             | -3.0768          | -1.4438          | 1.1098           | C             | -3.1274          | -1.5431          | 1.0293           |
| C             | -2.7337          | 0.0238           | 0.7651           | C             | -2.7839          | -0.049           | 0.8264           |
| C             | -1.3118          | 0.1657           | 0.1807           | C             | -1.3701          | 0.1405           | 0.2375           |
| C             | -0.5567          | -0.8917          | -0.2146          | C             | -0.629           | -0.8765          | -0.2761          |
| C             | -1.0997          | -2.3105          | -0.1461          | C             | -1.182           | -2.2908          | -0.346           |
| C             | -0.7955          | 1.5879           | 0.0508           | C             | -0.8381          | 1.5643           | 0.2463           |
| C             | 0.413            | 1.7535           | -0.8757          | C             | 0.3147           | 1.8056           | -0.7293          |
| C             | 1.4346           | 0.6764           | -0.5874          | C             | 1.3501           | 0.7231           | -0.543           |
| C             | 0.8879           | -0.7499          | -0.7695          | C             | 0.8166           | -0.6894          | -0.8214          |
| C             | 2.7034           | 0.9297           | -0.1978          | C             | 2.6143           | 0.9671           | -0.1369          |
| C             | 3.7552           | -0.1132          | 0.1293           | C             | 3.6886           | -0.0762          | 0.0951           |
| C             | 3.306            | -1.5106          | -0.3513          | C             | 3.2392           | -1.4597          | -0.4339          |
| C             | 1.8267           | -1.7653          | -0.0558          | C             | 1.7582           | -1.7405          | -0.1671          |
| C             | 4.0621           | -0.1749          | 1.6256           | C             | 3.9328           | -0.1748          | 1.5999           |
| C             | 3.4378           | 0.4605           | 2.6287           | C             | 5.0882           | -0.0206          | 2.2628           |
| C             | 5.0589           | 0.262            | -0.6022          | C             | 4.9455           | 0.3478           | -0.6934          |
| C             | -3.7549          | 0.5156           | -0.2816          | C             | -3.8169          | 0.5602           | -0.1445          |
| O             | -3.5726          | 0.678            | -1.4785          | O             | -3.6218          | 0.9688           | -1.2793          |
| O             | -4.9858          | 0.7371           | 0.2288           | O             | -5.068           | 0.6079           | 0.3629           |
| C             | -2.8793          | 0.8562           | 2.0564           | C             | -2.9073          | 0.6537           | 2.1943           |
| C             | 0.8638           | -1.0464          | -2.2903          | C             | 0.8042           | -0.884           | -2.3579          |
| O             | 0.9544           | 3.0636           | -0.7022          | O             | 0.864            | 3.1026           | -0.5013          |
| H             | -3.1095          | -2.1675          | -0.9265          | H             | -2.9772          | -3.4301          | -0.0026          |
| H             | -2.8913          | -3.4259          | 0.2831           | H             | -3.2039          | -2.0497          | -1.0702          |
| H             | -4.1569          | -1.5694          | 1.2565           | H             | -4.2038          | -1.6824          | 1.1888           |
| H             | -2.5999          | -1.7302          | 2.0572           | H             | -2.63            | -1.9249          | 1.9316           |
| H             | -0.8378          | -2.8677          | -1.0514          | H             | -0.9408          | -2.7528          | -1.3087          |
| H             | -0.6225          | -2.8249          | 0.6972           | H             | -0.6955          | -2.8938          | 0.4306           |
| H             | -0.541           | 1.9609           | 1.0521           | H             | -0.5192          | 1.8221           | 1.2653           |
| H             | -1.5874          | 2.2513           | -0.3185          | H             | -1.6356          | 2.2753           | -0.0019          |
| H             | 0.0949           | 1.6856           | -1.9219          | H             | -0.0465          | 1.7907           | -1.7643          |
| H             | 3.0373           | 1.9607           | -0.0943          | H             | 2.9092           | 1.9957           | 0.072            |
| H             | 3.9072           | -2.2967          | 0.1249           | H             | 3.8433           | -2.2566          | 0.0204           |
| H             | 3.4806           | -1.6198          | -1.4295          | H             | 3.4208           | -1.5341          | -1.5141          |
| H             | 1.665            | -1.7312          | 1.0302           | H             | 1.5865           | -1.7786          | 0.917            |
| H             | 1.5915           | -2.791           | -0.3678          | H             | 1.5317           | -2.7459          | -0.5451          |
| H             | 4.8899           | -0.8306          | 1.8988           | H             | 3.048            | -0.3919          | 2.1997           |
| H             | 3.7607           | 0.319            | 3.6558           | H             | 5.1156           | -0.113           | 3.3446           |
| H             | 2.5934           | 1.1209           | 2.4647           | H             | 6.0258           | 0.2015           | 1.7657           |
| H             | 4.8998           | 0.3449           | -1.6843          | H             | 4.725            | 0.4568           | -1.7627          |
| H             | 5.4552           | 1.2241           | -0.2542          | H             | 5.3388           | 1.3115           | -0.3475          |
| H             | 5.8388           | -0.4923          | -0.4418          | H             | 5.7458           | -0.396           | -0.6012          |
| H             | -5.5101          | 1.0162           | -0.5515          | H             | -5.5991          | 0.9951           | -0.3646          |
| H             | -3.8231          | 0.6361           | 2.5698           | H             | -3.8495          | 0.3952           | 2.6924           |
| H             | -2.0671          | 0.6431           | 2.7612           | H             | -2.0913          | 0.3635           | 2.8663           |
| H             | -2.8785          | 1.9327           | 1.8502           | H             | -2.8954          | 1.7452           | 2.0952           |
| H             | 0.0541           | -0.5073          | -2.7968          | H             | -0.0075          | -0.3193          | -2.8321          |
| H             | 1.8003           | -0.753           | -2.7789          | H             | 1.7413           | -0.5505          | -2.8193          |
| H             | 0.7176           | -2.1127          | -2.495           | H             | 0.6703           | -1.9356          | -2.6342          |
| H             | 1.198            | 3.1461           | 0.2347           | H             | 0.1787           | 3.7433           | -0.7533          |
| <b>Conf 7</b> | <b>X axis(Å)</b> | <b>Y axis(Å)</b> | <b>Z axis(Å)</b> | <b>Conf 8</b> | <b>X axis(Å)</b> | <b>Y axis(Å)</b> | <b>Z axis(Å)</b> |
| C             | -2.5729          | -2.3537          | -0.556           | C             | -2.6285          | -2.3961          | -0.0367          |
| C             | -3.038           | -1.7177          | 0.744            | C             | -3.0777          | -1.4766          | 1.0871           |
| C             | -2.7321          | -0.2025          | 0.7805           | C             | -2.7107          | -0.0007          | 0.806            |
| C             | -1.3266          | 0.1176           | 0.2321           | C             | -1.3021          | 0.1478           | 0.1975           |
| C             | -0.5563          | -0.7859          | -0.4299          | C             | -0.5625          | -0.9032          | -0.2454          |
| C             | -1.0666          | -2.1884          | -0.7174          | C             | -1.1169          | -2.3181          | -0.2137          |
| C             | -0.8416          | 1.5417           | 0.461            | C             | -0.7754          | 1.5715           | 0.1039           |
| C             | 0.3062           | 1.9579           | -0.4573          | C             | 0.3793           | 1.7379           | -0.8828          |
| C             | 1.3748           | 0.8898           | -0.4237          | C             | 1.4163           | 0.6739           | -0.6089          |

|   |         |         |         |   |         |         |         |
|---|---------|---------|---------|---|---------|---------|---------|
| C | 0.8808  | -0.4724 | -0.9365 | C | 0.8813  | -0.7547 | -0.8041 |
| C | 2.6195  | 1.0895  | 0.0614  | C | 2.6664  | 0.9394  | -0.1719 |
| C | 3.7145  | 0.0415  | 0.1616  | C | 3.721   | -0.0964 | 0.1681  |
| C | 3.3248  | -1.2122 | -0.658  | C | 3.3022  | -1.4883 | -0.3564 |
| C | 1.8541  | -1.5917 | -0.4686 | C | 1.8214  | -1.7711 | -0.094  |
| C | 3.9879  | -0.2164 | 1.6426  | C | 3.9823  | -0.1864 | 1.6713  |
| C | 3.9821  | -1.3796 | 2.3094  | C | 3.3294  | 0.4367  | 2.6639  |
| C | 5.0092  | 0.6202  | -0.4456 | C | 5.0411  | 0.3102  | -0.5149 |
| C | -3.7817 | 0.5149  | -0.0932 | C | -3.7965 | 0.5694  | -0.1292 |
| O | -3.6246 | 0.9812  | -1.2116 | O | -4.9012 | 0.9678  | 0.2119  |
| O | -5.0079 | 0.5676  | 0.4712  | O | -3.4778 | 0.5676  | -1.4399 |
| C | -2.8682 | 0.2706  | 2.2429  | C | -2.8036 | 0.761   | 2.1461  |
| C | 0.8659  | -0.4104 | -2.4841 | C | 0.8645  | -1.0406 | -2.3263 |
| O | 0.8034  | 3.2265  | -0.0374 | O | 0.9125  | 3.0538  | -0.7578 |
| H | -2.8266 | -3.4201 | -0.5618 | H | -2.9173 | -3.4291 | 0.189   |
| H | -3.0936 | -1.9016 | -1.4089 | H | -3.1311 | -2.1276 | -0.9735 |
| H | -4.1124 | -1.9032 | 0.8674  | H | -4.1604 | -1.5876 | 1.2291  |
| H | -2.538  | -2.2237 | 1.5812  | H | -2.6064 | -1.812  | 2.0212  |
| H | -0.8102 | -2.4901 | -1.7381 | H | -0.8669 | -2.8506 | -1.137  |
| H | -0.5625 | -2.8883 | -0.0395 | H | -0.6378 | -2.8617 | 0.61    |
| H | -0.536  | 1.654   | 1.51    | H | -0.4606 | 1.9062  | 1.1016  |
| H | -1.6611 | 2.2556  | 0.3122  | H | -1.5756 | 2.2571  | -0.2015 |
| H | -0.0645 | 2.0885  | -1.4807 | H | 0.008   | 1.6463  | -1.9101 |
| H | 2.8787  | 2.0687  | 0.4621  | H | 2.9609  | 1.9724  | 0.0085  |
| H | 3.9639  | -2.0659 | -0.4014 | H | 3.9065  | -2.2769 | 0.1114  |
| H | 3.5052  | -1.0359 | -1.7268 | H | 3.4975  | -1.5668 | -1.4337 |
| H | 1.6714  | -1.8295 | 0.5874  | H | 1.6403  | -1.7617 | 0.9895  |
| H | 1.6678  | -2.5189 | -1.0257 | H | 1.6048  | -2.7933 | -0.4301 |
| H | 4.224   | 0.6749  | 2.2268  | H | 4.7982  | -0.85   | 1.9596  |
| H | 4.1981  | -1.4005 | 3.3738  | H | 3.617   | 0.2789  | 3.6989  |
| H | 3.7632  | -2.3306 | 1.8384  | H | 2.4944  | 1.1062  | 2.4827  |
| H | 4.8661  | 0.9058  | -1.4949 | H | 4.9147  | 0.4115  | -1.5997 |
| H | 5.3477  | 1.5161  | 0.09    | H | 5.4124  | 1.2708  | -0.1368 |
| H | 5.8244  | -0.1126 | -0.4096 | H | 5.8262  | -0.4364 | -0.3441 |
| H | -5.5509 | 1.0275  | -0.2031 | H | -4.2748 | 0.9361  | -1.874  |
| H | -3.7979 | -0.094  | 2.696   | H | -3.7527 | 0.5529  | 2.655   |
| H | -2.0389 | -0.0963 | 2.8588  | H | -1.9936 | 0.4728  | 2.8262  |
| H | -2.8907 | 1.3638  | 2.3179  | H | -2.7582 | 1.8469  | 2.0037  |
| H | 0.0347  | 0.1987  | -2.859  | H | 0.053   | -0.5041 | -2.8322 |
| H | 1.7897  | 0.0237  | -2.8842 | H | 1.8014  | -0.7378 | -2.8085 |
| H | 0.7618  | -1.4056 | -2.9304 | H | 0.7266  | -2.1065 | -2.5389 |
| H | 1.4604  | 3.4894  | -0.7036 | H | 1.6023  | 3.1303  | -1.4383 |

**Table S8.** The Cartesian coordinates of the lowest energy conformers for (9*R*,10*S*,13*S*)-5

| Conf 1 | X axis(Å) | Y axis(Å) | Z axis(Å) | Conf 2 | X axis(Å) | Y axis(Å) | Z axis(Å) |
|--------|-----------|-----------|-----------|--------|-----------|-----------|-----------|
| C      | 0.018     | 1.9296    | 0.0365    | C      | -0.0556   | 1.8815    | 0.0448    |
| C      | -0.7983   | 0.8865    | -0.19     | C      | -0.815    | 0.8095    | -0.2376   |
| C      | -2.2478   | 1.1236    | -0.5631   | C      | -2.2593   | 0.992     | -0.659    |
| C      | -3.2571   | 0.1979    | 0.1577    | C      | -3.2472   | 6.00E-04  | 0.0016    |
| C      | -0.3116   | -0.5515   | -0.1906   | C      | -0.2648   | -0.6058   | -0.2569   |
| C      | -4.6461   | 0.4677    | -0.4224   | C      | -4.5854   | 0.0974    | -0.7327   |
| C      | -3.3289   | 0.5551    | 1.6586    | C      | -3.3748   | 0.3253    | 1.5074    |
| C      | 1.4802    | 1.7837    | 0.2134    | C      | 1.4047    | 1.7957    | 0.2698    |
| C      | 1.1244    | -0.729    | 0.4734    | C      | 1.1557    | -0.737    | 0.4502    |
| C      | 2.0455    | 0.4082    | 0.0191    | C      | 2.0381    | 0.4527    | 0.0576    |
| C      | 3.2991    | 0.23      | -0.4589   | C      | 3.3133    | 0.3444    | -0.3827   |
| O      | -0.2528   | -0.9111   | -1.5812   | O      | -0.1462   | -0.9244   | -1.654    |
| O      | 2.1555    | 2.7583    | 0.5197    | O      | 2.0247    | 2.7897    | 0.6264    |
| C      | 3.943     | -1.1374   | -0.5138   | C      | 4.0205    | -0.9907   | -0.4524   |

|               |                  |                  |                  |               |                  |                  |                  |
|---------------|------------------|------------------|------------------|---------------|------------------|------------------|------------------|
| C             | 1.7204           | -2.118           | 0.0888           | C             | 1.8268           | -2.0866          | 0.0493           |
| C             | 3.2242           | -2.1921          | 0.3202           | C             | 3.3241           | -2.0994          | 0.329            |
| C             | 1.0632           | -0.644           | 2.0255           | C             | 1.0402           | -0.6981          | 2.001            |
| C             | -1.3523          | -1.5016          | 0.4527           | C             | -1.2814          | -1.6195          | 0.3271           |
| C             | -2.7883          | -1.2651          | -0.031           | C             | -2.7095          | -1.4361          | -0.1992          |
| C             | 4.1886           | 1.3287           | -0.9859          | C             | 4.1683           | 1.4964           | -0.8497          |
| C             | -5.4855          | -0.4077          | -0.9927          | C             | -5.7896          | 0.3941           | -0.2245          |
| H             | -0.3355          | 2.9557           | 0.0331           | H             | -0.4554          | 2.8904           | 0.0545           |
| H             | -2.5192          | 2.1736           | -0.3849          | H             | -2.5912          | 2.0215           | -0.4652          |
| H             | -2.3333          | 0.9742           | -1.6493          | H             | -2.2911          | 0.8706           | -1.7516          |
| H             | -4.9864          | 1.5024           | -0.3551          | H             | -4.5425          | -0.108           | -1.8041          |
| H             | -3.6947          | 1.5786           | 1.8075           | H             | -3.7918          | 1.3274           | 1.6635           |
| H             | -4.0111          | -0.1187          | 2.1906           | H             | -4.026           | -0.3952          | 2.0157           |
| H             | -2.3544          | 0.4947           | 2.1527           | H             | -2.4095          | 0.3074           | 2.023            |
| H             | 0.377            | -0.3095          | -2.0154          | H             | 0.4828           | -0.2944          | -2.0473          |
| H             | 3.978            | -1.4621          | -1.5615          | H             | 4.104            | -1.284           | -1.5065          |
| H             | 4.9803           | -1.0731          | -0.1629          | H             | 5.042            | -0.8897          | -0.0654          |
| H             | 1.2299           | -2.9163          | 0.6588           | H             | 1.3553           | -2.9217          | 0.5813           |
| H             | 1.5395           | -2.3452          | -0.9688          | H             | 1.6907           | -2.2921          | -1.0194          |
| H             | 3.5946           | -3.1874          | 0.0484           | H             | 3.7484           | -3.0691          | 0.0435           |
| H             | 3.455            | -2.0535          | 1.3828           | H             | 3.514            | -1.9803          | 1.402            |
| H             | 0.6382           | -1.5534          | 2.4641           | H             | 0.6431           | -1.6375          | 2.4009           |
| H             | 2.0605           | -0.5221          | 2.4651           | H             | 2.0161           | -0.5441          | 2.4771           |
| H             | 0.4567           | 0.2004           | 2.3708           | H             | 0.385            | 0.1084           | 2.3477           |
| H             | -1.0972          | -2.5423          | 0.2162           | H             | -0.9705          | -2.6409          | 0.0744           |
| H             | -1.3496          | -1.4186          | 1.5432           | H             | -1.3187          | -1.5644          | 1.4188           |
| H             | -2.8452          | -1.5451          | -1.0915          | H             | -2.7244          | -1.7008          | -1.2657          |
| H             | -3.4536          | -1.9513          | 0.5091           | H             | -3.3671          | -2.159           | 0.3018           |
| H             | 4.752            | 0.9733           | -1.8562          | H             | 4.7746           | 1.1915           | -1.7103          |
| H             | 3.632            | 2.2045           | -1.3292          | H             | 3.5836           | 2.356            | -1.1872          |
| H             | 4.9052           | 1.6371           | -0.2184          | H             | 4.8452           | 1.8141           | -0.0508          |
| H             | -6.452           | -0.0797          | -1.365           | H             | -6.6641          | 0.4243           | -0.8685          |
| H             | -5.2506          | -1.4601          | -1.1083          | H             | -5.9509          | 0.61             | 0.8258           |
| <b>Conf 3</b> | <b>X axis(Å)</b> | <b>Y axis(Å)</b> | <b>Z axis(Å)</b> | <b>Conf 4</b> | <b>X axis(Å)</b> | <b>Y axis(Å)</b> | <b>Z axis(Å)</b> |
| C             | -0.113           | 1.8477           | 0.2069           | C             | 0.0214           | 1.9327           | 0.0357           |
| C             | -0.8636          | 0.7777           | -0.1046          | C             | -0.8043          | 0.8966           | -0.1913          |
| C             | -2.3283          | 0.9517           | -0.4552          | C             | -2.2643          | 1.1569           | -0.5011          |
| C             | -3.2706          | -0.09            | 0.1956           | C             | -3.2556          | 0.1852           | 0.1828           |
| C             | -0.2885          | -0.6217          | -0.2279          | C             | -0.3086          | -0.5396          | -0.2371          |
| C             | -4.7066          | -0.033           | -0.325           | C             | -4.6543          | 0.483            | -0.3576          |
| C             | -3.3438          | 0.1524           | 1.7189           | C             | -3.2998          | 0.4526           | 1.7028           |
| C             | 1.3569           | 1.7799           | 0.3667           | C             | 1.4869           | 1.7856           | 0.189            |
| C             | 1.1615           | -0.7635          | 0.4138           | C             | 1.1153           | -0.7241          | 0.4546           |
| C             | 2.0055           | 0.464            | 0.0544           | C             | 2.0522           | 0.4082           | 0.0185           |
| C             | 3.2636           | 0.4064           | -0.4413          | C             | 3.3185           | 0.2236           | -0.4238          |
| O             | -0.2201          | -0.8598          | -1.6439          | O             | -0.1737          | -0.8546          | -1.6341          |
| O             | 1.9726           | 2.7657           | 0.7524           | O             | 2.1608           | 2.7663           | 0.483            |
| C             | 3.9914           | -0.9082          | -0.6142          | C             | 3.9563           | -1.1467          | -0.4616          |
| C             | 1.84             | -2.0747          | -0.0892          | C             | 1.7136           | -2.1158          | 0.0811           |
| C             | 3.3474           | -2.0727          | 0.13             | C             | 3.2103           | -2.1991          | 0.3507           |
| C             | 1.1089           | -0.8136          | 1.9677           | C             | 1.0247           | -0.6415          | 2.0061           |
| C             | -1.2628          | -1.6851          | 0.3373           | C             | -1.3484          | -1.5291          | 0.3474           |
| C             | -2.7158          | -1.5             | -0.1154          | C             | -2.7891          | -1.2626          | -0.1026          |
| C             | 4.0778           | 1.5996           | -0.8763          | C             | 4.2233           | 1.3158           | -0.937           |
| C             | -5.2364          | 0.8407           | -1.1922          | C             | -5.5032          | -0.36            | -0.9618          |
| H             | -0.5306          | 2.8459           | 0.2909           | H             | -0.3283          | 2.9597           | 0.0609           |
| H             | -2.6638          | 1.9648           | -0.1945          | H             | -2.3852          | 1.0866           | -1.5917          |
| H             | -2.4012          | 0.8775           | -1.5495          | H             | -2.5286          | 2.1917           | -0.241           |
| H             | -5.3739          | -0.8016          | 0.0691           | H             | -4.9961          | 1.5114           | -0.2242          |
| H             | -3.8087          | 1.121            | 1.9403           | H             | -3.6693          | 1.4625           | 1.9193           |
| H             | -3.9407          | -0.6211          | 2.217            | H             | -3.9666          | -0.2566          | 2.2075           |

|   |         |         |         |   |         |         |         |
|---|---------|---------|---------|---|---------|---------|---------|
| H | -2.3568 | 0.1568  | 2.1919  | H | -2.3148 | 0.371   | 2.1725  |
| H | 0.3692  | -0.1873 | -2.0281 | H | -0.9731 | -0.5671 | -2.1034 |
| H | 4.0374  | -1.1405 | -1.6857 | H | 4.0188  | -1.4711 | -1.5081 |
| H | 5.0257  | -0.8082 | -0.2627 | H | 4.9839  | -1.0875 | -0.0823 |
| H | 1.4055  | -2.9476 | 0.4129  | H | 1.2049  | -2.9128 | 0.637   |
| H | 1.6645  | -2.2229 | -1.1616 | H | 1.5574  | -2.3396 | -0.9813 |
| H | 3.7771  | -3.0162 | -0.2265 | H | 3.5819  | -3.1959 | 0.0859  |
| H | 3.5785  | -2.01   | 1.1997  | H | 3.4148  | -2.0648 | 1.4193  |
| H | 0.7454  | -1.7817 | 2.3292  | H | 0.5952  | -1.5525 | 2.4364  |
| H | 2.1005  | -0.6667 | 2.4125  | H | 2.0134  | -0.5169 | 2.464   |
| H | 0.454   | -0.0412 | 2.3854  | H | 0.4098  | 0.2002  | 2.3424  |
| H | -0.9461 | -2.6847 | 0.0142  | H | -1.0961 | -2.552  | 0.0408  |
| H | -1.2552 | -1.6912 | 1.4311  | H | -1.3375 | -1.5197 | 1.4407  |
| H | -2.7796 | -1.6959 | -1.1947 | H | -2.8625 | -1.4785 | -1.1768 |
| H | -3.3317 | -2.2689 | 0.3702  | H | -3.4472 | -1.9808 | 0.4039  |
| H | 4.6547  | 1.3552  | -1.7756 | H | 4.8189  | 0.9482  | -1.7805 |
| H | 3.4645  | 2.4643  | -1.1421 | H | 3.6767  | 2.1832  | -1.3157 |
| H | 4.7804  | 1.8867  | -0.0878 | H | 4.9111  | 1.6393  | -0.1498 |
| H | -6.2824 | 0.7642  | -1.4766 | H | -6.4773 | -0.012  | -1.2953 |
| H | -4.6677 | 1.6467  | -1.6421 | H | -5.2742 | -1.4049 | -1.1391 |

**Table S9.** The Cartesian coordinates of the lowest energy conformers for (4*R*,5*S*,10*S*)-**6**

| Conf 1 | X axis(Å) | Y axis(Å) | Z axis(Å) | Conf 2 | X axis(Å) | Y axis(Å) | Z axis(Å) |
|--------|-----------|-----------|-----------|--------|-----------|-----------|-----------|
| C      | -2.36     | -1.9428   | -1.7634   | C      | -2.2823   | -1.4257   | -2.2228   |
| C      | -2.9967   | -1.7008   | -0.4044   | C      | -2.9836   | -1.5421   | -0.8791   |
| C      | -2.2967   | -0.5825   | 0.4106    | C      | -2.342    | -0.6632   | 0.2259    |
| C      | -0.7391   | -0.8314   | 0.4726    | C      | -0.7843   | -0.9088   | 0.2973    |
| C      | -0.055    | -1.2022   | -0.8878   | C      | -0.0332   | -0.9164   | -1.0782   |
| C      | -0.8887   | -2.2967   | -1.6006   | C      | -0.8133   | -1.7992   | -2.0847   |
| C      | 0.0033    | 0.2946    | 1.2339    | C      | -0.098    | -0.0086   | 1.3543    |
| C      | 1.39      | -0.1147   | 1.729     | C      | 1.2728    | -0.5209   | 1.7952    |
| C      | 2.4306    | -0.2185   | 0.651     | C      | 2.3624    | -0.3397   | 0.7775    |
| C      | 2.2993    | -1.1017   | -0.4198   | C      | 2.2955    | -0.9219   | -0.4875   |
| C      | 3.6125    | 0.5377    | 0.7536    | C      | 3.5242    | 0.3734    | 1.1253    |
| C      | 4.6534    | 0.4101    | -0.1821   | C      | 4.6079    | 0.4954    | 0.2391    |
| C      | 4.5041    | -0.5115   | -1.2249   | C      | 4.5225    | -0.1311   | -1.0098   |
| C      | 3.3389    | -1.2693   | -1.3353   | C      | 3.3779    | -0.8436   | -1.3647   |
| C      | -2.8495   | -0.6531   | 1.8432    | C      | -2.9567   | -1.1      | 1.5653    |
| O      | -3.3312   | 0.2605    | 2.4936    | O      | -3.484    | -0.3853   | 2.4026    |
| O      | -2.726    | -1.8677   | 2.4158    | O      | -2.8361   | -2.4195   | 1.8159    |
| C      | 0.1582    | -0.0484   | -1.8969   | C      | 0.203     | 0.4577    | -1.7498   |
| C      | -2.6595   | 0.8236    | -0.1302   | C      | -2.7068   | 0.8317    | 0.043     |
| O      | -4.0808   | 0.9427    | -0.3261   | O      | -4.1199   | 0.9869    | -0.1841   |
| C      | -4.4884   | 2.1663    | -0.7617   | C      | -4.5308   | 2.2782    | -0.3137   |
| O      | -3.7515   | 3.1033    | -1.0333   | O      | -3.8003   | 3.2585    | -0.3027   |
| C      | -5.9813   | 2.1982    | -0.8761   | C      | -6.0174   | 2.3278    | -0.4877   |
| C      | 5.9288    | 1.2272    | -0.074    | C      | 5.8408    | 1.2774    | 0.6571    |
| C      | 5.6463    | 2.729     | -0.1639   | C      | 7.075     | 0.376     | 0.7413    |
| C      | 6.7028    | 0.8928    | 1.2035    | C      | 6.096     | 2.4666    | -0.2725   |
| O      | 1.199     | -1.887    | -0.6059   | O      | 1.2197    | -1.6417   | -0.9195   |
| H      | -0.4526   | -2.5189   | -2.5836   | H      | -0.3297   | -1.7608   | -3.0698   |
| H      | -0.8083   | -3.2381   | -1.0384   | H      | -0.7403   | -2.8521   | -1.7769   |
| H      | -0.6083   | -1.727    | 1.1011    | H      | -0.6648   | -1.934    | 0.6833    |
| H      | -2.4917   | -1.0711   | -2.4118   | H      | -2.4014   | -0.4187   | -2.6341   |
| H      | -2.8752   | -2.7749   | -2.258    | H      | -2.7591   | -2.1081   | -2.9366   |
| H      | -2.9612   | -2.6508   | 0.1455    | H      | -2.9546   | -2.6004   | -0.5873   |
| H      | -4.0652   | -1.4898   | -0.5317   | H      | -4.0491   | -1.313    | -0.9997   |
| H      | 0.0676    | 1.2063    | 0.6302    | H      | -0.0241   | 1.0272    | 1.0057    |
| H      | -0.5733   | 0.5645    | 2.1266    | H      | -0.7188   | 0.0212    | 2.2575    |

|               |                  |                  |                  |               |                  |                  |                  |
|---------------|------------------|------------------|------------------|---------------|------------------|------------------|------------------|
| H             | 1.3417           | -1.0681          | 2.2701           | H             | 1.2184           | -1.5809          | 2.0736           |
| H             | 1.7088           | 0.63             | 2.4699           | H             | 1.544            | 0.013            | 2.7153           |
| H             | 3.7291           | 1.229            | 1.5865           | H             | 3.5916           | 0.8314           | 2.1111           |
| H             | 5.2942           | -0.6509          | -1.9589          | H             | 5.3462           | -0.0747          | -1.717           |
| H             | 3.2339           | -1.9855          | -2.1456          | H             | 3.3225           | -1.3306          | -2.3345          |
| H             | -3.1023          | -1.7484          | 3.3135           | H             | -3.2543          | -2.5352          | 2.6954           |
| H             | -0.7678          | 0.3115           | -2.3448          | H             | -0.7088          | 0.9133           | -2.1356          |
| H             | 0.665            | 0.813            | -1.4535          | H             | 0.6731           | 1.1814           | -1.0784          |
| H             | 0.7922           | -0.3817          | -2.7282          | H             | 0.8796           | 0.3514           | -2.6071          |
| H             | -2.3362          | 1.6079           | 0.5655           | H             | -2.4297          | 1.4153           | 0.9297           |
| H             | -2.1846          | 1.0099           | -1.0922          | H             | -2.1931          | 1.26             | -0.8162          |
| H             | -6.4322          | 1.99             | 0.0975           | H             | -6.5073          | 1.8754           | 0.3782           |
| H             | -6.2988          | 3.1936           | -1.1998          | H             | -6.3389          | 3.3705           | -0.5628          |
| H             | -6.3115          | 1.467            | -1.6179          | H             | -6.3003          | 1.8073           | -1.406           |
| H             | 6.579            | 0.9725           | -0.9215          | H             | 5.6711           | 1.6869           | 1.6617           |
| H             | 6.5832           | 3.2966           | -0.1723          | H             | 7.9356           | 0.9365           | 1.1223           |
| H             | 5.1              | 2.9702           | -1.0826          | H             | 6.8982           | -0.4676          | 1.4179           |
| H             | 5.0498           | 3.086            | 0.6826           | H             | 7.3513           | -0.0329          | -0.2367          |
| H             | 7.6583           | 1.428            | 1.2257           | H             | 6.9357           | 3.0674           | 0.0934           |
| H             | 6.9181           | -0.18            | 1.2612           | H             | 5.2162           | 3.1175           | -0.3258          |
| H             | 6.1455           | 1.1701           | 2.1049           | H             | 6.3366           | 2.1463           | -1.292           |
| <b>Conf 3</b> | <b>X axis(Å)</b> | <b>Y axis(Å)</b> | <b>Z axis(Å)</b> | <b>Conf 4</b> | <b>X axis(Å)</b> | <b>Y axis(Å)</b> | <b>Z axis(Å)</b> |
| C             | -2.718           | -2.3245          | -1.6191          | C             | -2.5967          | -2.221           | -1.8621          |
| C             | -3.3859          | -1.8124          | -0.3501          | C             | -3.3441          | -1.8332          | -0.5934          |
| C             | -2.674           | -0.5803          | 0.2699           | C             | -2.7059          | -0.635           | 0.1591           |
| C             | -1.1346          | -0.8904          | 0.454            | C             | -1.1681          | -0.9139          | 0.3989           |
| C             | -0.4156          | -1.4758          | -0.8069          | C             | -0.3676          | -1.374           | -0.8648          |
| C             | -1.2548          | -2.6531          | -1.3689          | C             | -1.1378          | -2.5258          | -1.5619          |
| C             | -0.3499          | 0.26             | 1.1309           | C             | -0.4572          | 0.2005           | 1.2053           |
| C             | 0.9733           | -0.1851          | 1.753            | C             | 0.8472           | -0.2546          | 1.8592           |
| C             | 2.0562           | -0.4138          | 0.7378           | C             | 1.987            | -0.369           | 0.8878           |
| C             | 1.9269           | -1.3759          | -0.2617          | C             | 1.9399           | -1.2502          | -0.1905          |
| C             | 3.2567           | 0.3138           | 0.8186           | C             | 3.1574           | 0.3838           | 1.0894           |
| C             | 4.3193           | 0.08             | -0.0709          | C             | 4.2706           | 0.2536           | 0.2419           |
| C             | 4.1702           | -0.9174          | -1.0421          | C             | 4.2034           | -0.6655          | -0.8125          |
| C             | 2.9854           | -1.6476          | -1.1283          | C             | 3.049            | -1.42            | -1.0189          |
| C             | -3.3395          | -0.3765          | 1.6392           | C             | -3.4456          | -0.5624          | 1.5033           |
| O             | -4.1441          | 0.4885           | 1.9459           | O             | -4.293           | 0.2509           | 1.8349           |
| O             | -3.0021          | -1.3074          | 2.5544           | O             | -3.1236          | -1.5541          | 2.3582           |
| C             | -0.1479          | -0.478           | -1.9546          | C             | -0.0759          | -0.2791          | -1.914           |
| C             | -3.0328          | 0.6653           | -0.583           | C             | -3.0628          | 0.6645           | -0.6099          |
| O             | -2.3473          | 1.8407           | -0.1383          | O             | -2.4405          | 1.8196           | -0.0375          |
| C             | -2.5855          | 2.9532           | -0.8858          | C             | -2.6789          | 2.9817           | -0.7053          |
| O             | -3.2878          | 2.999            | -1.8853          | O             | -3.3318          | 3.0877           | -1.7334          |
| C             | -1.8451          | 4.1217           | -0.3121          | C             | -2.0084          | 4.1213           | -0.0021          |
| C             | 5.6169           | 0.8645           | 0.0118           | C             | 5.5141           | 1.0876           | 0.4952           |
| C             | 5.386            | 2.3616           | -0.2088          | C             | 6.7172           | 0.209            | 0.8466           |
| C             | 6.3412           | 0.6133           | 1.3366           | C             | 5.8326           | 1.9994           | -0.6924          |
| O             | 0.8112           | -2.1473          | -0.3995          | O             | 0.8588           | -2.0401          | -0.4478          |
| H             | -0.799           | -3.0281          | -2.2949          | H             | -0.6238          | -2.8111          | -2.4895          |
| H             | -1.2016          | -3.4991          | -0.6684          | H             | -1.0915          | -3.424           | -0.929           |
| H             | -1.0888          | -1.7124          | 1.1862           | H             | -1.1316          | -1.7907          | 1.065            |
| H             | -2.8196          | -1.6003          | -2.4331          | H             | -3.0669          | -3.1123          | -2.2949          |
| H             | -3.2362          | -3.2311          | -1.9542          | H             | -2.6814          | -1.4365          | -2.6201          |
| H             | -3.4111          | -2.6363          | 0.3763           | H             | -3.3782          | -2.7136          | 0.063            |
| H             | -4.4374          | -1.5786          | -0.5632          | H             | -4.3908          | -1.6139          | -0.8423          |
| H             | -0.1588          | 1.0797           | 0.4319           | H             | -0.2587          | 1.0792           | 0.5845           |
| H             | -0.9554          | 0.6764           | 1.9447           | H             | -1.1163          | 0.5318           | 2.0164           |
| H             | 0.8414           | -1.0924          | 2.3553           | H             | 0.7154           | -1.211           | 2.38             |
| H             | 1.2928           | 0.5958           | 2.4551           | H             | 1.1048           | 0.4761           | 2.6367           |
| H             | 3.3689           | 1.0672           | 1.5961           | H             | 3.2065           | 1.0754           | 1.929            |

|               |                  |                  |                  |               |                  |                  |                  |
|---------------|------------------|------------------|------------------|---------------|------------------|------------------|------------------|
| H             | 4.9766           | -1.1391          | -1.7371          | H             | 5.0497           | -0.808           | -1.4797          |
| H             | 2.8818           | -2.4256          | -1.8796          | H             | 3.0091           | -2.1372          | -1.834           |
| H             | -3.518           | -1.0578          | 3.3502           | H             | -3.6869          | -1.3851          | 3.1431           |
| H             | -1.0551          | -0.1432          | -2.4554          | H             | -0.9676          | 0.0686           | -2.4337          |
| H             | 0.3879           | 0.414            | -1.6175          | H             | 0.4122           | 0.5979           | -1.4794          |
| H             | 0.4814           | -0.9412          | -2.7246          | H             | 0.6063           | -0.6599          | -2.684           |
| H             | -2.8007          | 0.5008           | -1.6365          | H             | -2.7725          | 0.5928           | -1.6594          |
| H             | -4.1131          | 0.8596           | -0.5315          | H             | -4.1503          | 0.822            | -0.6004          |
| H             | -2.062           | 5.0148           | -0.905           | H             | -0.9266          | 3.9665           | 0.0048           |
| H             | -2.172           | 4.2994           | 0.7156           | H             | -2.2258          | 5.0528           | -0.5324          |
| H             | -0.7695          | 3.9312           | -0.3465          | H             | -2.392           | 4.2047           | 1.0179           |
| H             | 6.2836           | 0.5216           | -0.7907          | H             | 5.3276           | 1.7398           | 1.3588           |
| H             | 6.3405           | 2.8985           | -0.2327          | H             | 7.5829           | 0.8279           | 1.1063           |
| H             | 4.8756           | 2.5427           | -1.1614          | H             | 6.4949           | -0.4338          | 1.7057           |
| H             | 4.7761           | 2.8045           | 0.586            | H             | 7.0096           | -0.4381          | 0.0125           |
| H             | 7.3125           | 1.1196           | 1.3461           | H             | 6.6793           | 2.6539           | -0.4585          |
| H             | 6.5196           | -0.4571          | 1.4884           | H             | 4.975            | 2.6357           | -0.9383          |
| H             | 5.7667           | 0.9805           | 2.1939           | H             | 6.0927           | 1.4282           | -1.5902          |
| <b>Conf 5</b> | <b>X axis(Å)</b> | <b>Y axis(Å)</b> | <b>Z axis(Å)</b> | <b>Conf 6</b> | <b>X axis(Å)</b> | <b>Y axis(Å)</b> | <b>Z axis(Å)</b> |
| C             | -2.619           | -2.4869          | -1.4922          | C             | -2.4974          | -2.4128          | -1.7111          |
| C             | -3.3218          | -1.8918          | -0.2833          | C             | -3.2752          | -1.93            | -0.498           |
| C             | -2.651           | -0.6043          | 0.2656           | C             | -2.6791          | -0.6619          | 0.1695           |
| C             | -1.1029          | -0.8618          | 0.4874           | C             | -1.1336          | -0.8798          | 0.445            |
| C             | -0.3528          | -1.5595          | -0.6993          | C             | -0.3056          | -1.4649          | -0.7508          |
| C             | -1.1668          | -2.7907          | -1.1689          | C             | -1.0503          | -2.6874          | -1.3422          |
| C             | -0.3409          | 0.3757           | 1.0265           | C             | -0.4441          | 0.3424           | 1.1034           |
| C             | 0.9806           | 0.0293           | 1.7116           | C             | 0.8582           | -0.005           | 1.8239           |
| C             | 2.0826           | -0.3111          | 0.7494           | C             | 2.014            | -0.2376          | 0.8933           |
| C             | 1.9788           | -1.387           | -0.1298          | C             | 1.9903           | -1.2514          | -0.0624          |
| C             | 3.2787           | 0.4283           | 0.7671           | C             | 3.1793           | 0.5396           | 1.0184           |
| C             | 4.361            | 0.0969           | -0.0658          | C             | 4.3093           | 0.3061           | 0.2164           |
| C             | 4.2366           | -1.0103          | -0.9135          | C             | 4.2645           | -0.7416          | -0.7115          |
| C             | 3.0567           | -1.7532          | -0.936           | C             | 3.1158           | -1.5215          | -0.8407          |
| C             | -3.3206          | -0.3731          | 1.6287           | C             | -3.4166          | -0.5517          | 1.5125           |
| O             | -2.8236          | -0.5377          | 2.7313           | O             | -2.9627          | -0.7763          | 2.6232           |
| O             | -4.6175          | -0.0125          | 1.5448           | O             | -4.7214          | -0.2321          | 1.3934           |
| C             | -0.067           | -0.6763          | -1.9355          | C             | 4.00E-04         | -0.4867          | -1.9082          |
| C             | -3.0096          | 0.5911           | -0.65            | C             | -3.0426          | 0.5821           | -0.6768          |
| O             | -2.4931          | 1.8269           | -0.1391          | O             | -2.5973          | 1.7959           | -0.0578          |
| C             | -2.6818          | 2.9015           | -0.9536          | C             | -2.7919          | 2.9184           | -0.8034          |
| O             | -3.2379          | 2.8769           | -2.0417          | O             | -3.2985          | 2.9515           | -1.9153          |
| C             | -2.0999          | 4.1289           | -0.3228          | C             | -2.2866          | 4.1178           | -0.0625          |
| C             | 5.6537           | 0.8935           | -0.0499          | C             | 5.5462           | 1.1708           | 0.3845           |
| C             | 5.4221           | 2.3528           | -0.4503          | C             | 6.7428           | 0.35             | 0.8713           |
| C             | 6.351            | 0.8045           | 1.3097           | C             | 5.8881           | 1.9222           | -0.9047          |
| O             | 0.8692           | -2.1761          | -0.2016          | O             | 0.9159           | -2.0718          | -0.2404          |
| H             | -0.6833          | -3.2488          | -2.042           | H             | -0.5115          | -3.0652          | -2.2213          |
| H             | -1.1323          | -3.5664          | -0.3904          | H             | -1.0205          | -3.5147          | -0.6184          |
| H             | -1.0536          | -1.5964          | 1.3084           | H             | -1.0923          | -1.6686          | 1.2145           |
| H             | -2.6992          | -1.8182          | -2.3547          | H             | -2.565           | -1.6877          | -2.528           |
| H             | -3.1246          | -3.4169          | -1.7785          | H             | -2.9538          | -3.3373          | -2.0845          |
| H             | -3.3532          | -2.6542          | 0.5082           | H             | -3.3121          | -2.7474          | 0.2365           |
| H             | -4.3706          | -1.6978          | -0.5443          | H             | -4.3181          | -1.7551          | -0.7936          |
| H             | -0.1621          | 1.109            | 0.2336           | H             | -0.2588          | 1.1358           | 0.3724           |
| H             | -0.955           | 0.8826           | 1.7791           | H             | -1.1098          | 0.7727           | 1.8598           |
| H             | 0.8511           | -0.7969          | 2.4215           | H             | 0.7291           | -0.8834          | 2.4683           |
| H             | 1.281            | 0.8961           | 2.3144           | H             | 1.0982           | 0.827            | 2.4986           |
| H             | 3.3718           | 1.269            | 1.4523           | H             | 3.2112           | 1.3329           | 1.7635           |
| H             | 5.0584           | -1.3084          | -1.5601          | H             | 5.1241           | -0.9656          | -1.3382          |
| H             | 2.972            | -2.6159          | -1.5908          | H             | 3.0931           | -2.338           | -1.5571          |
| H             | -4.9014          | 0.0628           | 2.481            | H             | -5.049           | -0.2335          | 2.3182           |

|               |                  |                  |                  |               |                  |                  |                  |
|---------------|------------------|------------------|------------------|---------------|------------------|------------------|------------------|
| H             | -0.9668          | -0.3921          | -2.4797          | H             | -0.8847          | -0.1964          | -2.4728          |
| H             | 0.4661           | 0.2442           | -1.6823          | H             | 0.4863           | 0.4317           | -1.5673          |
| H             | 0.5728           | -1.2127          | -2.6473          | H             | 0.6911           | -0.9485          | -2.6247          |
| H             | -2.6273          | 0.4357           | -1.6597          | H             | -2.6102          | 0.5124           | -1.6758          |
| H             | -4.0987          | 0.6949           | -0.7413          | H             | -4.1298          | 0.6535           | -0.8117          |
| H             | -1.0248          | 3.9961           | -0.1778          | H             | -1.2145          | 4.0136           | 0.1229           |
| H             | -2.26            | 4.9862           | -0.9828          | H             | -2.4508          | 5.0137           | -0.6679          |
| H             | -2.5958          | 4.326            | 0.6309           | H             | -2.8312          | 4.2286           | 0.8785           |
| H             | 6.3381           | 0.4625           | -0.7927          | H             | 5.341            | 1.9289           | 1.1521           |
| H             | 6.3751           | 2.8887           | -0.518           | H             | 7.6023           | 1.0007           | 1.0659           |
| H             | 4.931            | 2.4173           | -1.4277          | H             | 6.5036           | -0.1767          | 1.8019           |
| H             | 4.7943           | 2.8827           | 0.2743           | H             | 7.0531           | -0.3989          | 0.1344           |
| H             | 7.3201           | 1.3144           | 1.2792           | H             | 6.7289           | 2.6048           | -0.7405          |
| H             | 6.5302           | -0.2394          | 1.5902           | H             | 5.035            | 2.5177           | -1.2486          |
| H             | 5.7573           | 1.2666           | 2.1059           | H             | 6.1676           | 1.2403           | -1.7152          |
| <b>Conf 7</b> | <b>X axis(Å)</b> | <b>Y axis(Å)</b> | <b>Z axis(Å)</b> | <b>Conf 8</b> | <b>X axis(Å)</b> | <b>Y axis(Å)</b> | <b>Z axis(Å)</b> |
| C             | -2.3999          | -1.7331          | -1.8943          | C             | -2.336           | -2.0916          | -1.6289          |
| C             | -3.0104          | -1.6447          | -0.5073          | C             | -2.9798          | -1.7476          | -0.296           |
| C             | -2.2963          | -0.6373          | 0.4263           | C             | -2.2924          | -0.5646          | 0.44             |
| C             | -0.7364          | -0.9059          | 0.4304           | C             | -0.7344          | -0.8063          | 0.5275           |
| C             | -0.0811          | -1.108           | -0.9806          | C             | -0.0412          | -1.2774          | -0.7976          |
| C             | -0.9302          | -2.1115          | -1.7996          | C             | -0.8653          | -2.4257          | -1.4313          |
| C             | 0.0301           | 0.1193           | 1.3048           | C             | 0.0079           | 0.3733           | 1.2041           |
| C             | 1.4193           | -0.3604          | 1.7223           | C             | 1.3938           | 0.0034           | 1.7326           |
| C             | 2.4388           | -0.3226          | 0.6193           | C             | 2.4383           | -0.1753          | 0.6687           |
| C             | 2.2826           | -1.0568          | -0.5555          | C             | 2.3116           | -1.1359          | -0.3333          |
| C             | 3.6233           | 0.4157           | 0.795            | C             | 3.6175           | 0.5901           | 0.7172           |
| C             | 4.6427           | 0.4155           | -0.1724          | C             | 4.6605           | 0.3964           | -0.2048          |
| C             | 4.4689           | -0.3597          | -1.3248          | C             | 4.5158           | -0.6007          | -1.1765          |
| C             | 3.301            | -1.0989          | -1.5085          | C             | 3.3531           | -1.3682          | -1.2322          |
| C             | -2.8481          | -0.9544          | 1.8259           | C             | -2.837           | -0.6096          | 1.8773           |
| O             | -2.271           | -1.5437          | 2.7258           | O             | -2.9746          | -1.6127          | 2.5619           |
| O             | -4.1235          | -0.5633          | 2.0148           | O             | -3.1217          | 0.5871           | 2.4218           |
| C             | 0.1006           | 0.1595           | -1.8494          | C             | 0.1724           | -0.1998          | -1.8878          |
| C             | -2.6233          | 0.8479           | 0.1287           | C             | -2.6681          | 0.785            | -0.2174          |
| O             | -3.9447          | 1.0017           | -0.4153          | O             | -4.0973          | 0.9004           | -0.3558          |
| C             | -4.3412          | 2.2917           | -0.5864          | C             | -4.517           | 2.0719           | -0.9078          |
| O             | -3.6625          | 3.2793           | -0.3438          | O             | -3.7884          | 2.9721           | -1.2993          |
| C             | -5.7373          | 2.3314           | -1.1266          | C             | -6.0128          | 2.0987           | -0.9764          |
| C             | 5.9214           | 1.2128           | 0.015            | C             | 5.9336           | 1.2226           | -0.1553          |
| C             | 5.6391           | 2.7128           | 0.1323           | C             | 5.6475           | 2.713            | -0.356           |
| C             | 6.7233           | 0.7125           | 1.2189           | C             | 6.7063           | 0.9853           | 1.1445           |
| O             | 1.1797           | -1.8162          | -0.8172          | O             | 1.2133           | -1.9353          | -0.4599          |
| H             | -0.512           | -2.2208          | -2.809           | H             | -0.422           | -2.7193          | -2.3921          |
| H             | -0.8456          | -3.1114          | -1.3505          | H             | -0.7848          | -3.3219          | -0.7996          |
| H             | -0.603           | -1.8751          | 0.9379           | H             | -0.6122          | -1.6512          | 1.2257           |
| H             | -2.5367          | -0.7909          | -2.4337          | H             | -2.4675          | -1.2746          | -2.3447          |
| H             | -2.93            | -2.4994          | -2.4722          | H             | -2.8455          | -2.962           | -2.0593          |
| H             | -2.9706          | -2.6464          | -0.0546          | H             | -2.9407          | -2.6513          | 0.328            |
| H             | -4.0803          | -1.42            | -0.5959          | H             | -4.0488          | -1.553           | -0.4452          |
| H             | 0.0974           | 1.0938           | 0.809            | H             | 0.0727           | 1.2377           | 0.5345           |
| H             | -0.5299          | 0.2963           | 2.2305           | H             | -0.5671          | 0.7093           | 2.0739           |
| H             | 1.3733           | -1.3767          | 2.1331           | H             | 1.345            | -0.9085          | 2.3409           |
| H             | 1.7557           | 0.2788           | 2.549            | H             | 1.7087           | 0.8003           | 2.4189           |
| H             | 3.7588           | 0.9903           | 1.7097           | H             | 3.7305           | 1.3413           | 1.497            |
| H             | 5.2424           | -0.3993          | -2.0881          | H             | 5.3078           | -0.7921          | -1.8965          |
| H             | 3.1776           | -1.7026          | -2.4034          | H             | 3.2516           | -2.1434          | -1.9867          |
| H             | -4.3341          | -0.8659          | 2.9237           | H             | -3.432           | 0.3659           | 3.3258           |
| H             | -0.8434          | 0.5773           | -2.2024          | H             | -0.7534          | 0.129            | -2.359           |
| H             | 0.6377           | 0.9562           | -1.3272          | H             | 0.6811           | 0.6908           | -1.5088          |
| H             | 0.693            | -0.0724          | -2.7433          | H             | 0.805            | -0.5933          | -2.6934          |



|               |                  |                  |                  |                |                  |                  |                  |
|---------------|------------------|------------------|------------------|----------------|------------------|------------------|------------------|
| H             | -2.5446          | 1.4444           | 1.0476           | H              | -2.3016          | 1.6341           | 0.3716           |
| H             | -1.9279          | 1.2722           | -0.5949          | H              | -2.2421          | 0.8642           | -1.2168          |
| H             | -6.4192          | 1.841            | -0.4275          | H              | -6.4316          | 2.0097           | 0.0291           |
| H             | -6.0505          | 3.3726           | -1.2455          | H              | -6.3389          | 3.0503           | -1.4058          |
| H             | -5.7703          | 1.843            | -2.1037          | H              | -6.3688          | 1.2868           | -1.6154          |
| H             | 6.5521           | 1.0743           | -0.8732          | H              | 6.5859           | 0.9078           | -0.9808          |
| H             | 6.5763           | 3.2779           | 0.1786           | H              | 6.5829           | 3.2809           | -0.4049          |
| H             | 5.0727           | 3.0733           | -0.7337          | H              | 5.1021           | 2.8843           | -1.2908          |
| H             | 5.0622           | 2.953            | 1.0319           | H              | 5.0487           | 3.1299           | 0.461            |
| H             | 7.6798           | 1.2415           | 1.2909           | H              | 7.6603           | 1.5233           | 1.1287           |
| H             | 6.9383           | -0.3581          | 1.1285           | H              | 6.9243           | -0.0798          | 1.2815           |
| H             | 6.1866           | 0.8664           | 2.1615           | H              | 6.1467           | 1.3267           | 2.0222           |
| <b>Conf 9</b> | <b>X axis(Å)</b> | <b>Y axis(Å)</b> | <b>Z axis(Å)</b> | <b>Conf 10</b> | <b>X axis(Å)</b> | <b>Y axis(Å)</b> | <b>Z axis(Å)</b> |
| C             | 2.3229           | -1.1304          | 2.3269           | C              | -2.258           | -1.5888          | -2.1417          |
| C             | 3.0003           | -1.4298          | 1.0019           | C              | -2.9659          | -1.6127          | -0.797           |
| C             | 2.3446           | -0.7219          | -0.2087          | C              | -2.337           | -0.6571          | 0.2541           |
| C             | 0.7834           | -0.9826          | -0.2155          | C              | -0.7792          | -0.8975          | 0.3488           |
| C             | 0.0588           | -0.7858          | 1.1619           | C              | -0.0196          | -0.9978          | -1.0191          |
| C             | 0.8547           | -1.5216          | 2.2681           | C              | -0.7901          | -1.9481          | -1.9691          |
| C             | 0.0729           | -0.2412          | -1.3768          | C              | -0.0928          | 0.0709           | 1.3445           |
| C             | -1.3008          | -0.8194          | -1.7133          | C              | 1.2769           | -0.4106          | 1.8227           |
| C             | -2.3715          | -0.4781          | -0.7161          | C              | 2.3699           | -0.2936          | 0.7997           |
| C             | -2.281           | -0.8569          | 0.6226           | C              | 2.3074           | -0.9591          | -0.4235          |
| C             | -3.5369          | 0.181            | -1.148           | C              | 3.529            | 0.4439           | 1.1022           |
| C             | -4.6014          | 0.4482           | -0.2704          | C              | 4.6145           | 0.5091           | 0.212            |
| C             | -4.4926          | 0.024            | 1.0593           | C              | 4.5334           | -0.1995          | -0.9927          |
| C             | -3.3442          | -0.6337          | 1.4982           | C              | 3.3913           | -0.937           | -1.3017          |
| C             | 2.9588           | -1.4145          | -1.4363          | C              | -2.9416          | -1.0827          | 1.6023           |
| O             | 2.4179           | -2.2309          | -2.1651          | O              | -3.0862          | -2.2316          | 1.9937           |
| O             | 4.2468           | -1.0902          | -1.6627          | O              | -3.2758          | -0.0735          | 2.4266           |
| C             | -0.1481          | 0.673            | 1.635            | C              | 0.2167           | 0.33             | -1.7784          |
| C             | 2.676            | 0.7878           | -0.3189          | C              | -2.7139          | 0.8138           | -0.0447          |
| O             | 3.9716           | 1.0879           | 0.226            | O              | -4.138           | 0.947            | -0.2153          |
| C             | 4.376            | 2.3752           | 0.0519           | C              | -4.5595          | 2.2179           | -0.4609          |
| O             | 3.7225           | 3.2558           | -0.4885          | O              | -3.8349          | 3.1966           | -0.5685          |
| C             | 5.745            | 2.5647           | 0.6285           | C              | -6.0512          | 2.2467           | -0.5907          |
| C             | -5.8395          | 1.1641           | -0.7811          | C              | 5.8449           | 1.3197           | 0.5798           |
| C             | -7.0786          | 0.2693           | -0.6993          | C              | 7.0804           | 0.4283           | 0.7273           |
| C             | -6.0709          | 2.4855           | -0.0438          | C              | 6.1005           | 2.4444           | -0.4267          |
| O             | -1.2017          | -1.5127          | 1.1389           | O              | 1.2335           | -1.7084          | -0.8063          |
| H             | 0.3872           | -1.3468          | 3.2462           | H              | -0.2996          | -1.9751          | -2.9512          |
| H             | 0.7789           | -2.6069          | 2.1103           | H              | -0.717           | -2.9777          | -1.5905          |
| H             | 0.6621           | -2.0548          | -0.4403          | H              | -0.6684          | -1.8946          | 0.8068           |
| H             | 2.4458           | -0.0752          | 2.59             | H              | -2.3767          | -0.614           | -2.6244          |
| H             | 2.8149           | -1.7056          | 3.1202           | H              | -2.7292          | -2.3211          | -2.8081          |
| H             | 2.9694           | -2.5179          | 0.8434           | H              | -2.9336          | -2.6479          | -0.4298          |
| H             | 4.0675           | -1.1882          | 1.0776           | H              | -4.0315          | -1.3966          | -0.9405          |
| H             | -0.0057          | 0.8325           | -1.1747          | H              | -0.0185          | 1.0812           | 0.9279           |
| H             | 0.6788           | -0.3276          | -2.2863          | H              | -0.7119          | 0.1613           | 2.2437           |
| H             | -1.2481          | -1.9098          | -1.8234          | H              | 1.2222           | -1.4505          | 2.1686           |
| H             | -1.589           | -0.4352          | -2.7004          | H              | 1.5445           | 0.1817           | 2.7075           |
| H             | -3.6223          | 0.4797           | -2.1918          | H              | 3.593            | 0.9662           | 2.0555           |
| H             | -5.3013          | 0.1961           | 1.7651           | H              | 5.3587           | -0.1887          | -1.7001          |
| H             | -3.2714          | -0.9649          | 2.5305           | H              | 3.3393           | -1.4882          | -2.2367          |
| H             | 4.4967           | -1.633           | -2.4404          | H              | -3.6196          | -0.5271          | 3.2257           |
| H             | 0.7832           | 1.1733           | 1.9046           | H              | -0.6951          | 0.7615           | -2.1904          |
| H             | -0.6493          | 1.2928           | 0.8865           | H              | 0.6888           | 1.0952           | -1.1563          |
| H             | -0.7855          | 0.6977           | 2.5277           | H              | 0.8918           | 0.1679           | -2.6281          |
| H             | 2.6491           | 1.1058           | -1.3699          | H              | -2.3918          | 1.4825           | 0.7625           |
| H             | 1.9522           | 1.3957           | 0.2233           | H              | -2.2473          | 1.1565           | -0.9673          |
| H             | 6.4534           | 1.9              | 0.1276           | H              | -6.5107          | 1.8928           | 0.3356           |

|                |                  |                  |                  |                |                  |                  |                  |
|----------------|------------------|------------------|------------------|----------------|------------------|------------------|------------------|
| H              | 6.0655           | 3.5982           | 0.4693           | H              | -6.3795          | 3.2743           | -0.7712          |
| H              | 5.725            | 2.3668           | 1.7031           | H              | -6.3614          | 1.6272           | -1.4358          |
| H              | -5.6887          | 1.4106           | -1.8405          | H              | 5.6718           | 1.7953           | 1.5543           |
| H              | -7.9447          | 0.7695           | -1.1462          | H              | 7.9391           | 1.0147           | 1.0721           |
| H              | -6.919           | -0.6707          | -1.2392          | H              | 6.9033           | -0.3684          | 1.4584           |
| H              | -7.3364          | 0.02             | 0.3358           | H              | 7.3599           | -0.0447          | -0.2204          |
| H              | -6.9155          | 3.0278           | -0.4826          | H              | 6.9381           | 3.07             | -0.0997          |
| H              | -5.1876          | 3.1305           | -0.11            | H              | 5.2197           | 3.0886           | -0.5257          |
| H              | -6.2919          | 2.33             | 1.0177           | H              | 6.3444           | 2.057            | -1.4219          |
| <b>Conf 11</b> | <b>X axis(Å)</b> | <b>Y axis(Å)</b> | <b>Z axis(Å)</b> | <b>Conf 12</b> | <b>X axis(Å)</b> | <b>Y axis(Å)</b> | <b>Z axis(Å)</b> |
| C              | -2.5275          | -0.8528          | 2.112            | C              | -2.4509          | -0.7113          | 2.1957           |
| C              | -3.0847          | 0.3578           | 1.3814           | C              | -3.0798          | 0.4153           | 1.3926           |
| C              | -2.2898          | 0.7259           | 0.1013           | C              | -2.3456          | 0.7059           | 0.0575           |
| C              | -0.7453          | 0.8238           | 0.4155           | C              | -0.7959          | 0.8836           | 0.303            |
| C              | -0.1494          | -0.3477          | 1.2705           | C              | -0.1255          | -0.1926          | 1.2255           |
| C              | -1.0713          | -0.6171          | 2.486            | C              | -0.9925          | -0.3946          | 2.4933           |
| C              | 0.0907           | 1.131            | -0.8518          | C              | -0.0177          | 1.1159           | -1.016           |
| C              | 1.4783           | 1.6943           | -0.5465          | C              | 1.3572           | 1.751            | -0.8104          |
| C              | 2.4568           | 0.6858           | -0.0166          | C              | 2.392            | 0.8243           | -0.2396          |
| C              | 2.2272           | -0.0139          | 1.1672           | C              | 2.2315           | 0.2155           | 1.0043           |
| C              | 3.6787           | 0.4874           | -0.6851          | C              | 3.5963           | 0.6157           | -0.9364          |
| C              | 4.6627           | -0.3803          | -0.181           | C              | 4.6301           | -0.1726          | -0.4028          |
| C              | 4.4144           | -1.0405          | 1.0279           | C              | 4.4501           | -0.7411          | 0.8638           |
| C              | 3.2089           | -0.8491          | 1.7017           | C              | 3.2627           | -0.5382          | 1.5658           |
| C              | -2.7695          | 2.1164           | -0.3475          | C              | -2.8939          | 2.0374           | -0.4824          |
| O              | -3.1324          | 2.4462           | -1.4653          | O              | -3.3085          | 2.262            | -1.6083          |
| O              | -2.7154          | 3.0521           | 0.622            | O              | -2.8416          | 3.0501           | 0.4063           |
| C              | 0.0698           | -1.6978          | 0.5464           | C              | 0.1196           | -1.5886          | 0.6039           |
| C              | -2.6016          | -0.2455          | -1.0665          | C              | -2.6613          | -0.3679          | -1.0159          |
| O              | -4.0222          | -0.4586          | -1.203           | O              | -4.0766          | -0.6414          | -1.0801          |
| C              | -4.4676          | -1.7426          | -1.1609          | C              | -4.4707          | -1.9327          | -0.9186          |
| O              | -3.776           | -2.735           | -0.9868          | O              | -3.7358          | -2.8826          | -0.6926          |
| C              | -5.9541          | -1.7708          | -1.3451          | C              | -5.9606          | -2.0282          | -1.0424          |
| C              | 5.9814           | -0.5973          | -0.9022          | C              | 5.9119           | -0.3723          | -1.1921          |
| C              | 5.7702           | -1.1858          | -2.2994          | C              | 7.1168           | 0.2342           | -0.4687          |
| C              | 6.8019           | 0.6929           | -0.9715          | C              | 6.1536           | -1.8501          | -1.5102          |
| O              | 1.0814           | 0.1152           | 1.8968           | O              | 1.1082           | 0.363            | 1.7648           |
| H              | -0.6948          | -1.4749          | 3.059            | H              | -0.5633          | -1.189           | 3.1182           |
| H              | -1.0136          | 0.2324           | 3.1814           | H              | -0.9428          | 0.5103           | 3.1157           |
| H              | -0.6297          | 1.7172           | 1.0502           | H              | -0.6921          | 1.8292           | 0.8593           |
| H              | -2.6424          | -1.7567          | 1.5069           | H              | -2.5526          | -1.6649          | 1.6698           |
| H              | -3.1091          | -1.0189          | 3.0265           | H              | -2.9929          | -0.8229          | 3.1424           |
| H              | -3.0719          | 1.1959           | 2.0908           | H              | -3.0739          | 1.3084           | 2.0316           |
| H              | -4.1461          | 0.1981           | 1.1581           | H              | -4.1416          | 0.2006           | 1.2239           |
| H              | 0.1699           | 0.2501           | -1.498           | H              | 0.0722           | 0.1886           | -1.5922          |
| H              | -0.4253          | 1.8944           | -1.4458          | H              | -0.5834          | 1.8097           | -1.6489          |
| H              | 1.4094           | 2.5298           | 0.1616           | H              | 1.2814           | 2.6384           | -0.1695          |
| H              | 1.8708           | 2.1262           | -1.4763          | H              | 1.6996           | 2.1193           | -1.7863          |
| H              | 3.8721           | 1.0303           | -1.6087          | H              | 3.7371           | 1.0875           | -1.9077          |
| H              | 5.1578           | -1.7072          | 1.4585           | H              | 5.2323           | -1.3436          | 1.3187           |
| H              | 3.0266           | -1.3626          | 2.6418           | H              | 3.1336           | -0.9798          | 2.5502           |
| H              | -3.0286          | 3.8708           | 0.1823           | H              | -3.2013          | 3.8188           | -0.0852          |
| H              | -0.8592          | -2.2135          | 0.3028           | H              | -0.7971          | -2.155           | 0.4384           |
| H              | 0.6401           | -1.5925          | -0.3806          | H              | 0.652            | -1.5391          | -0.3498          |
| H              | 0.6439           | -2.3829          | 1.1828           | H              | 0.7417           | -2.1988          | 1.2705           |
| H              | -2.2614          | 0.1642           | -2.0247          | H              | -2.3713          | -0.0258          | -2.0162          |
| H              | -2.0785          | -1.1913          | -0.9469          | H              | -2.0984          | -1.2817          | -0.8411          |
| H              | -6.4387          | -1.2357          | -0.5247          | H              | -6.2751          | -1.6691          | -2.0256          |
| H              | -6.2175          | -1.3226          | -2.3065          | H              | -6.2665          | -3.0734          | -0.9407          |
| H              | -6.3004          | -2.8082          | -1.3396          | H              | -6.4358          | -1.4457          | -0.2492          |
| H              | 6.5738           | -1.3266          | -0.3337          | H              | 5.8157           | 0.1505           | -2.153           |

|   |        |         |         |   |        |         |         |
|---|--------|---------|---------|---|--------|---------|---------|
| H | 6.7327 | -1.4166 | -2.7688 | H | 8.0172 | 0.1547  | -1.0874 |
| H | 5.1904 | -2.1143 | -2.2495 | H | 6.9505 | 1.2957  | -0.2536 |
| H | 5.2364 | -0.4941 | -2.96   | H | 7.3208 | -0.2708 | 0.4817  |
| H | 7.7829 | 0.5014  | -1.4197 | H | 7.0337 | -1.9664 | -2.1518 |
| H | 6.9659 | 1.1069  | 0.0297  | H | 5.2954 | -2.2825 | -2.0366 |
| H | 6.3061 | 1.4622  | -1.5734 | H | 6.3226 | -2.4425 | -0.6044 |

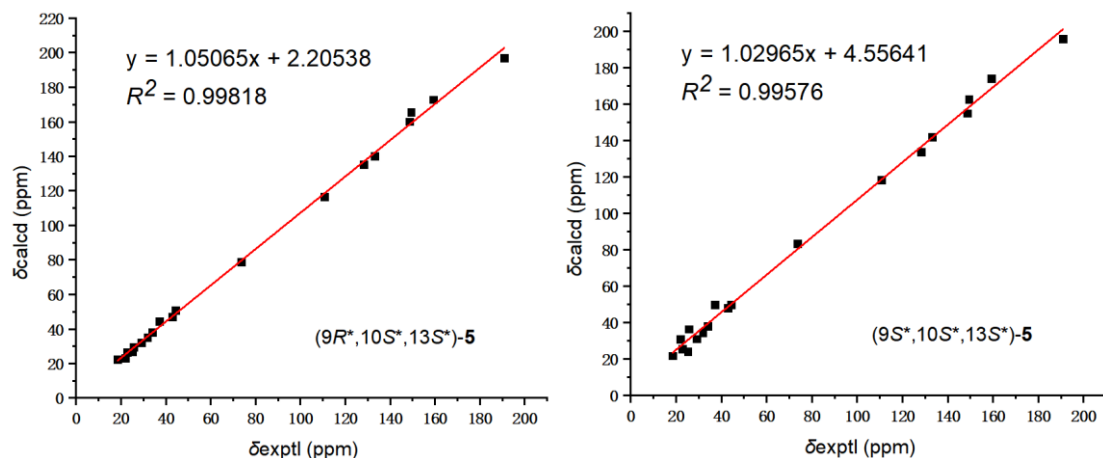

**Figure S5.** Regression analysis of experimental versus calculated  $^{13}\text{C}$  NMR chemical shifts of (9*R*,10*S*,13*S*)-**5** and (9*S*,10*S*,13*S*)-**5** at the mPW1PW91/6-311+G(d,p) level.

| Functional       | Solvent? |          | Basis Set     |          | Type of Data    |          |
|------------------|----------|----------|---------------|----------|-----------------|----------|
| mPW1PW91         | PCM      |          | 6-311+G(d, p) |          | Unscaled Shifts |          |
|                  | Isomer 1 | Isomer 2 | Isomer 3      | Isomer 4 | Isomer 5        | Isomer 6 |
| sDP4+ (H data)   | 100.00%  | 0.00%    | —             | —        | —               | —        |
| sDP4+ (C data)   | 100.00%  | 0.00%    | —             | —        | —               | —        |
| sDP4+ (all data) | 100.00%  | 0.00%    | —             | —        | —               | —        |
| uDP4+ (H data)   | 10.19%   | 89.81%   | —             | —        | —               | —        |
| uDP4+ (C data)   | 100.00%  | 0.00%    | —             | —        | —               | —        |
| uDP4+ (all data) | 100.00%  | 0.00%    | —             | —        | —               | —        |
| DP4+ (H data)    | 100.00%  | 0.00%    | —             | —        | —               | —        |
| DP4+ (C data)    | 100.00%  | 0.00%    | —             | —        | —               | —        |
| DP4+ (all data)  | 100.00%  | 0.00%    | —             | —        | —               | —        |

**Figure S6.** DP4+ results of candidate (9*R*,10*S*,13*S*)-**5** (Isomer 1) and (9*S*,10*S*,13*S*)-**5** (Isomer 2).

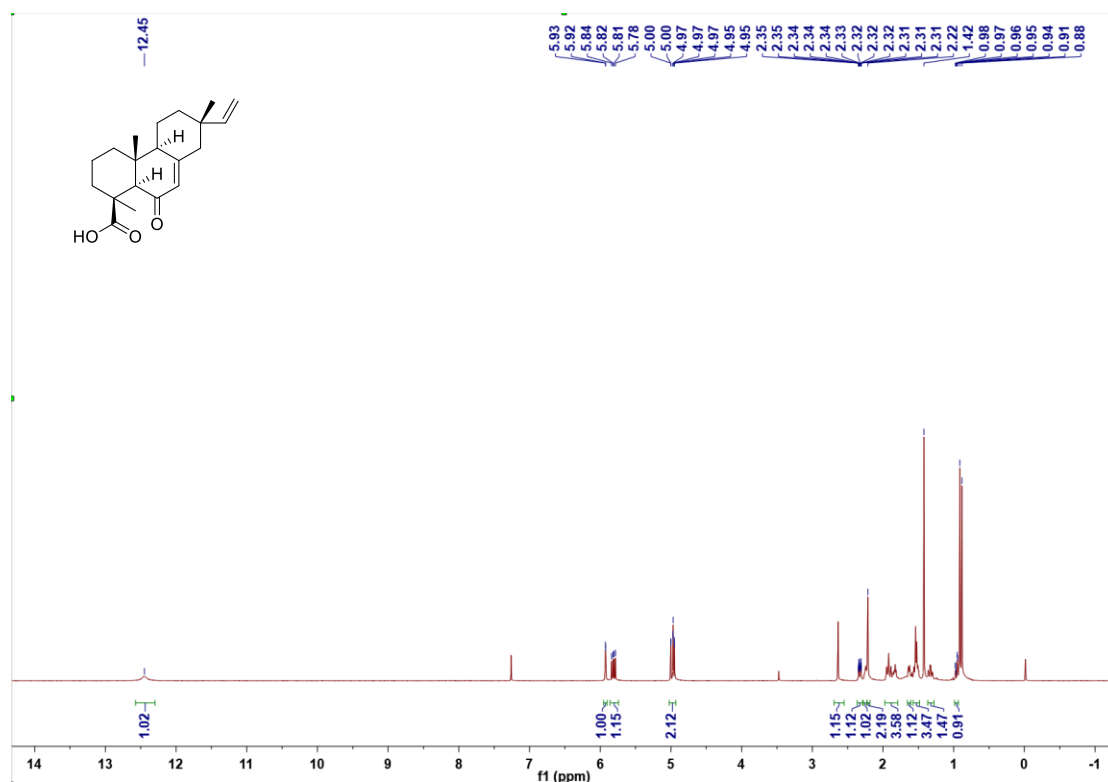

**Figure S7.** <sup>1</sup>H NMR (600 MHz) spectrum of **1** in CDCl<sub>3</sub>.

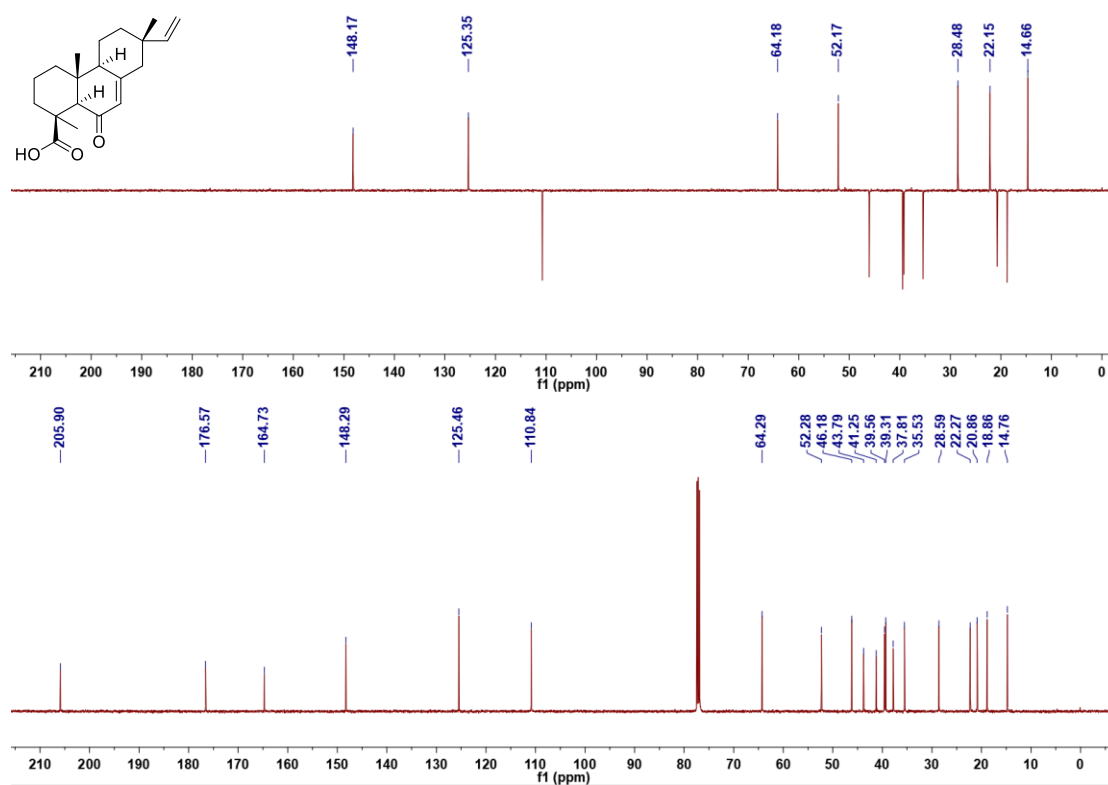

**Figure S8.** <sup>13</sup>C NMR and DEPT (150 MHz) spectra of **1** in CDCl<sub>3</sub>.

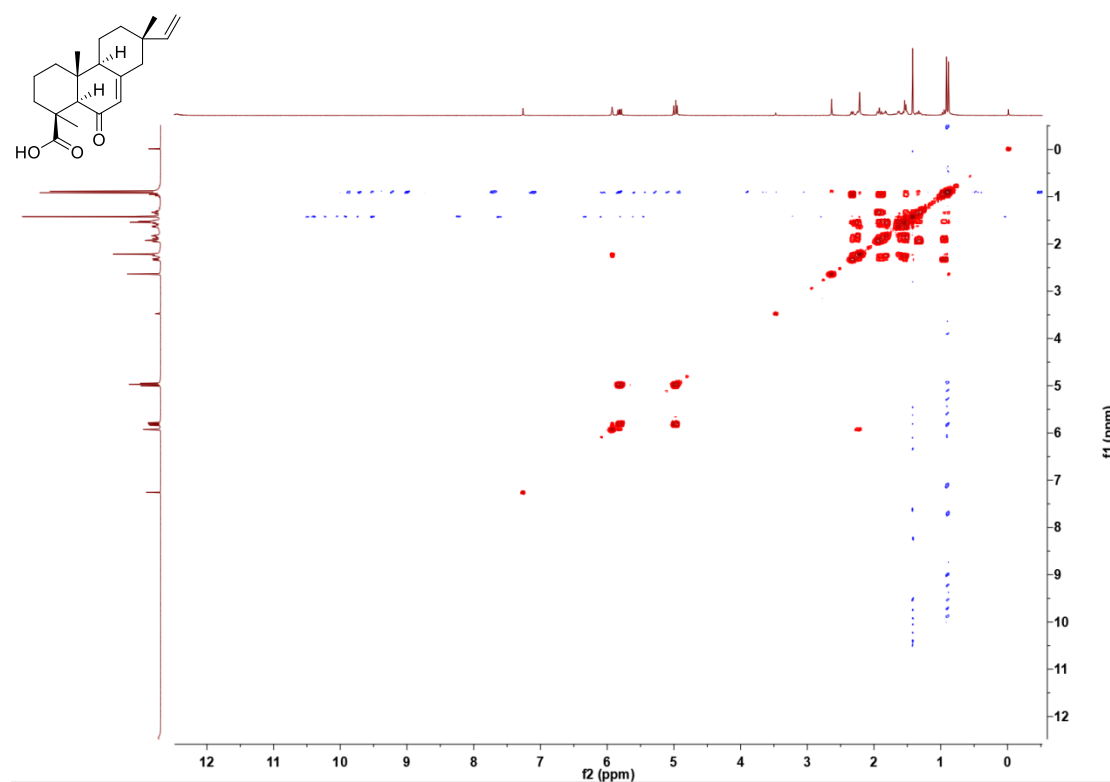

**Figure S9.**  $^1\text{H}$ - $^1\text{H}$  COSY (600 MHz) spectrum of **1** in  $\text{CDCl}_3$ .

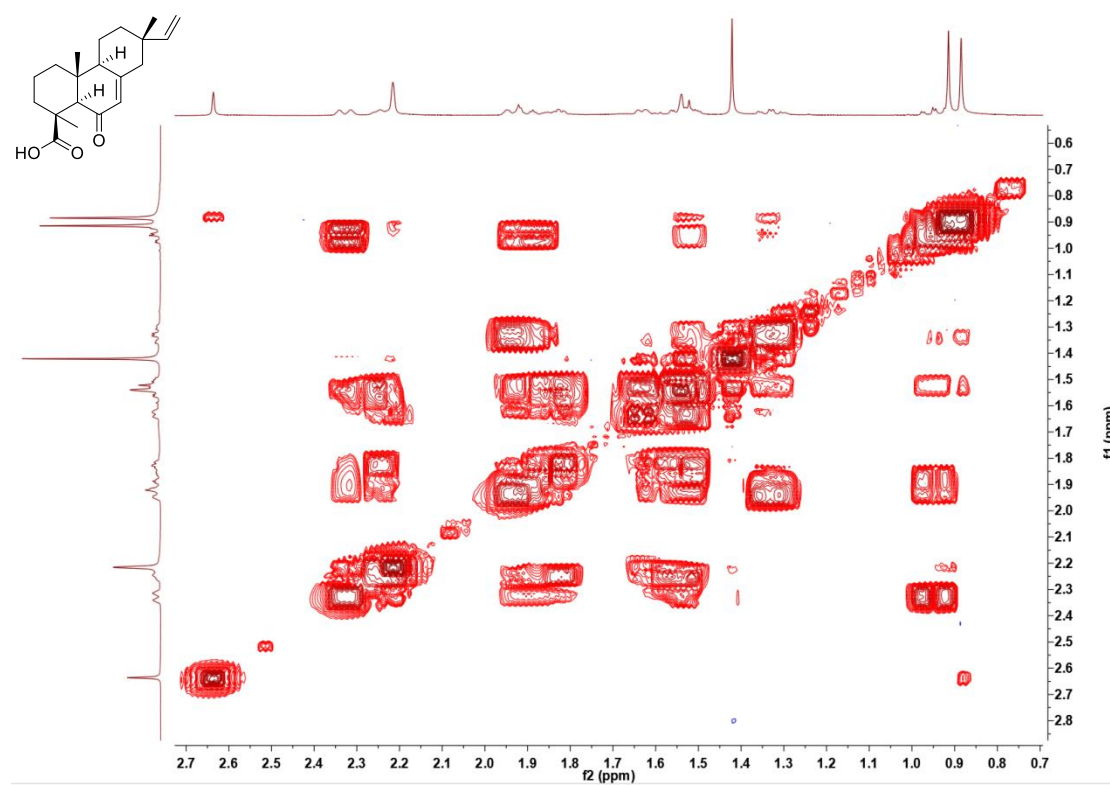

**Figure S10.** Enlarged  $^1\text{H}$ - $^1\text{H}$  COSY (600 MHz) spectrum of **1** in  $\text{CDCl}_3$ .

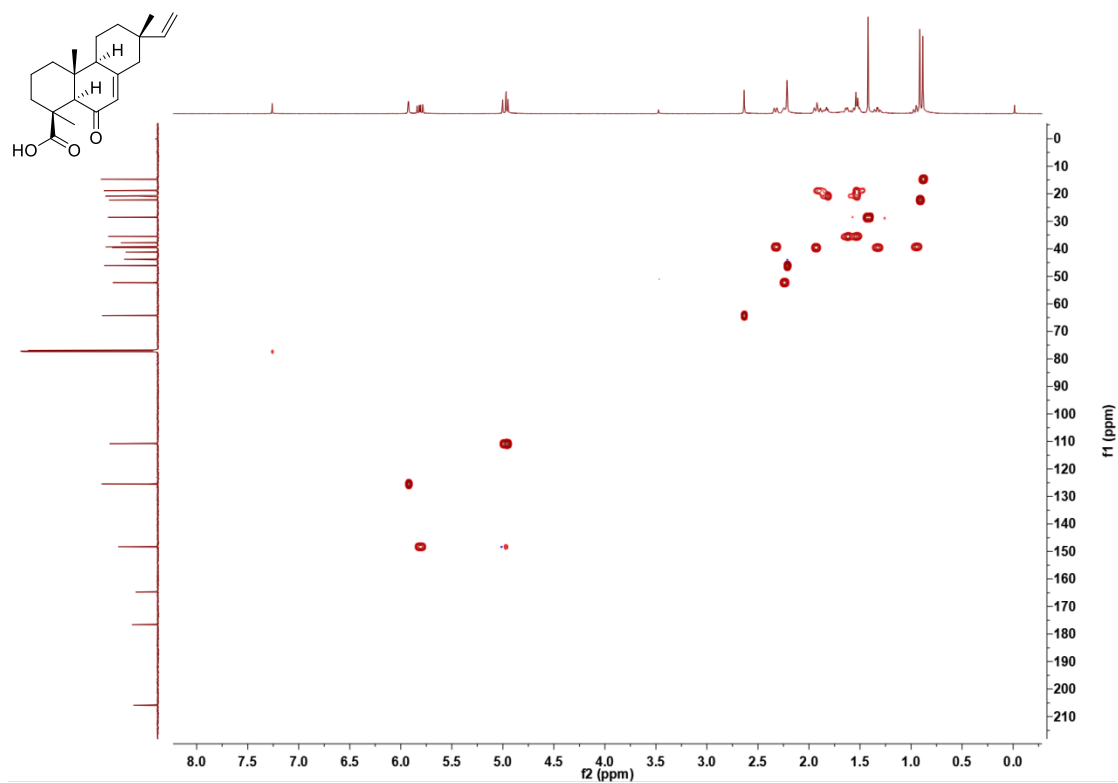

**Figure S11.** HSQC (600 MHz) spectrum of **1** in  $\text{CDCl}_3$ .

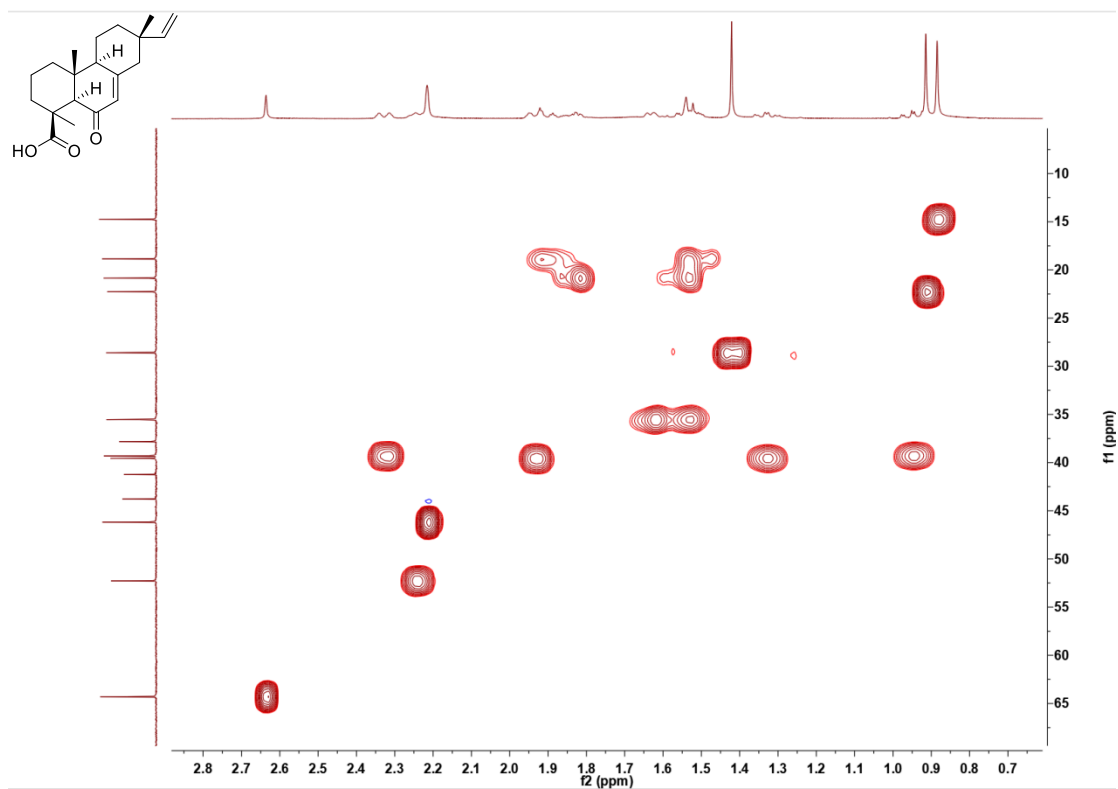

**Figure S12.** Enlarged HSQC (600 MHz) spectrum of **1** in  $\text{CDCl}_3$ .

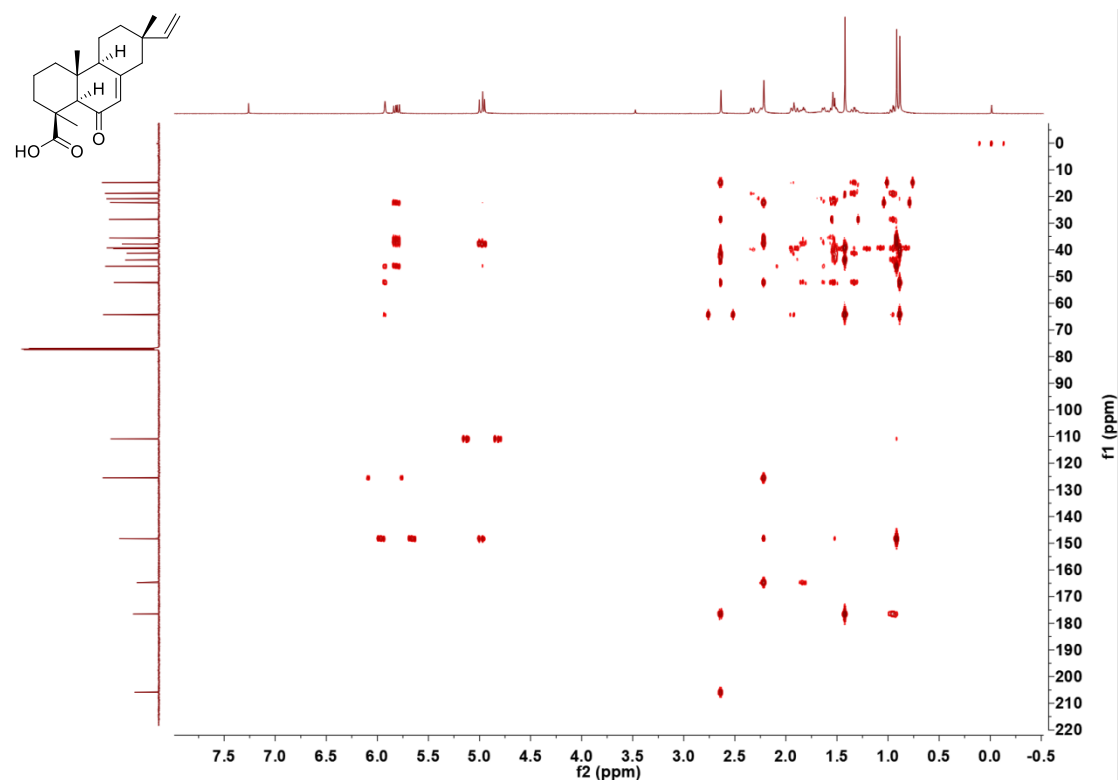

**Figure S13.** HMBC (600 MHz) spectrum of **1** in  $\text{CDCl}_3$ .

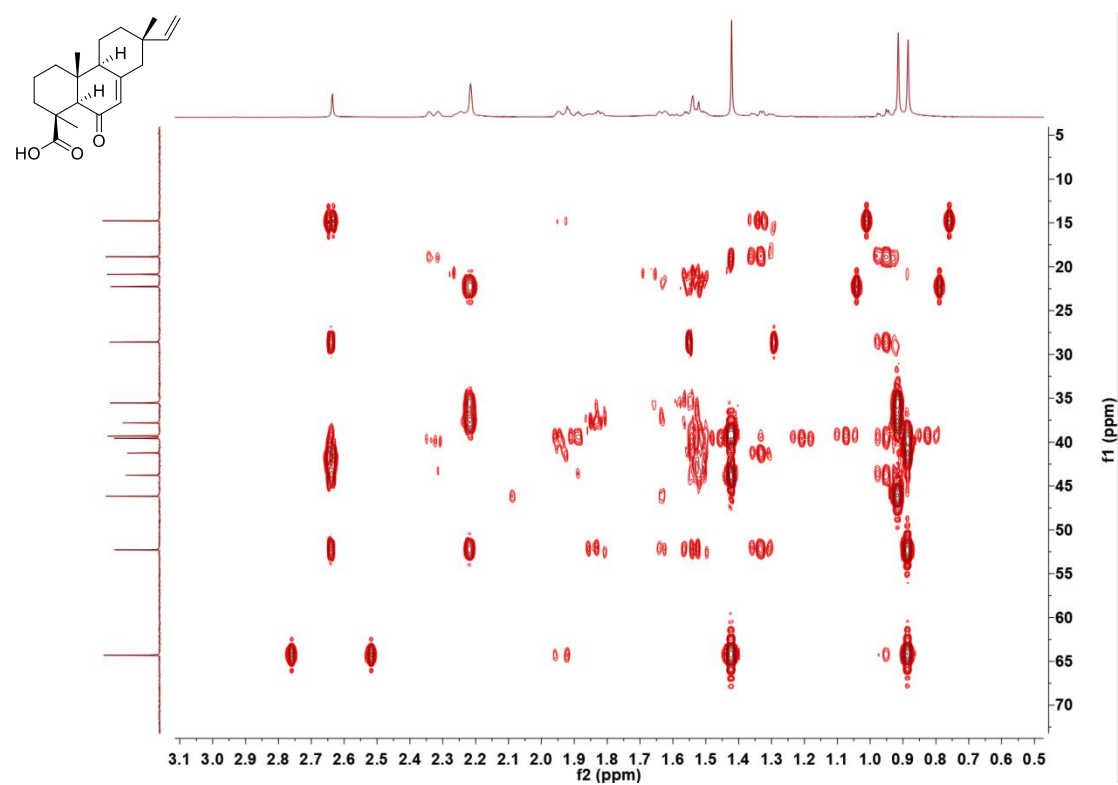

**Figure S14.** Enlarged HMBC (600 MHz) spectrum of **1** in  $\text{CDCl}_3$ .

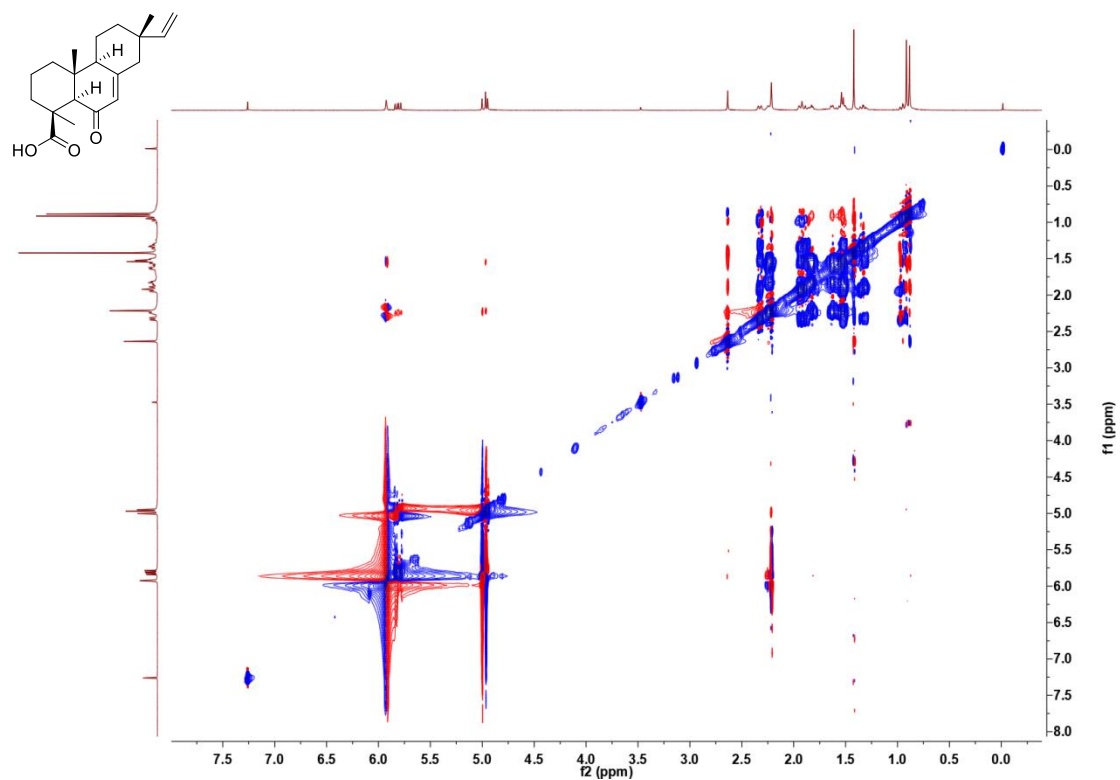

**Figure S15.** ROESY (600 MHz) spectrum of **1** in CDCl<sub>3</sub>.

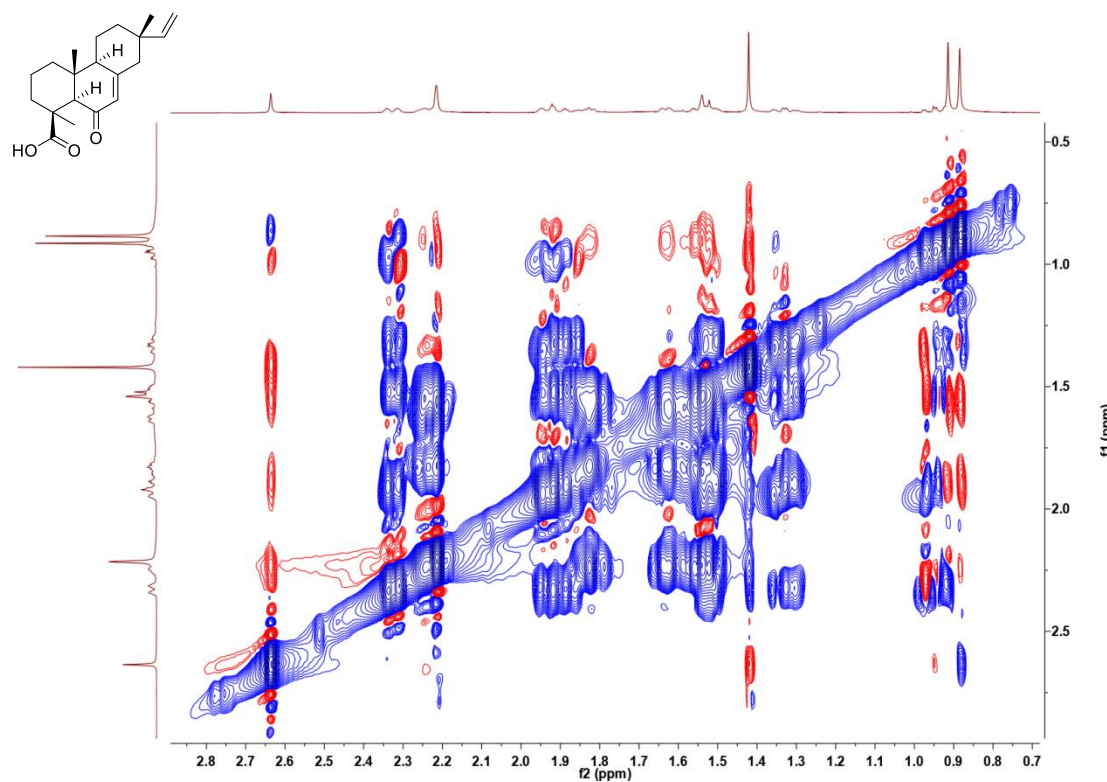

**Figure S16.** Enlarged ROESY (600 MHz) spectrum of **1** in CDCl<sub>3</sub>.



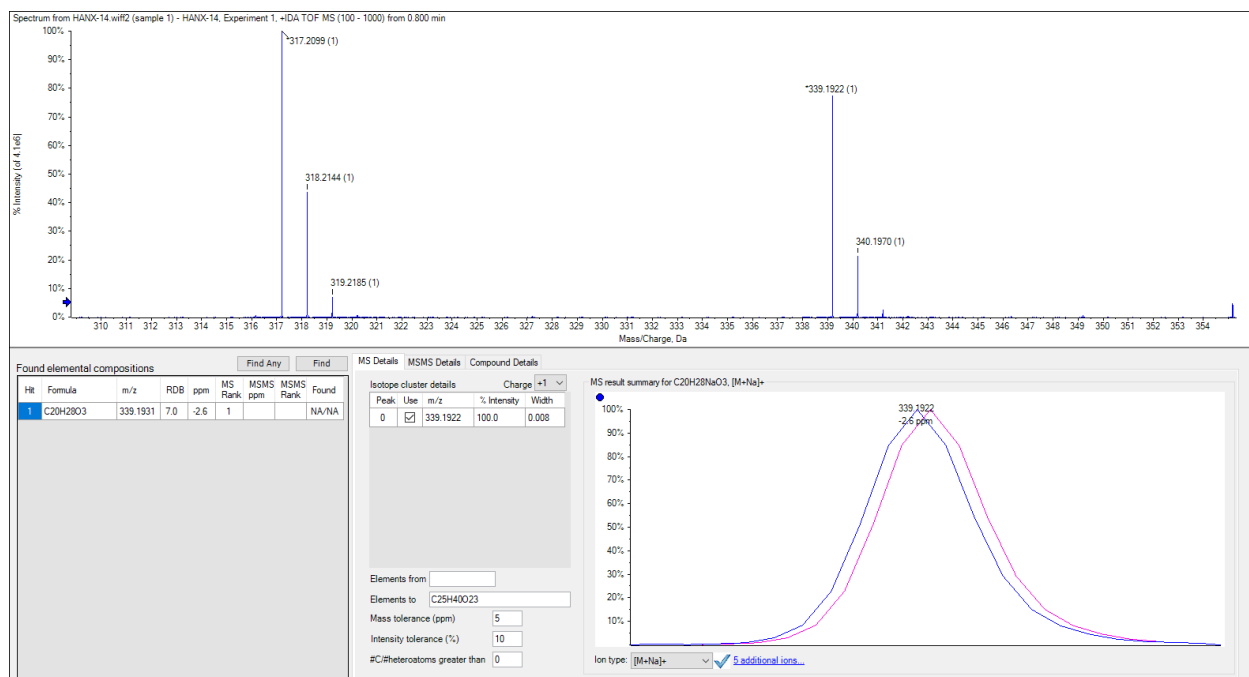

**Figure S17.** HRESIMS of **1**.

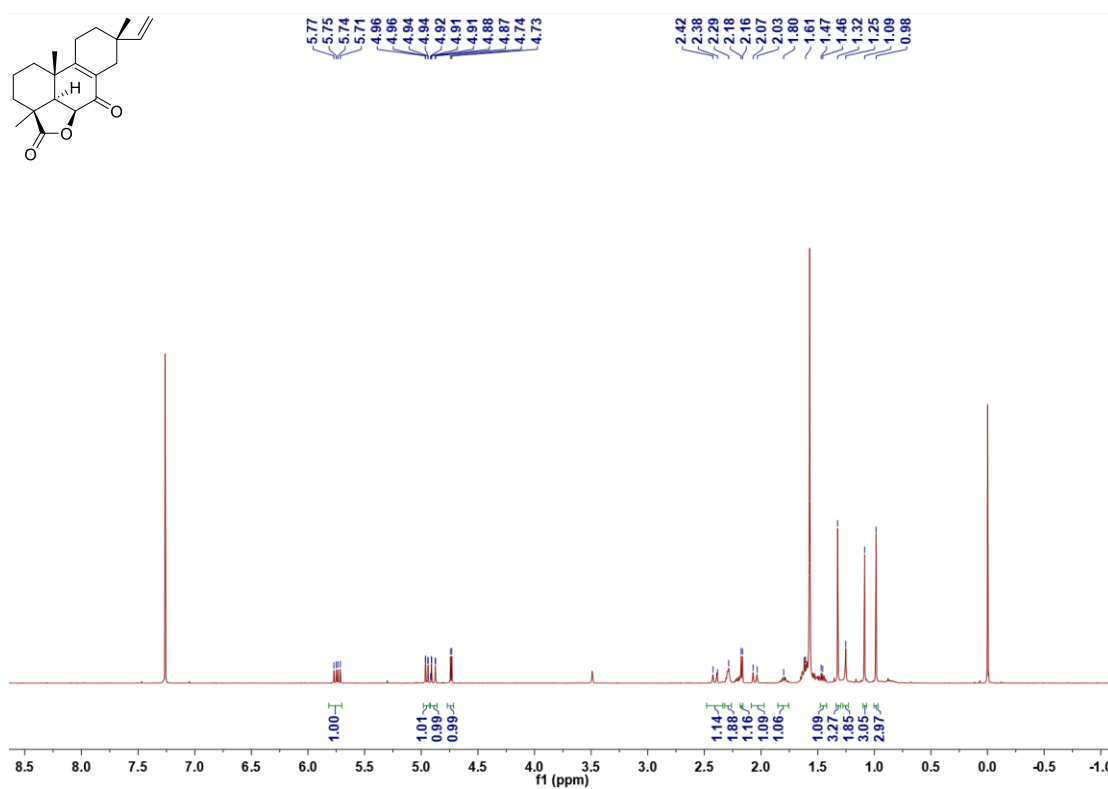

**Figure S18.** <sup>1</sup>H NMR (600 MHz) spectrum of **2** in CDCl<sub>3</sub>.

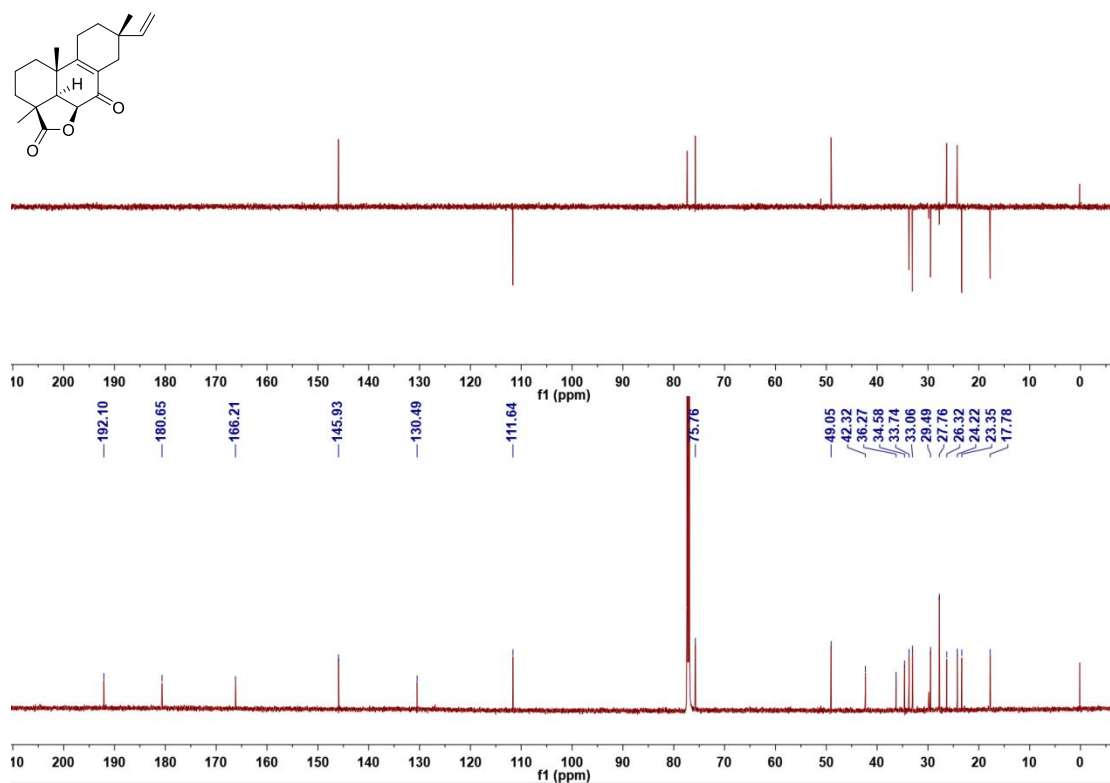

**Figure S19.** <sup>13</sup>C NMR and DEPT (150 MHz) spectra of **2** in CDCl<sub>3</sub>.

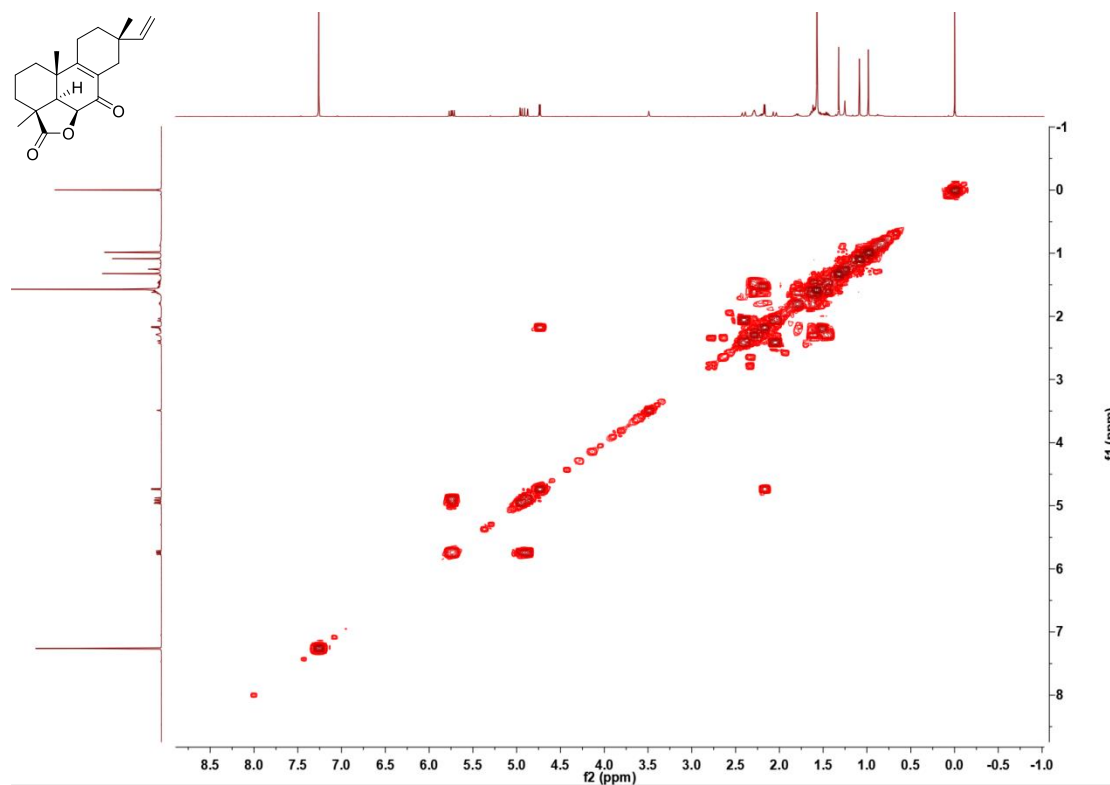

**Figure S20.** <sup>1</sup>H-<sup>1</sup>H COSY (600 MHz) spectrum of **2** in CDCl<sub>3</sub>.

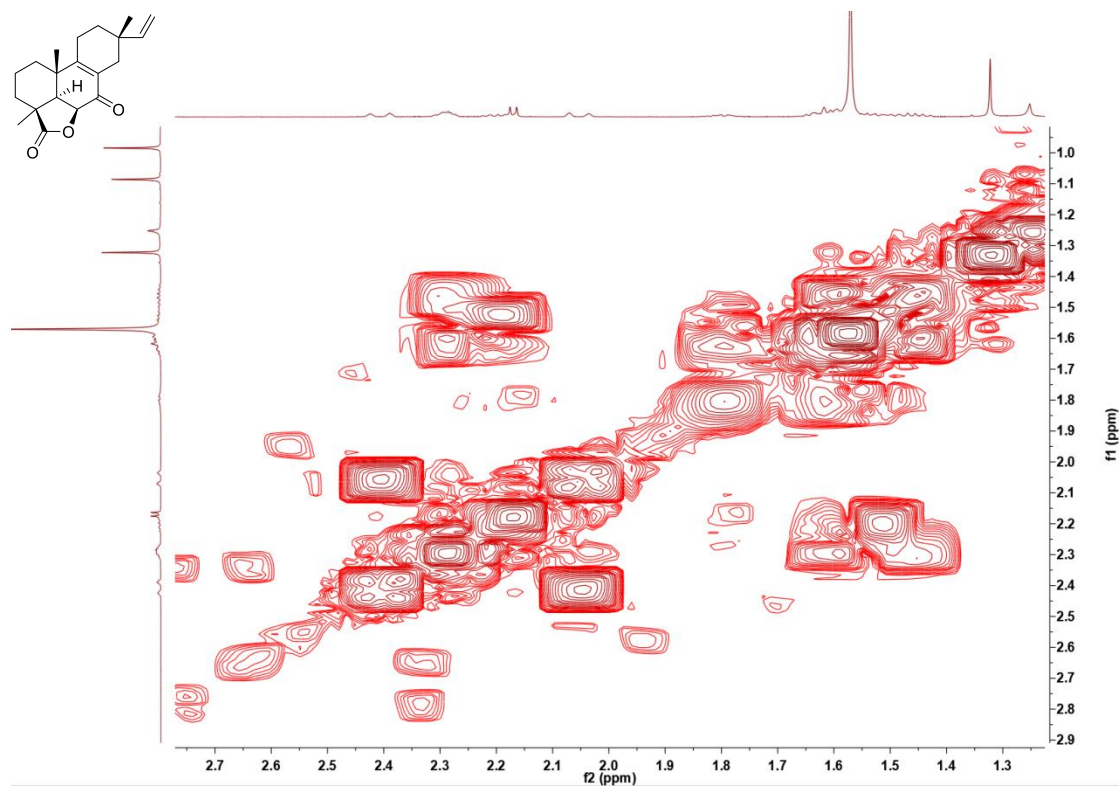

**Figure S21.** Enlarged  $^1\text{H}$ - $^1\text{H}$  COSY (600 MHz) spectrum of **2** in  $\text{CDCl}_3$ .

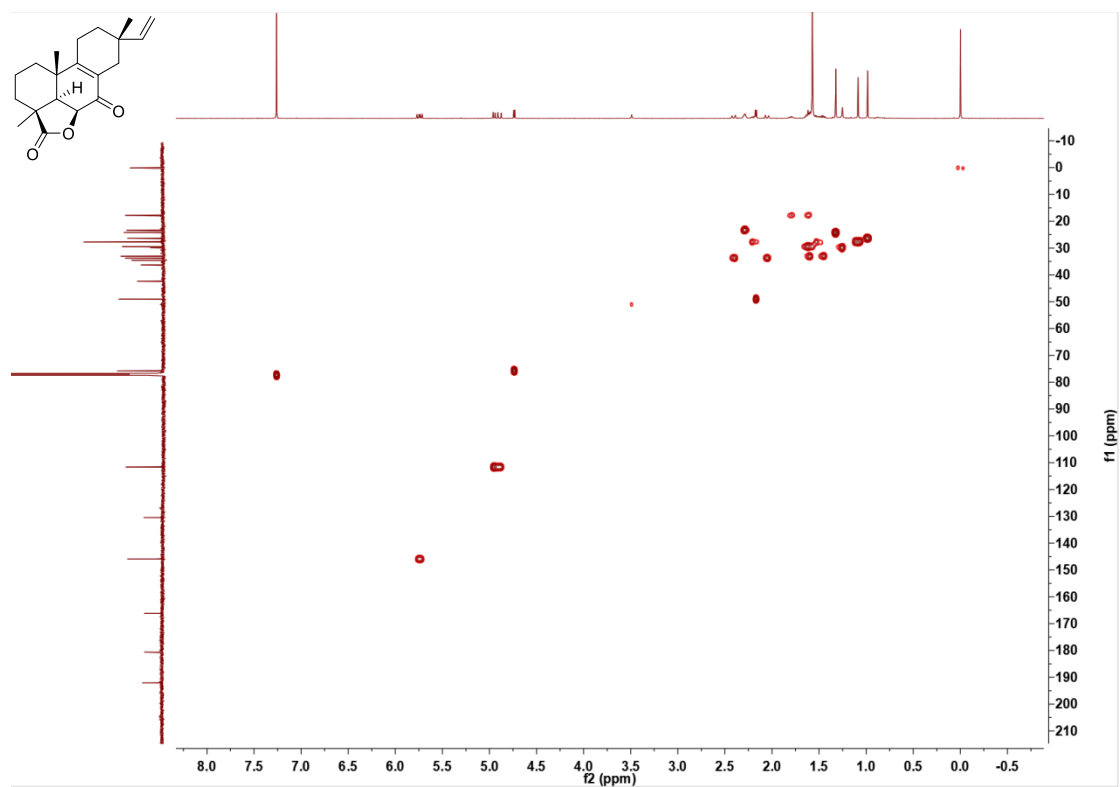

**Figure S22.** HSQC (600 MHz) spectrum of **2** in  $\text{CDCl}_3$ .

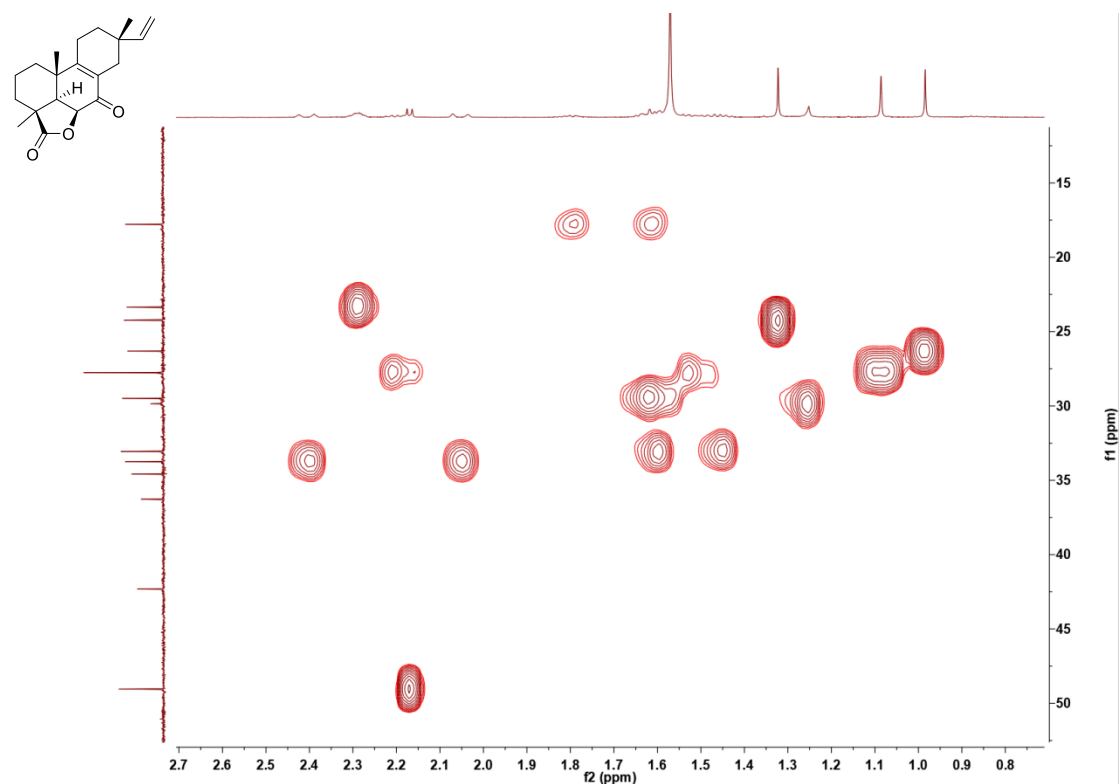

**Figure S23.** Enlarged HSQC (600 MHz) spectrum of **2** in  $\text{CDCl}_3$ .

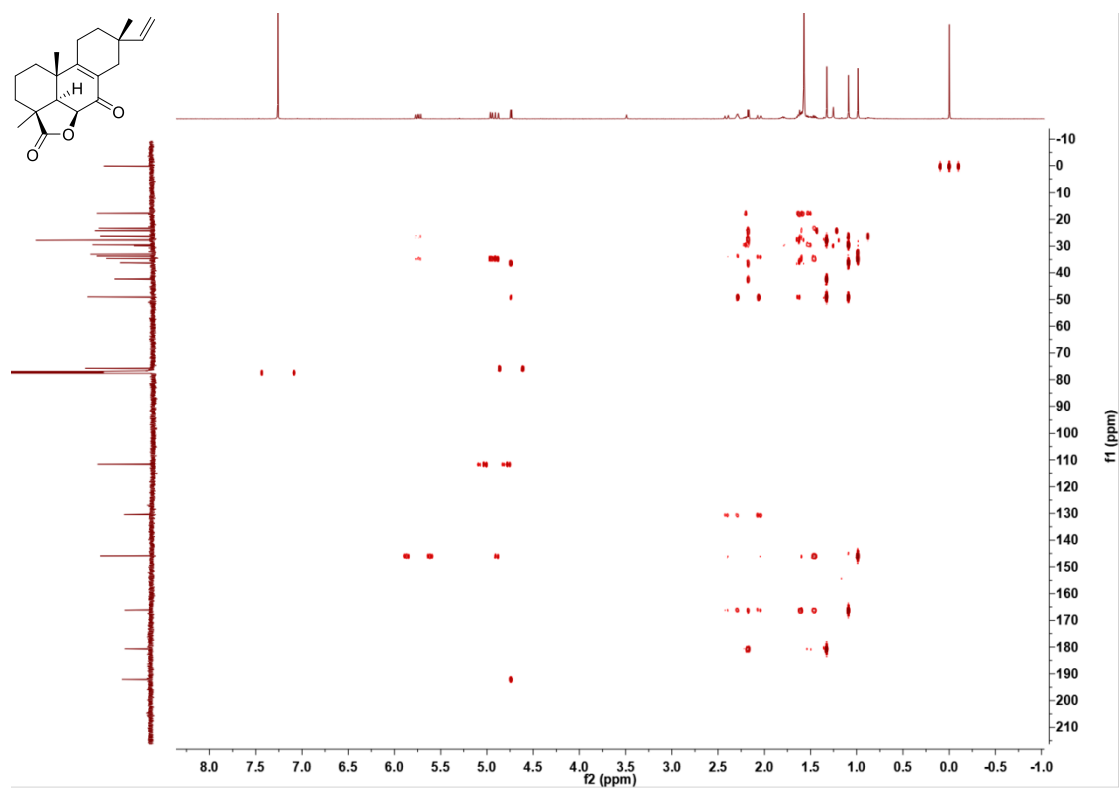

**Figure S24.** HMBC (600 MHz) spectrum of **2** in  $\text{CDCl}_3$ .

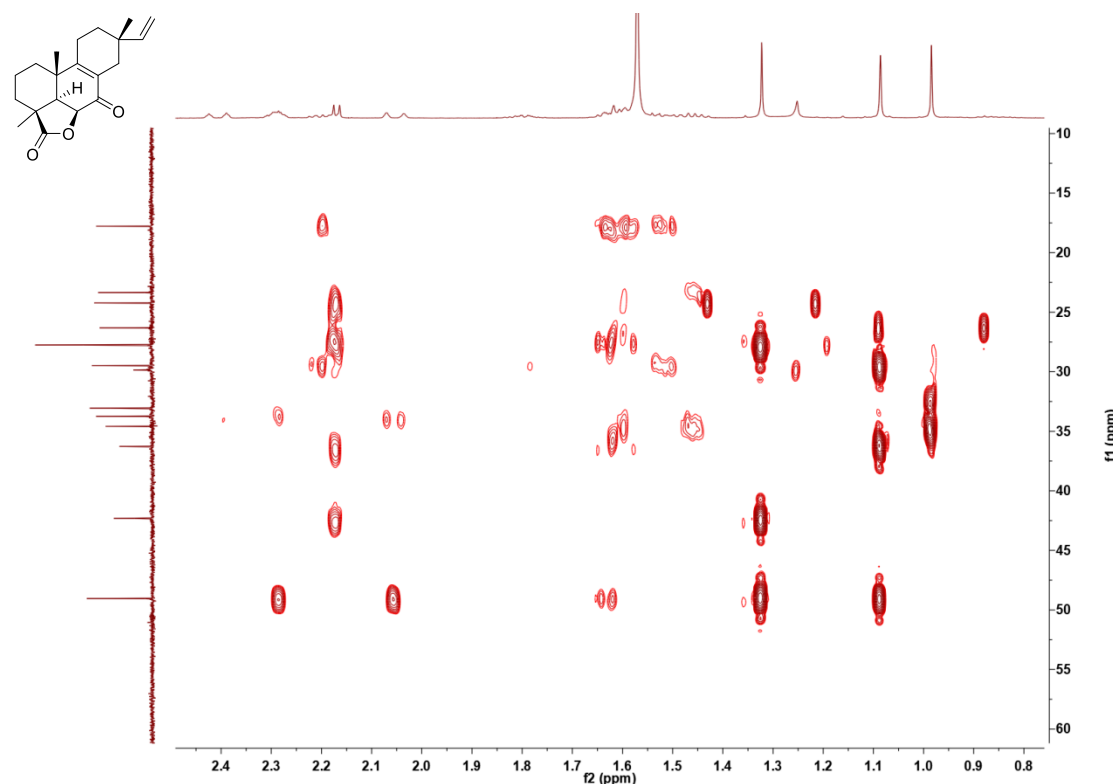

**Figure S25.** Enlarged HMBC (600 MHz) spectrum of **2** in  $\text{CDCl}_3$ .

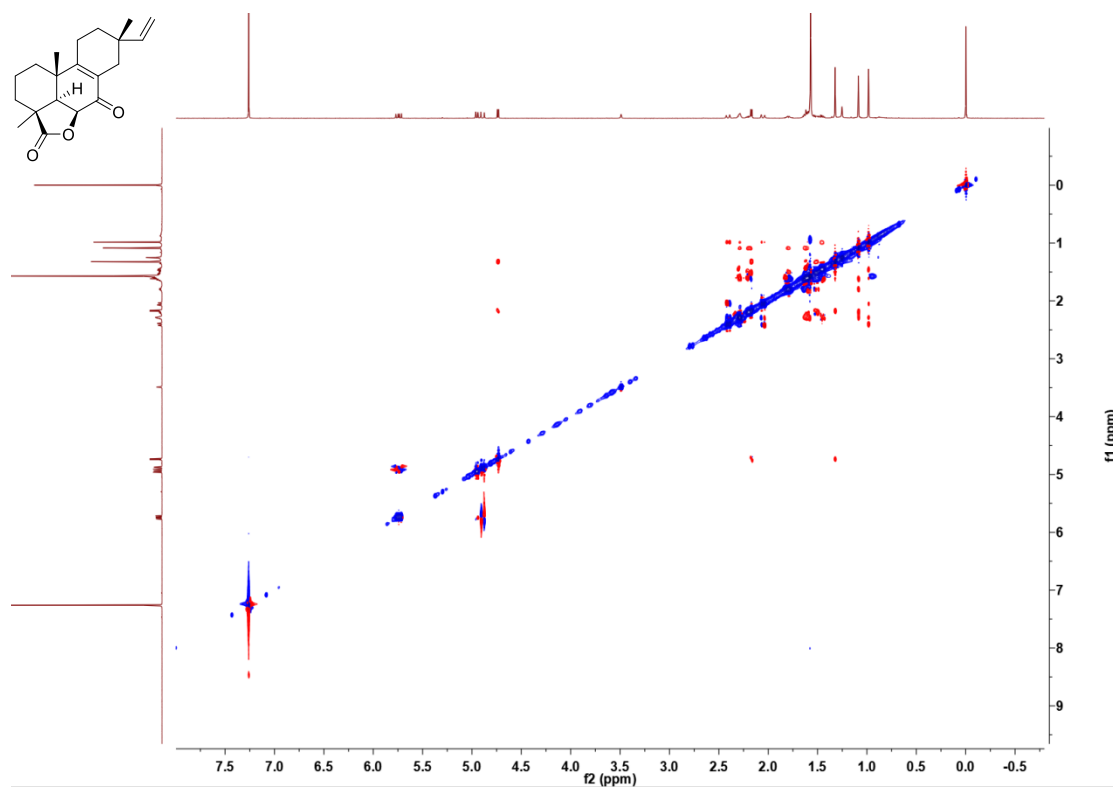

**Figure S26.** ROESY (600 MHz) spectrum of **2** in  $\text{CDCl}_3$ .

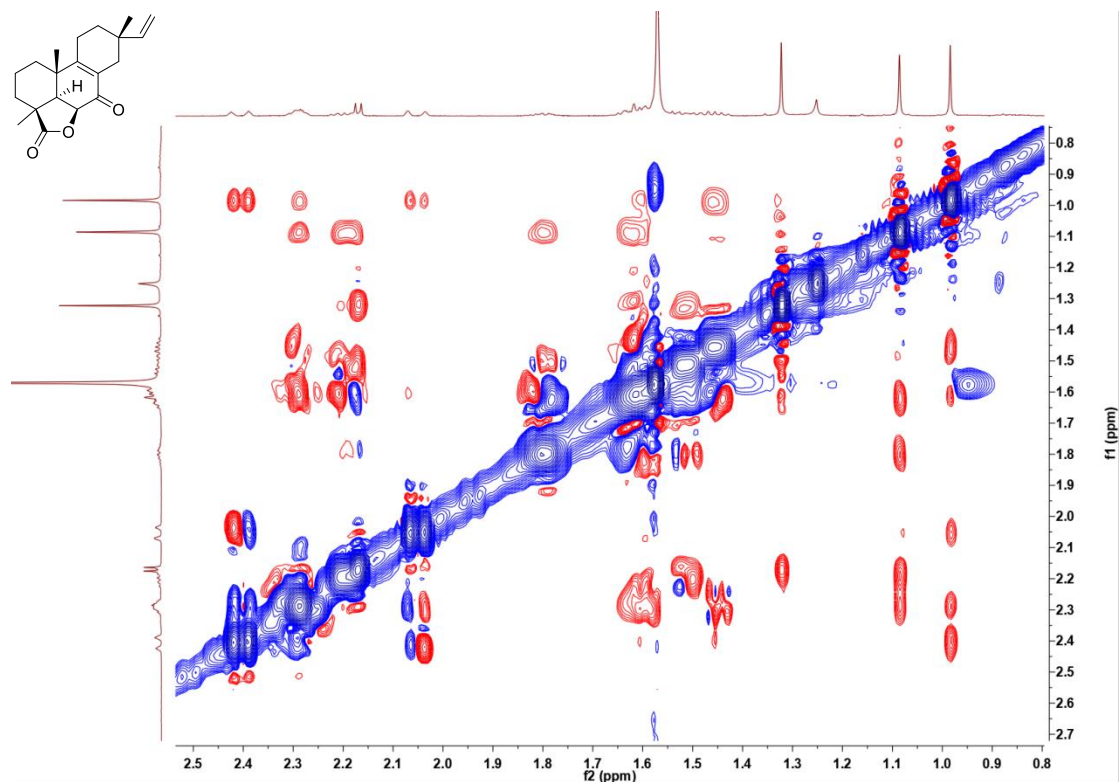

**Figure S27.** Enlarged ROESY (600 MHz) spectrum of **2** in  $\text{CDCl}_3$ .

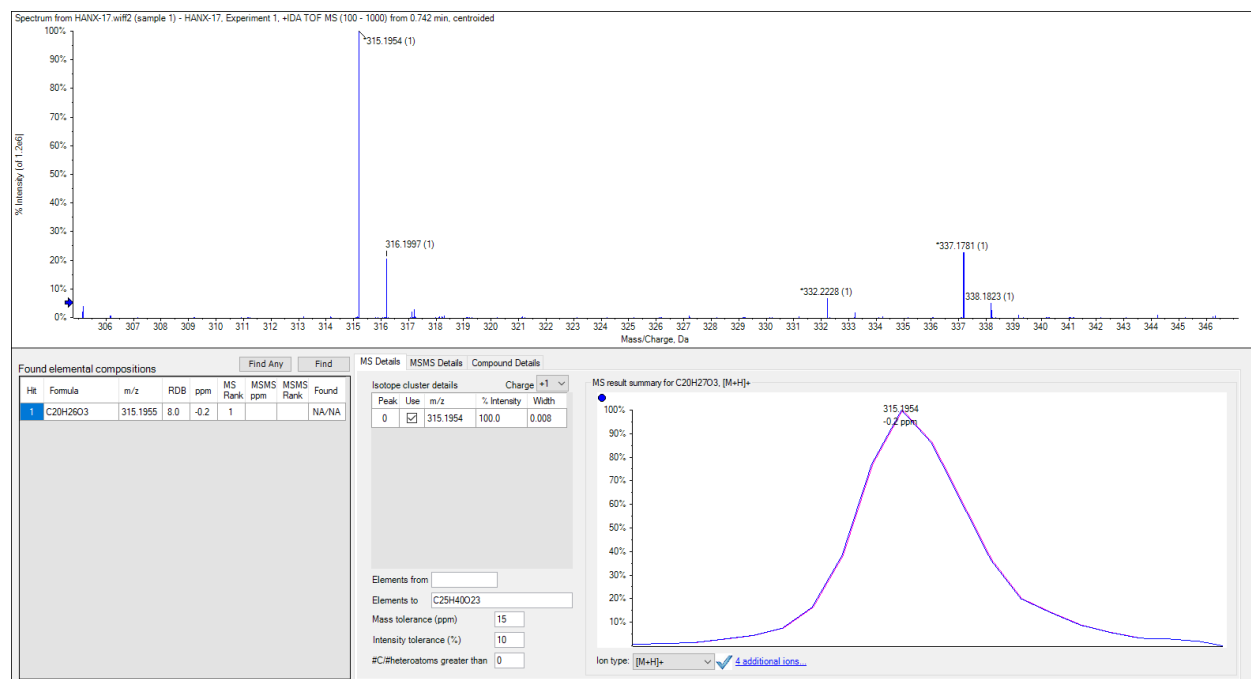

**Figure S28.** HRESIMS of **2**.



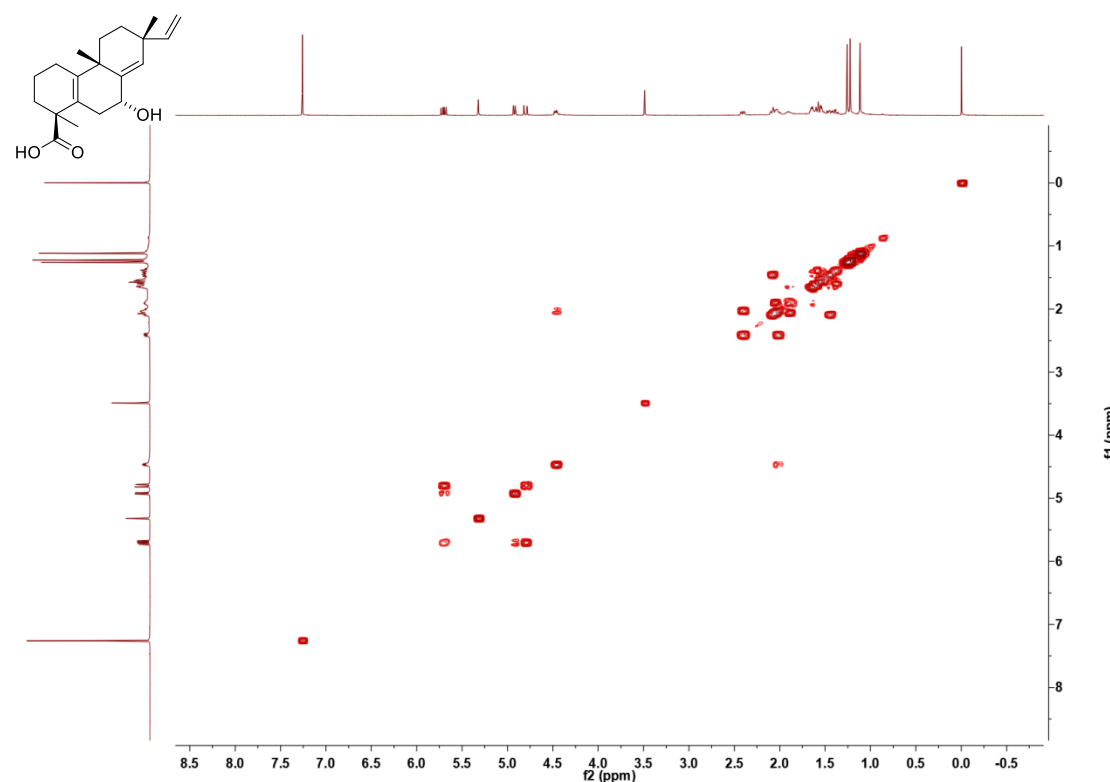

**Figure S31.**  $^1\text{H}$ - $^1\text{H}$  COSY (600 MHz) spectrum of **3** in  $\text{CDCl}_3$ .

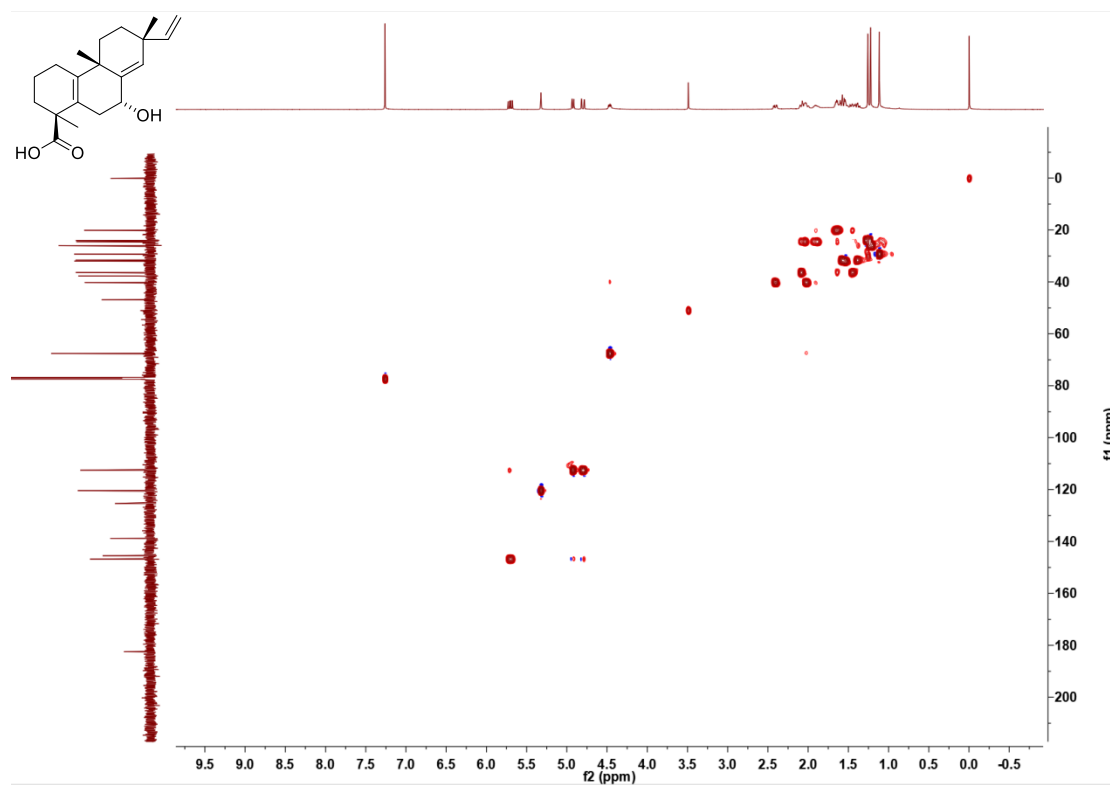

**Figure S32.** HSQC (600 MHz) spectrum of **3** in  $\text{CDCl}_3$ .



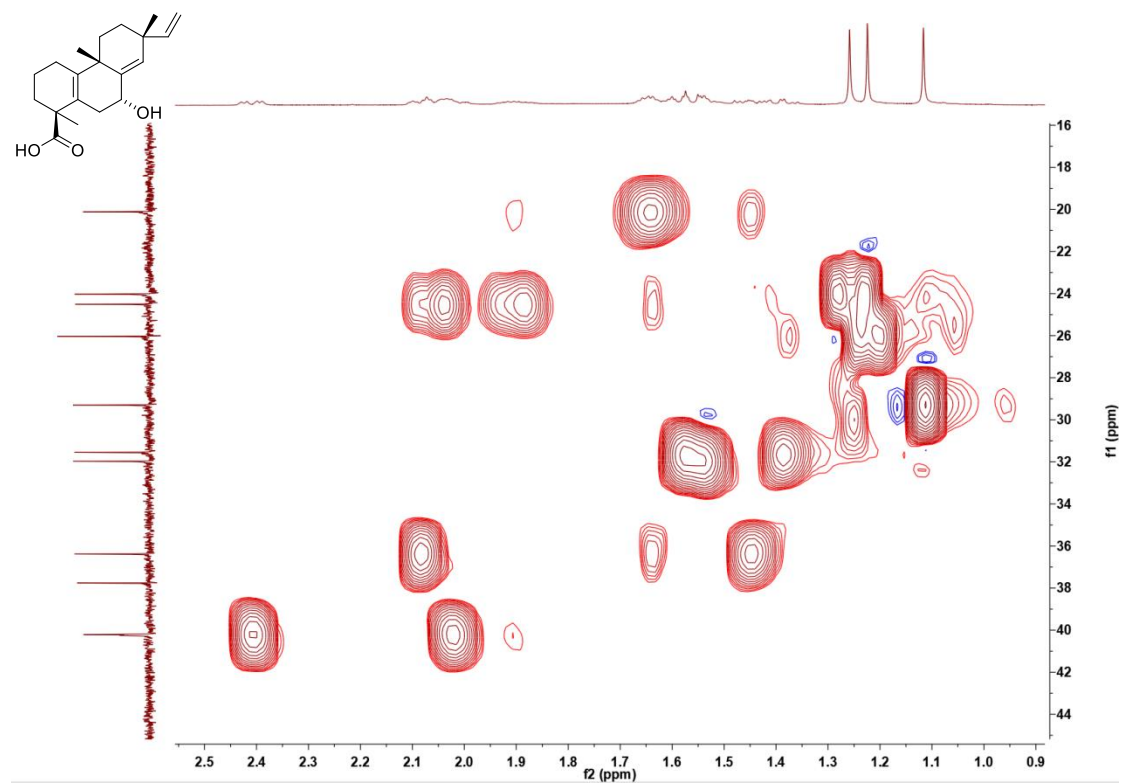

**Figure S33.** Enlarged HSQC (600 MHz) spectrum of **3** in CDCl<sub>3</sub>.

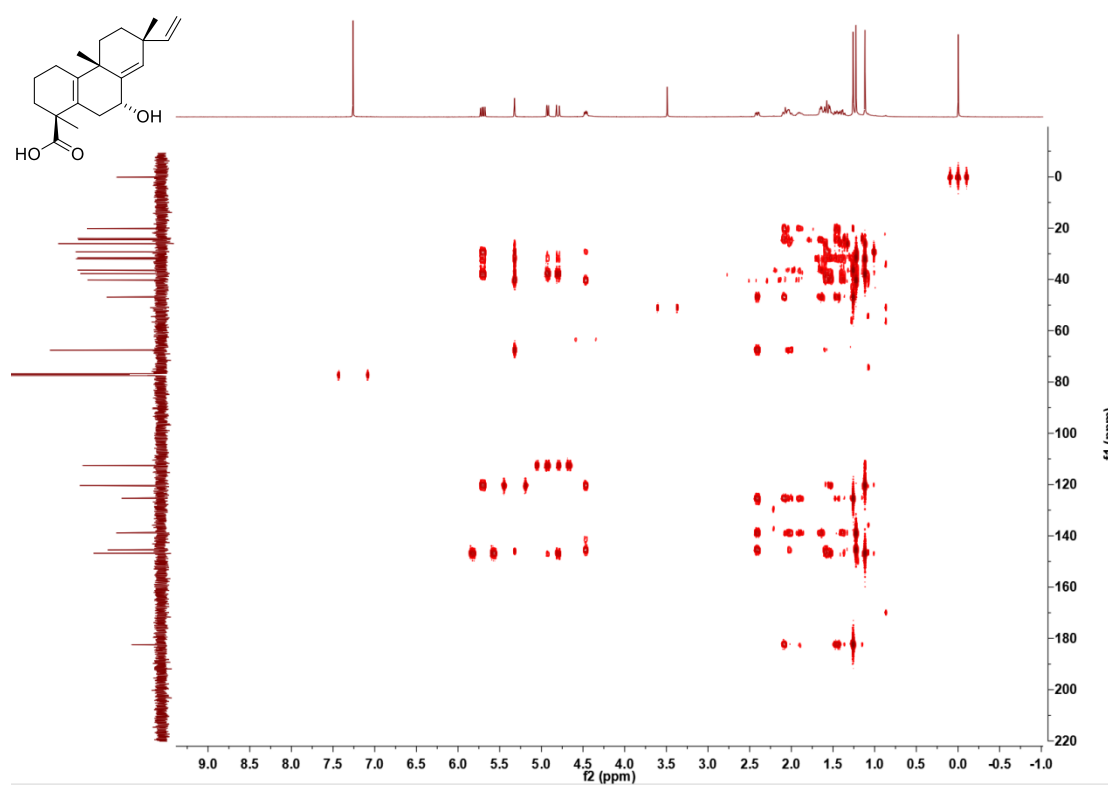

**Figure S34.** HMBC (600 MHz) spectrum of **3** in CDCl<sub>3</sub>.

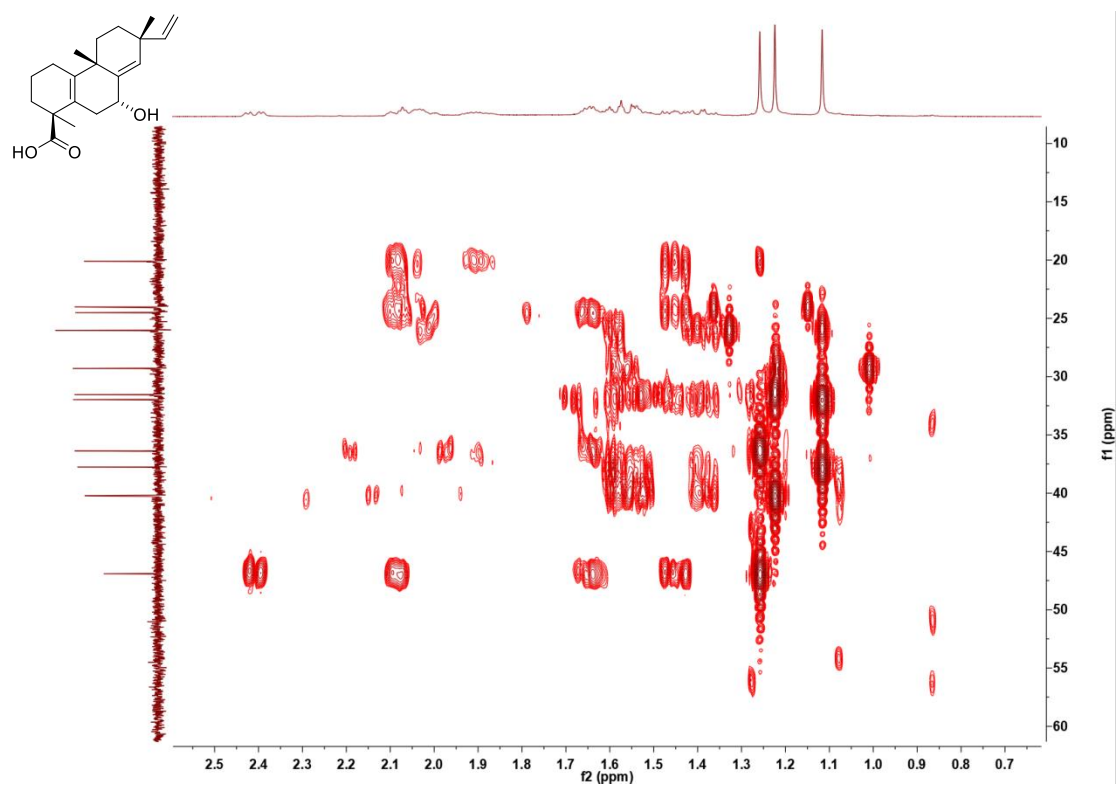

**Figure S35.** Enlarged HMBC (600 MHz) spectrum of **3** in  $\text{CDCl}_3$ .

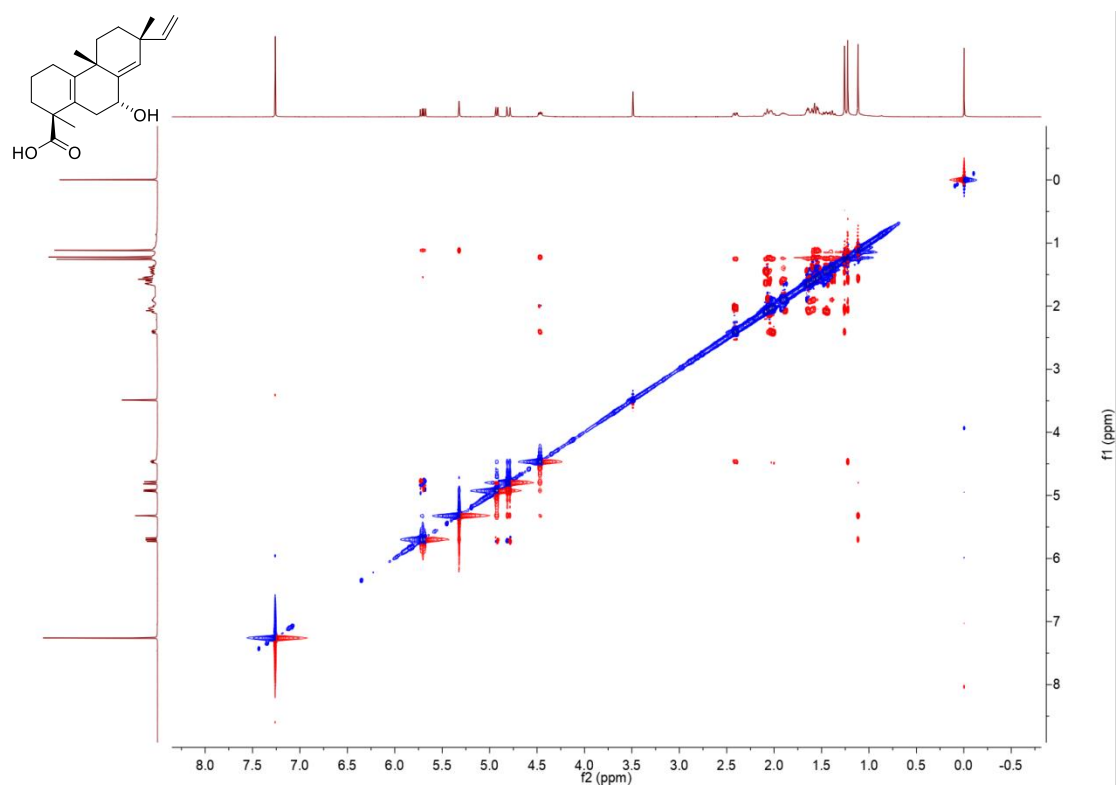

**Figure S36.** ROESY (600 MHz) spectrum of **3** in  $\text{CDCl}_3$ .

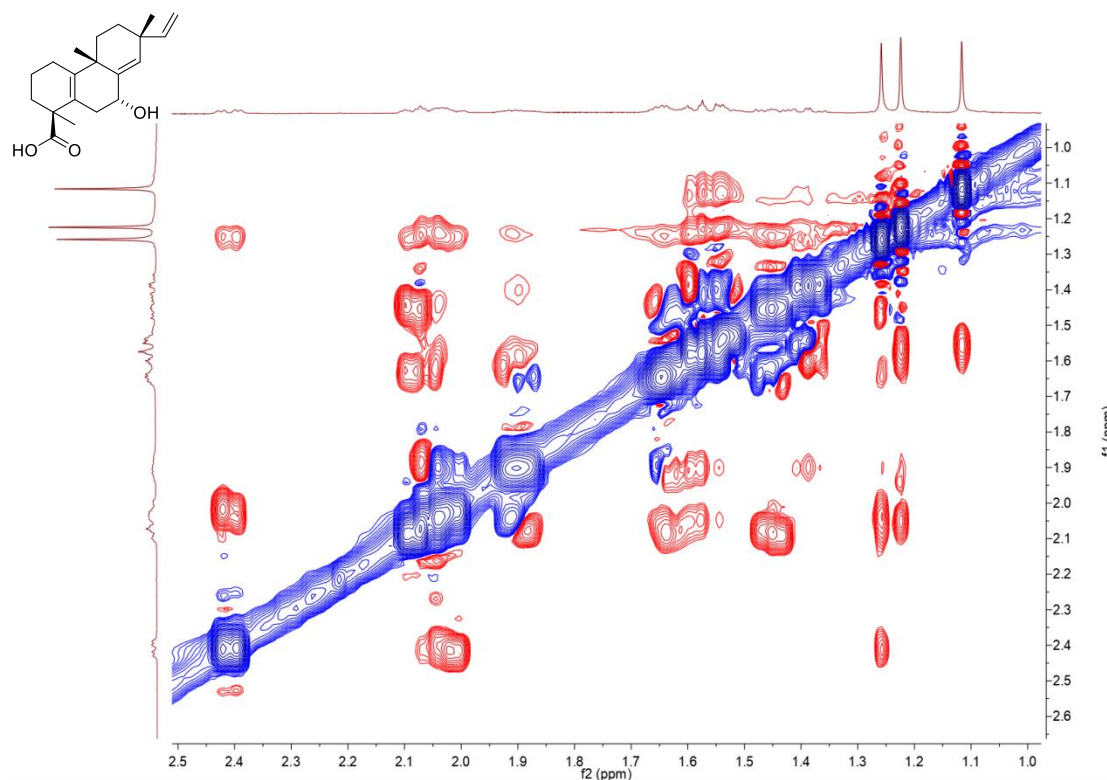

**Figure S37.** Enlarged ROESY (600 MHz) spectrum of **3** in  $\text{CDCl}_3$ .

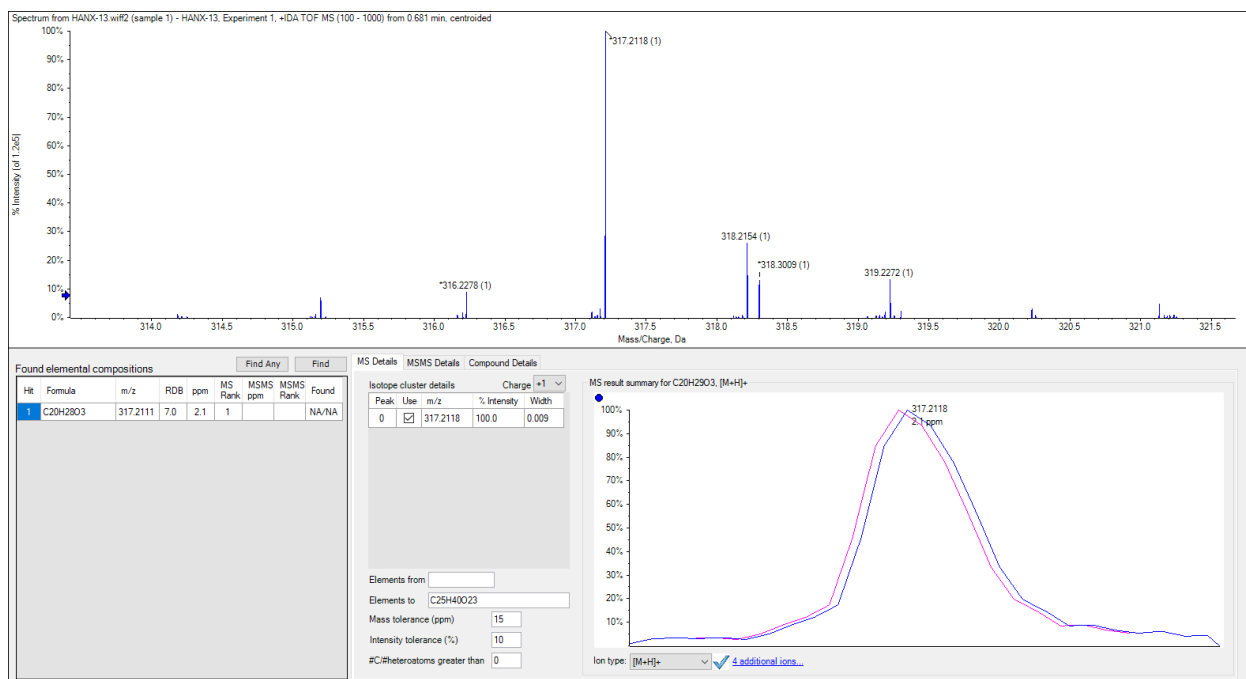

**Figure S38.** HRESIMS of **3**.

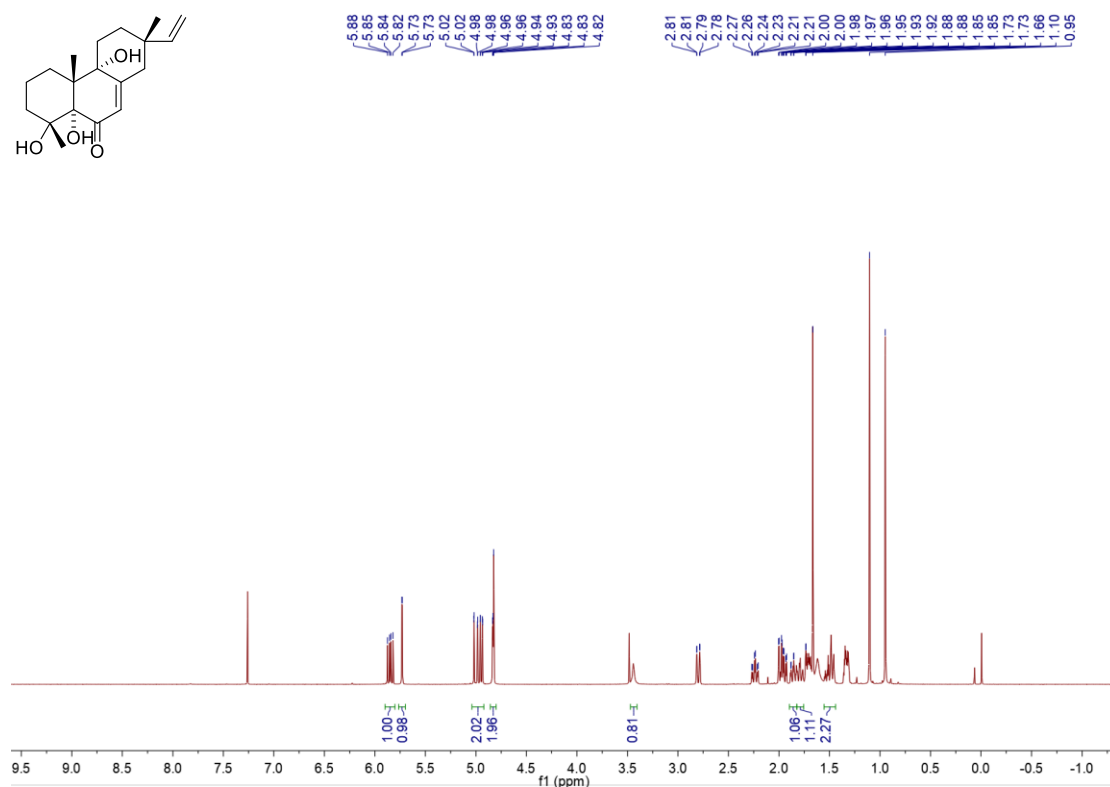

**Figure S39.** <sup>1</sup>H NMR (600 MHz) spectrum of **4** in CDCl<sub>3</sub>.

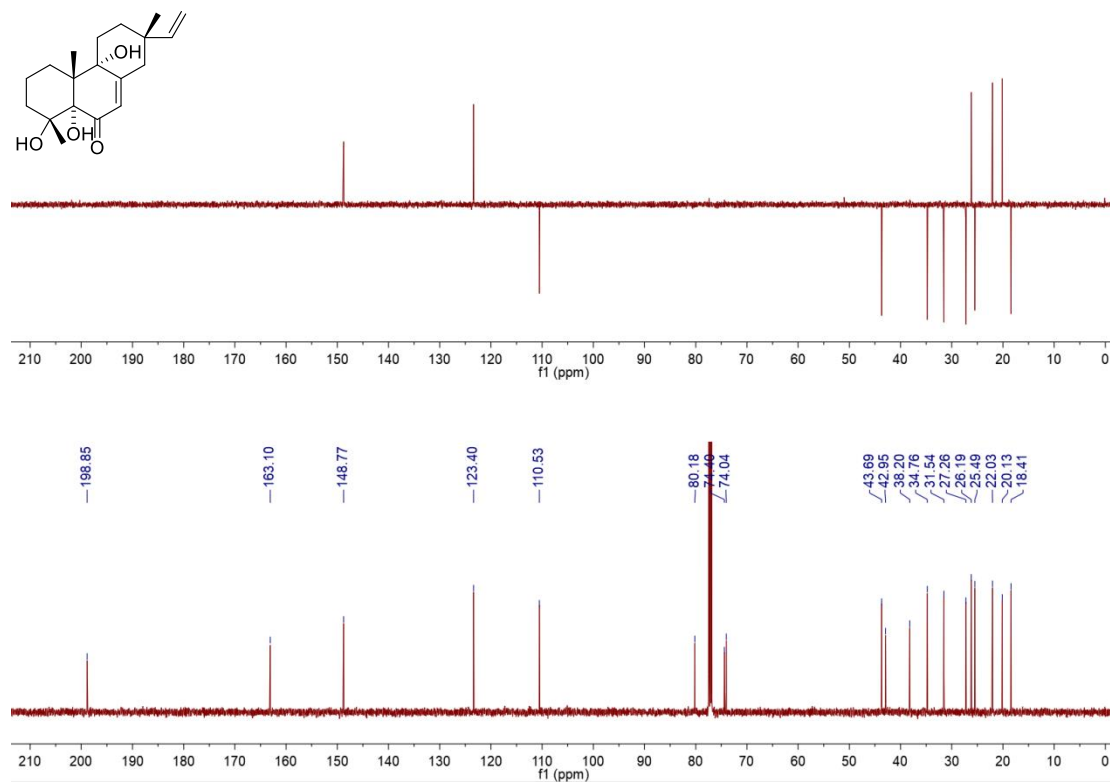

**Figure S40.** <sup>13</sup>C NMR and DEPT (150 MHz) spectra of **4** in CDCl<sub>3</sub>.

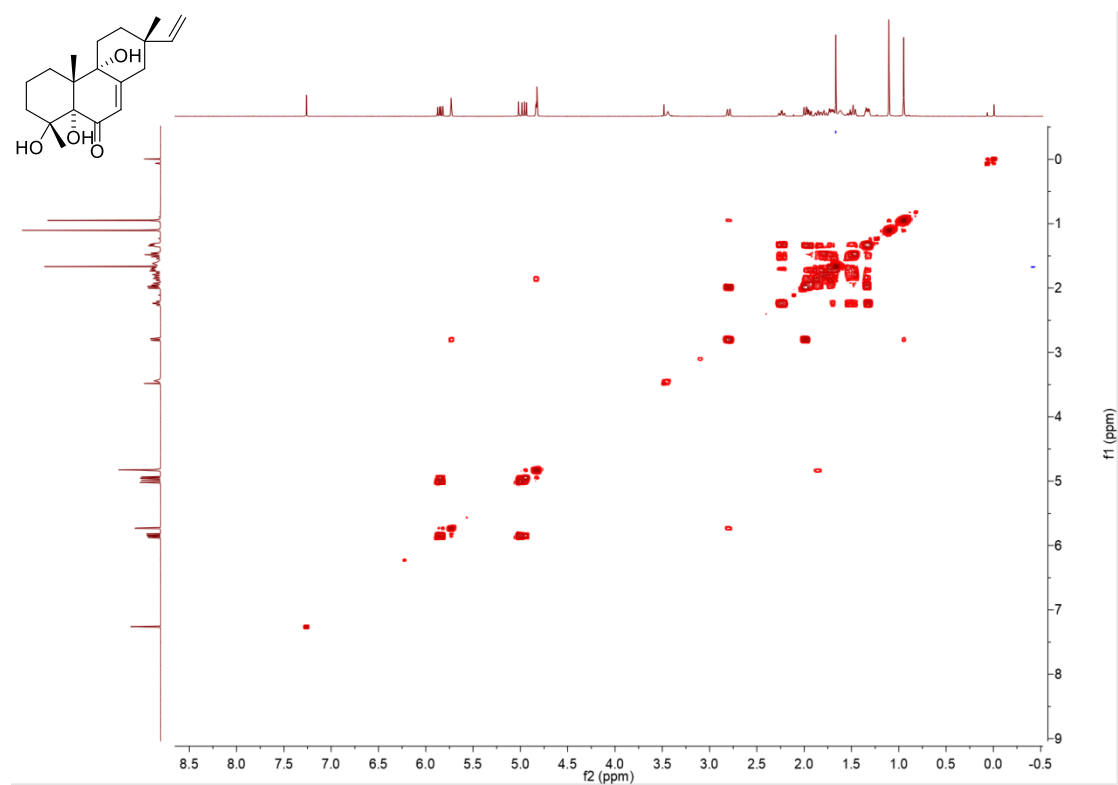

**Figure S41.**  $^1\text{H}$ - $^1\text{H}$  COSY (600 MHz) spectrum of **4** in  $\text{CDCl}_3$ .

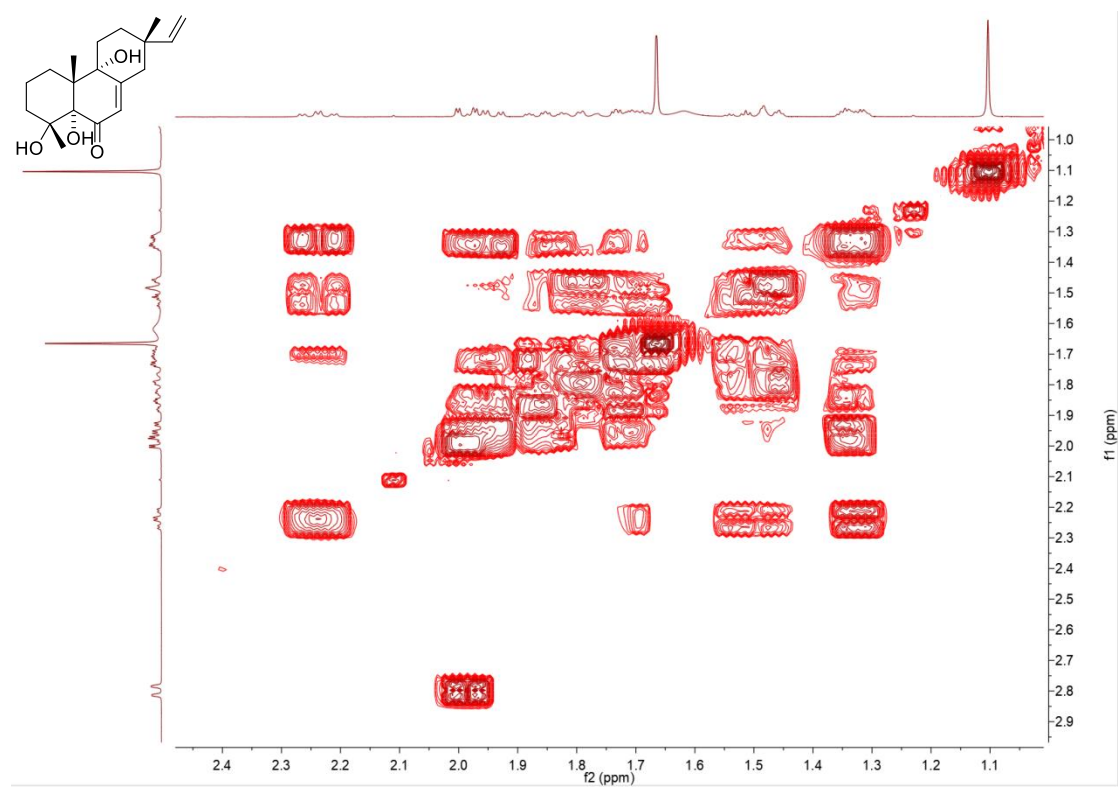

**Figure S42.** Enlarged  $^1\text{H}$ - $^1\text{H}$  COSY (600 MHz) spectrum of **4** in  $\text{CDCl}_3$ .

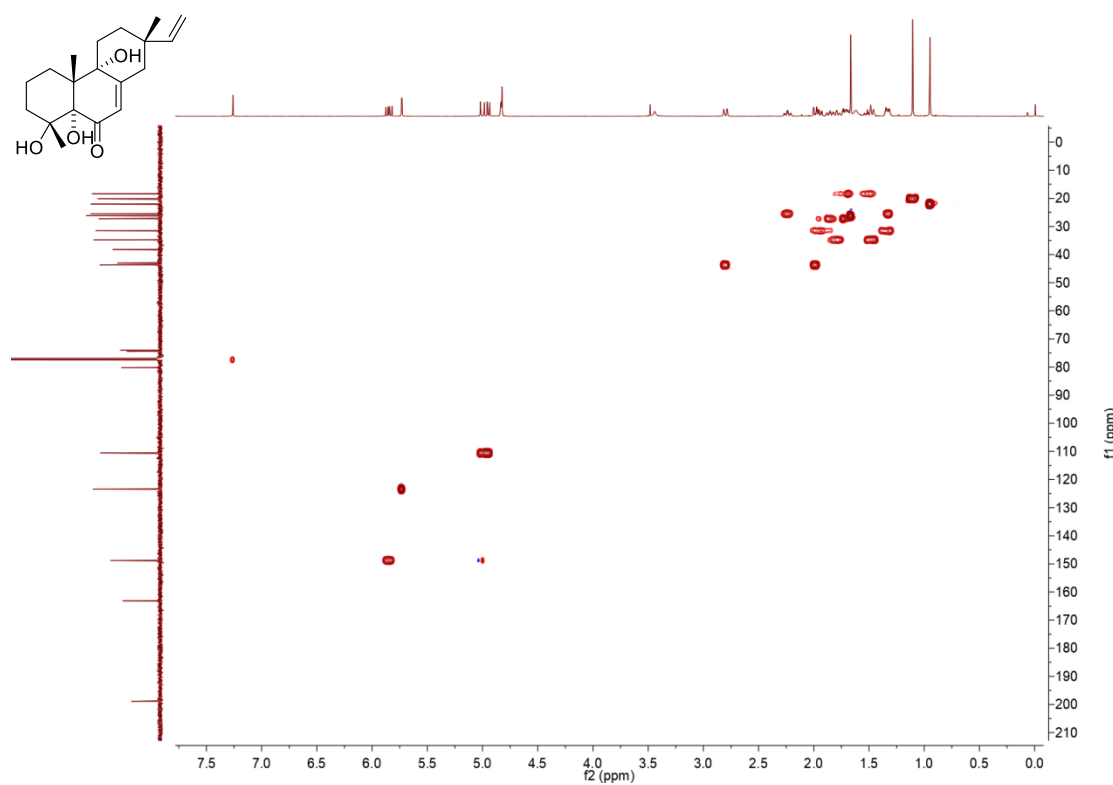

**Figure S43.** HSQC (600 MHz) spectrum of **4** in  $\text{CDCl}_3$ .

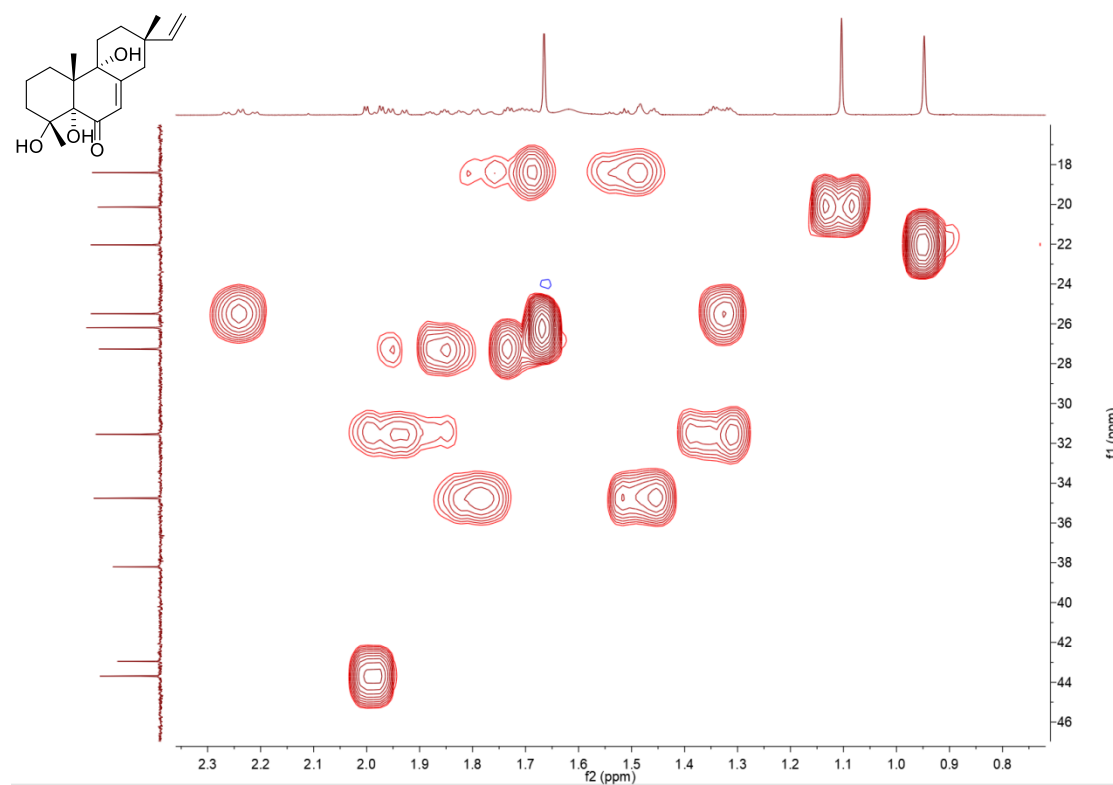

**Figure S44.** Enlarged HSQC (600 MHz) spectrum of **4** in  $\text{CDCl}_3$ .

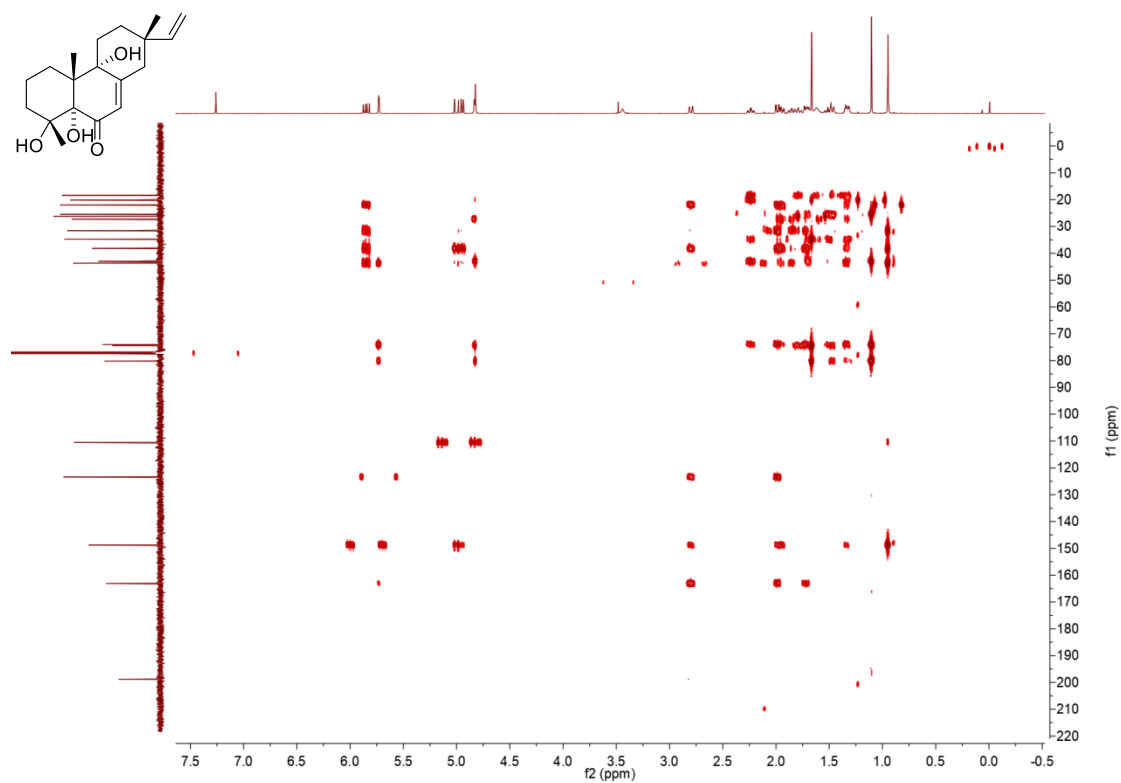

**Figure S45.** HMBC (600 MHz) spectrum of **4** in CDCl<sub>3</sub>.

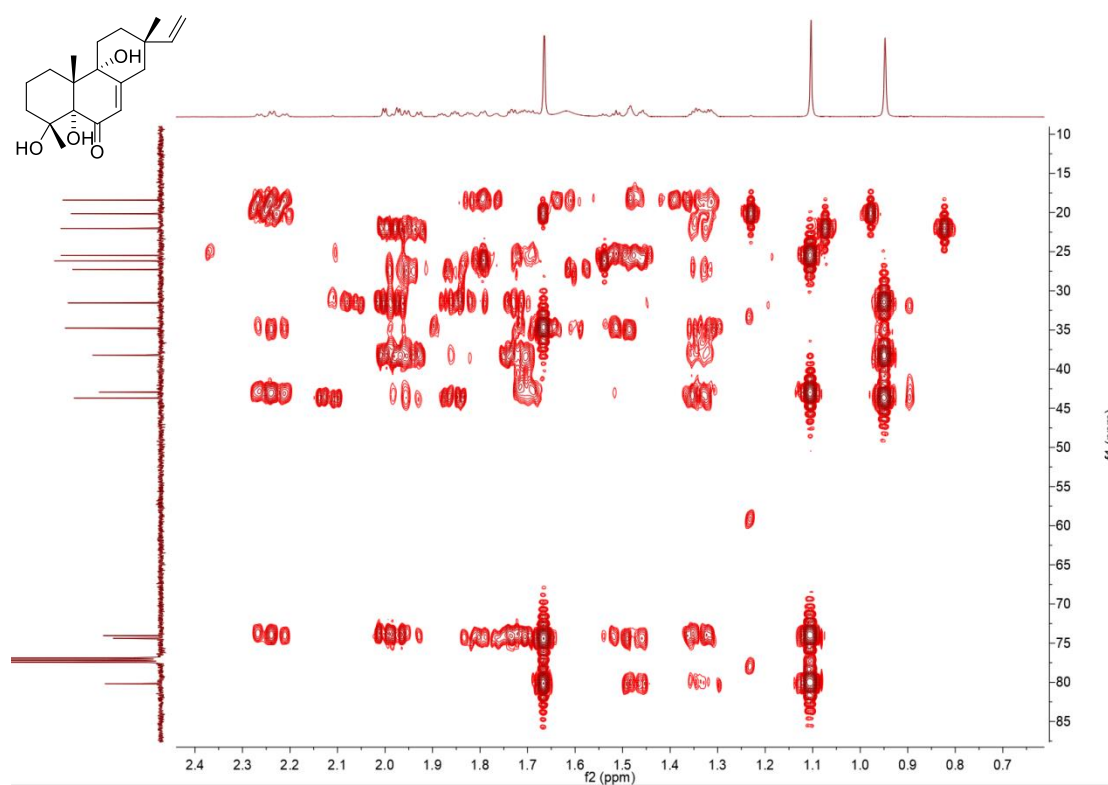

**Figure S46.** Enlarged HMBC (600 MHz) spectrum of **4** in CDCl<sub>3</sub>.

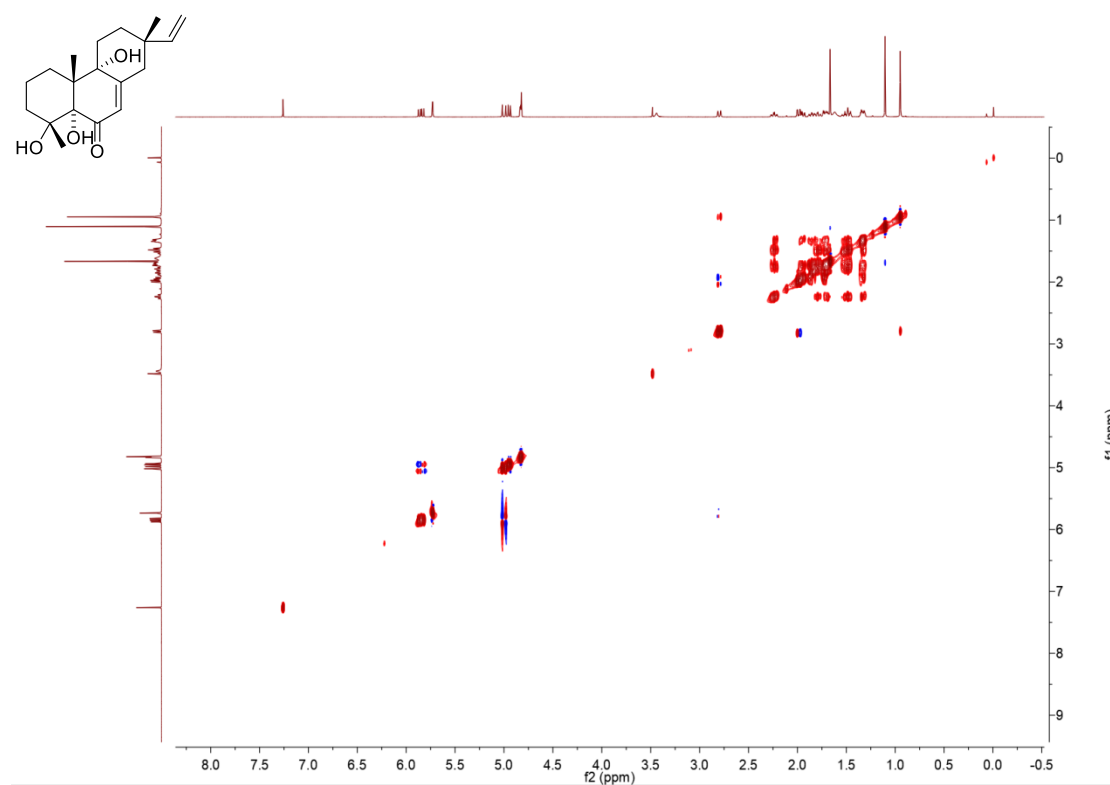

**Figure S47.** ROESY (600 MHz) spectrum of **4** in CDCl<sub>3</sub>.

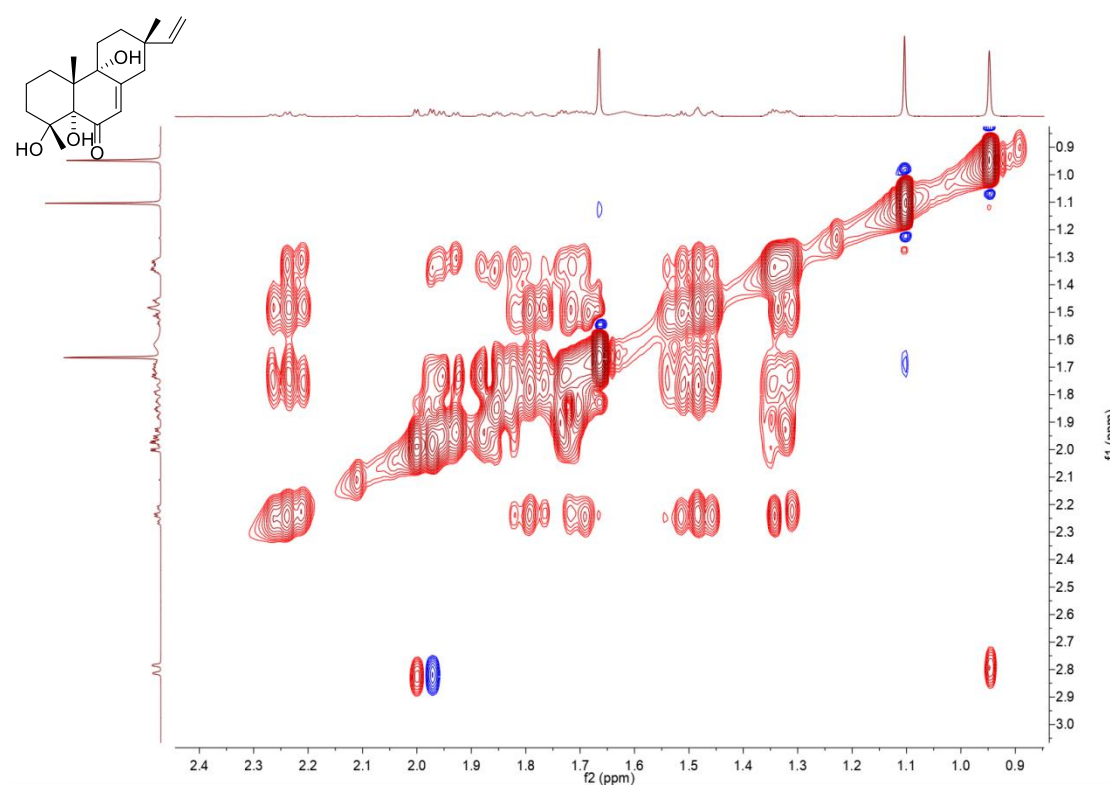

**Figure S48.** Enlarged ROESY (600 MHz) spectrum of **4** in CDCl<sub>3</sub>.



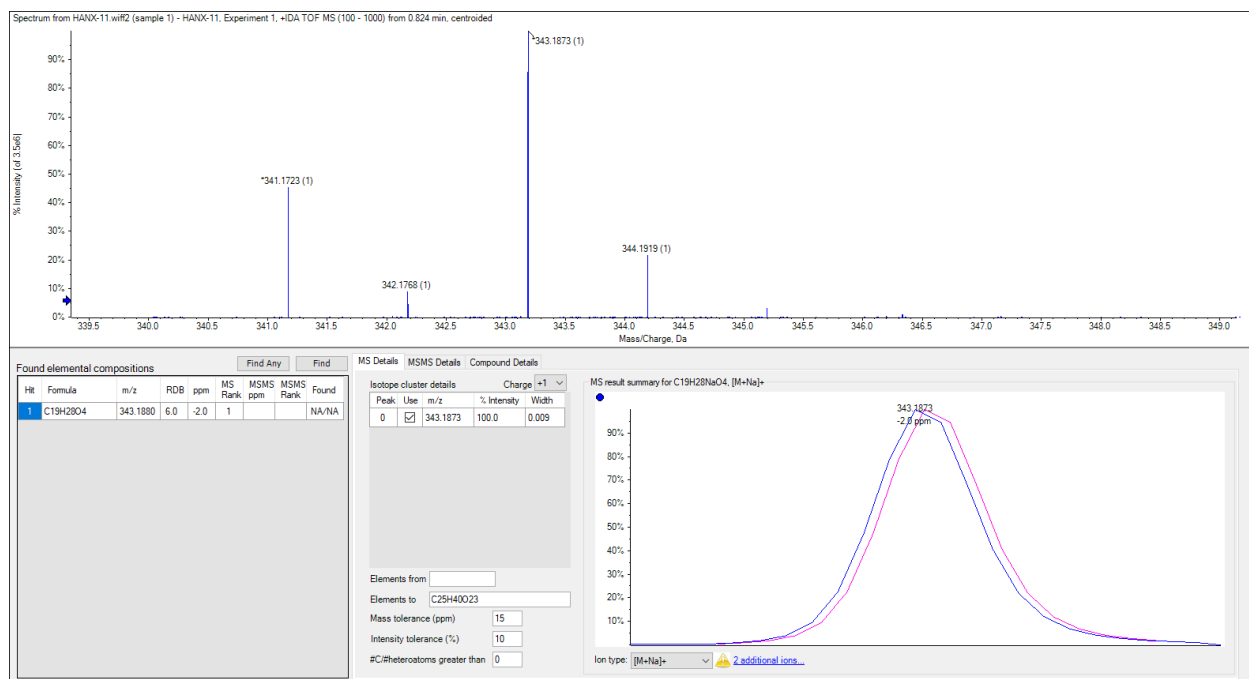

**Figure S49.** HRESIMS of **4**.

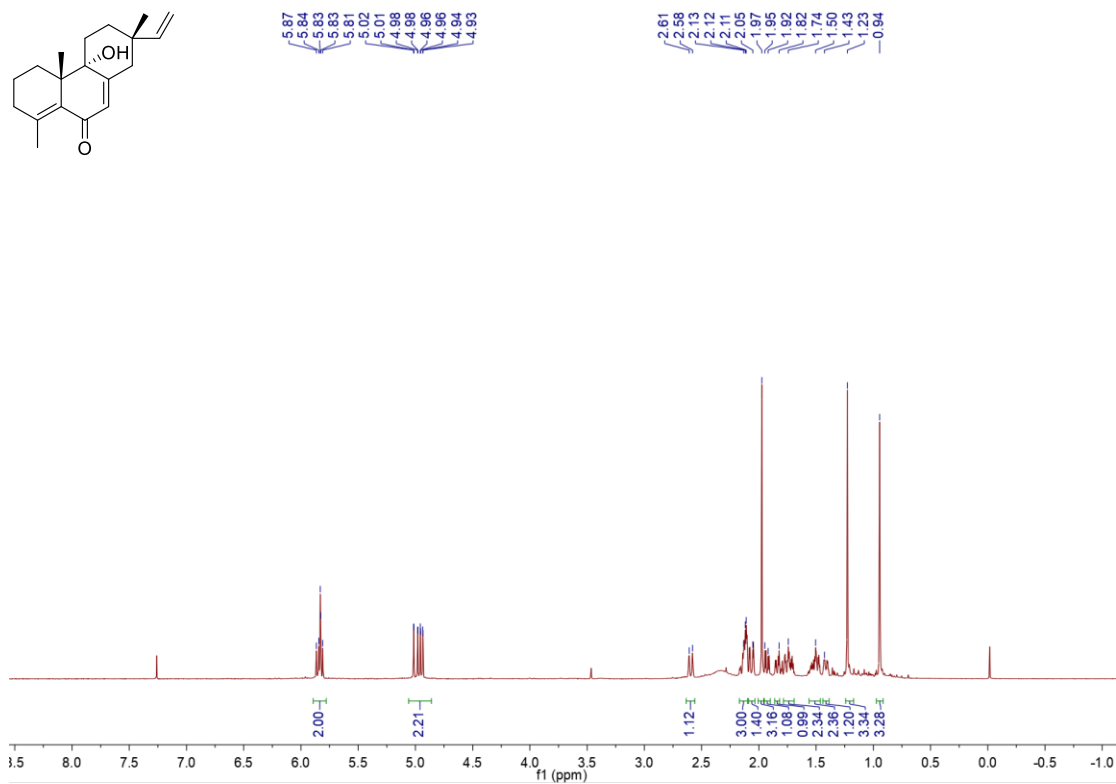

**Figure S50.** <sup>1</sup>H NMR (600 MHz) spectrum of **5** in CDCl<sub>3</sub>.

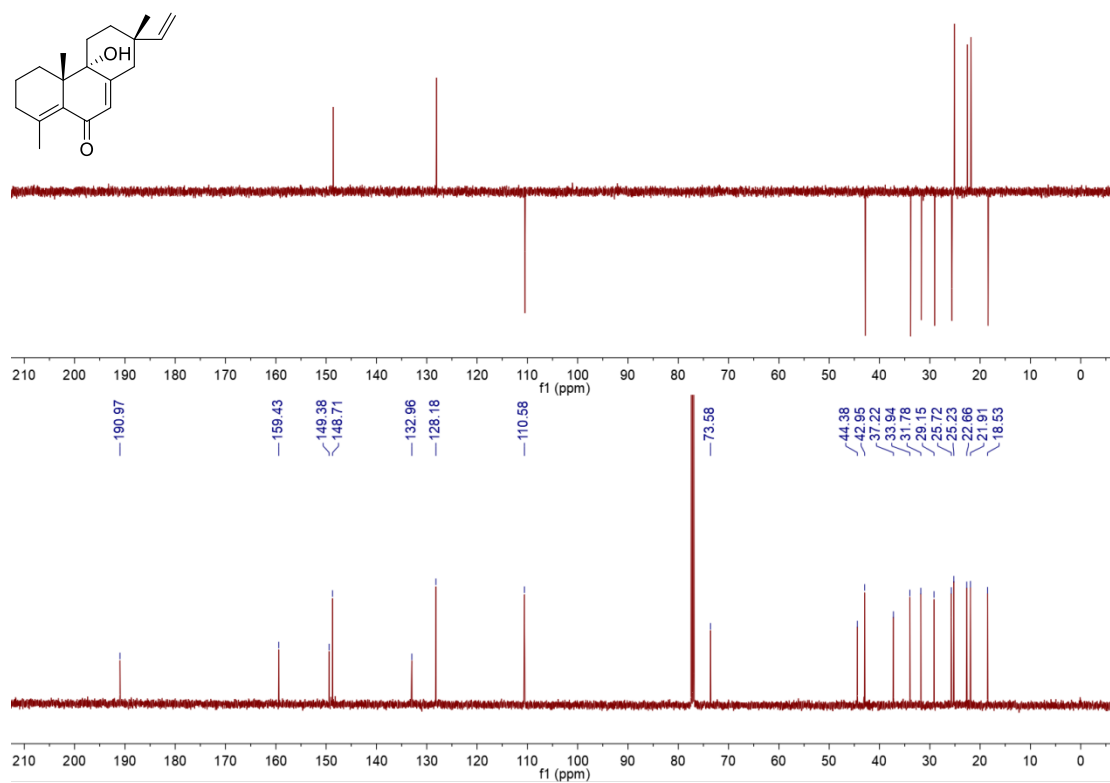

**Figure S51.**  $^{13}\text{C}$  NMR and DEPT (150 MHz) spectra of **5** in  $\text{CDCl}_3$ .

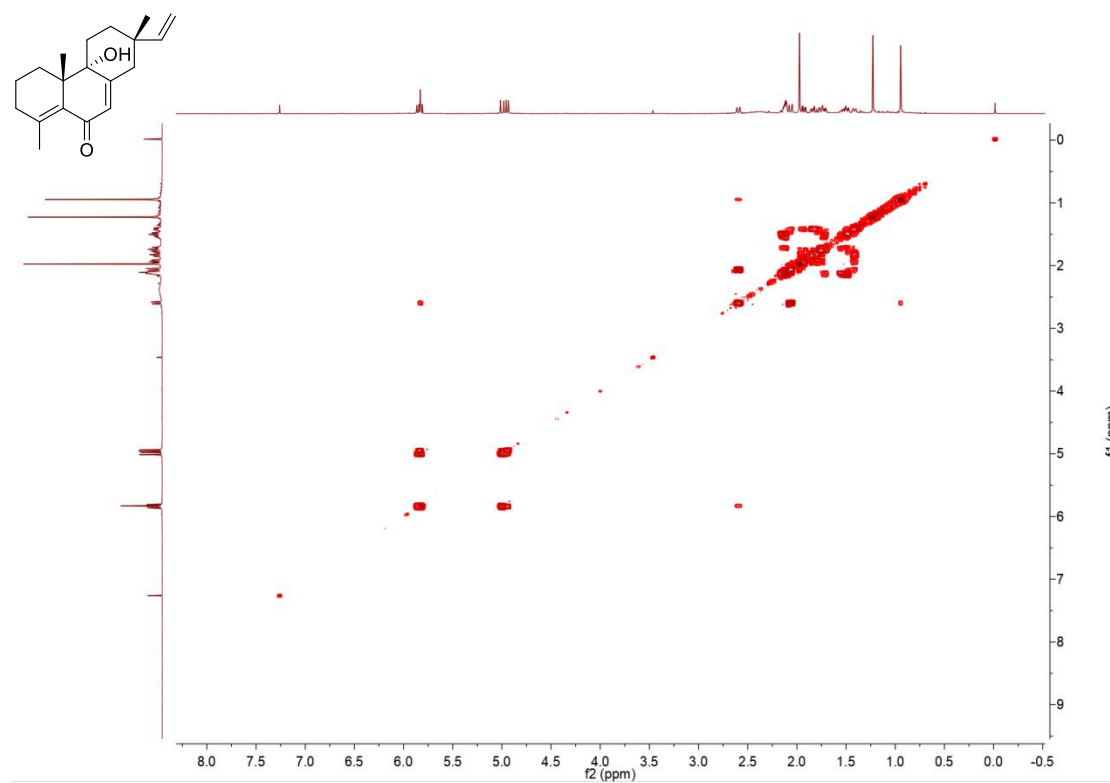

**Figure S52.**  $^1\text{H}$ - $^1\text{H}$  COSY (600 MHz) spectrum of **5** in  $\text{CDCl}_3$ .

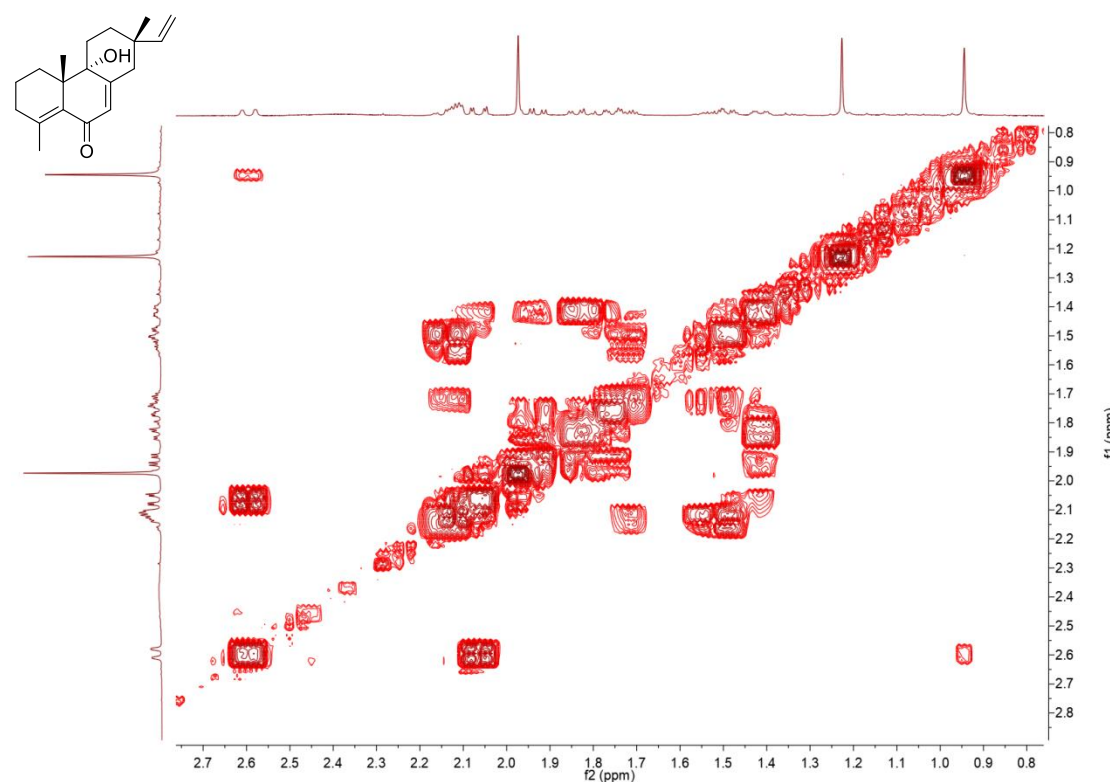

**Figure S53.** Enlarged  $^1\text{H}$ - $^1\text{H}$  COSY (600 MHz) spectrum of **5** in  $\text{CDCl}_3$ .

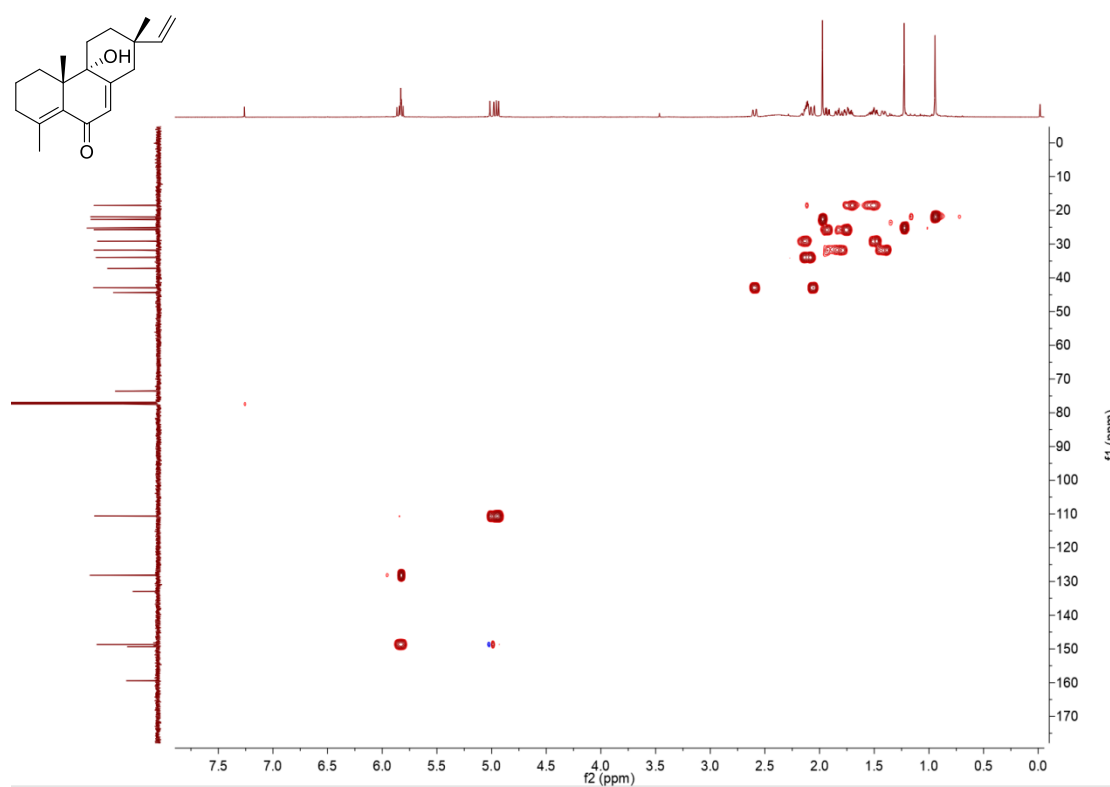

**Figure S54.** HSQC (600 MHz) spectrum of **5** in  $\text{CDCl}_3$ .

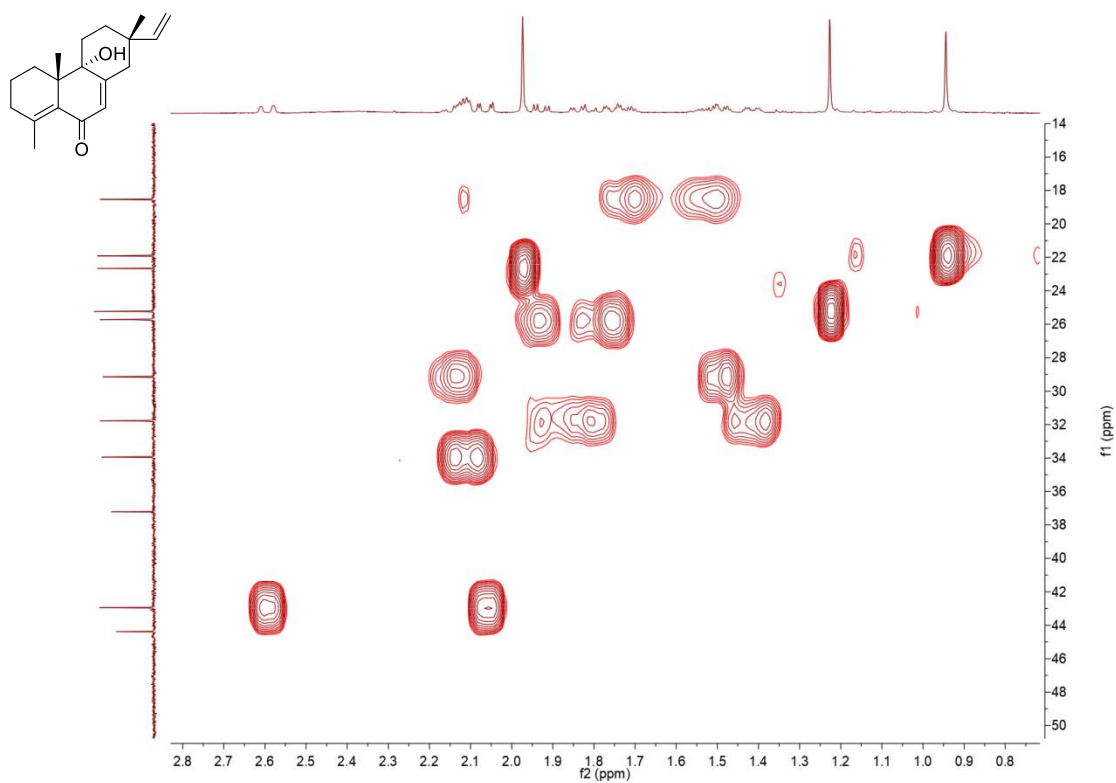

**Figure S55.** Enlarged HSQC (600 MHz) spectrum of **5** in  $\text{CDCl}_3$ .

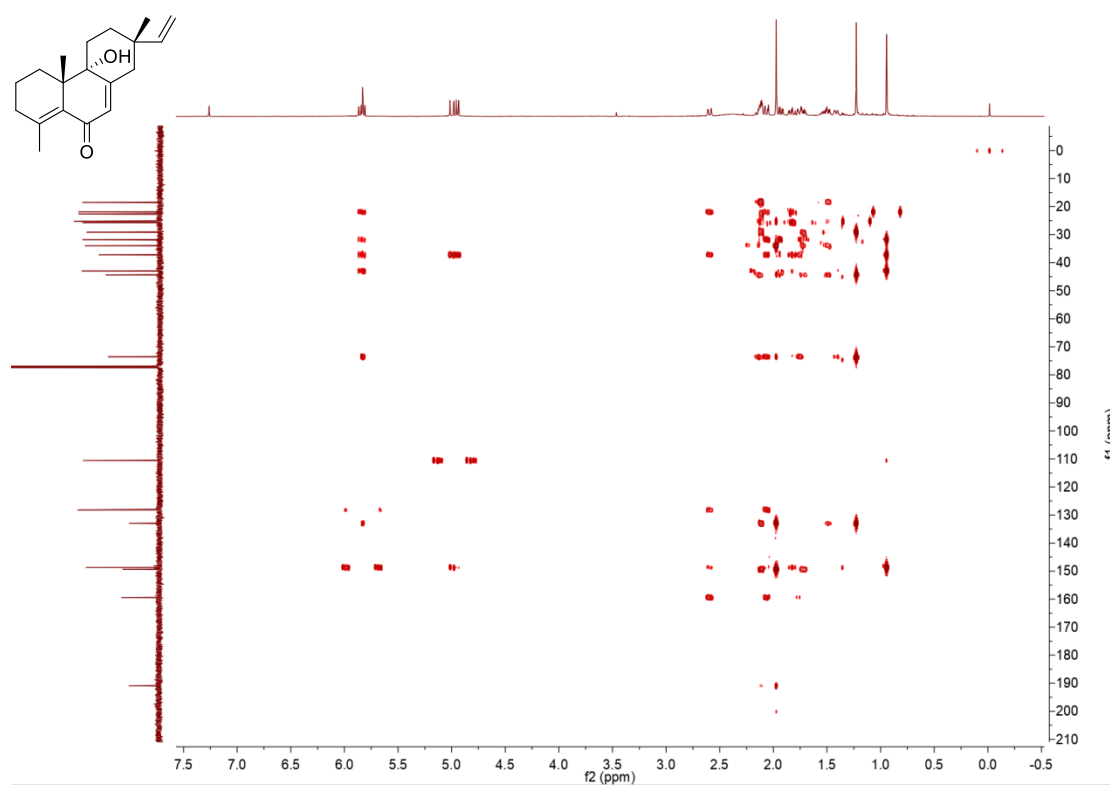

**Figure S56.** HMBC (600 MHz) spectrum of **5** in  $\text{CDCl}_3$ .

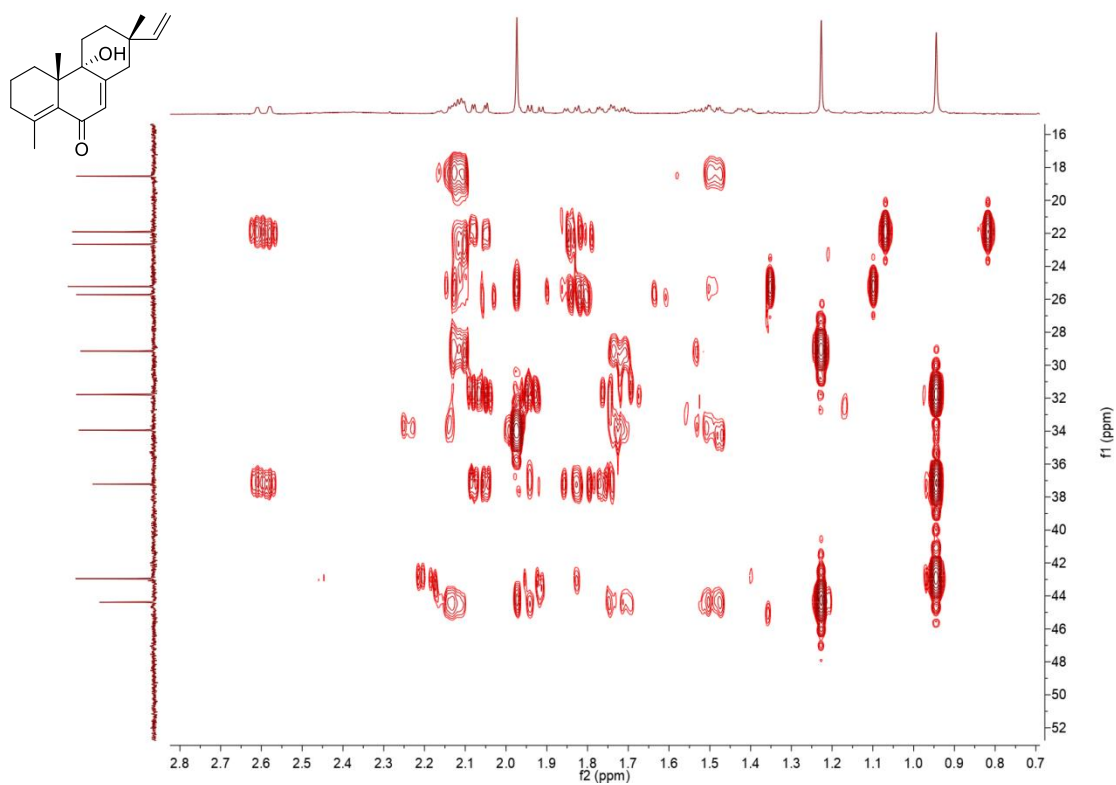

**Figure S57.** Enlarged HMBC (600 MHz) spectrum of **5** in CDCl<sub>3</sub>.

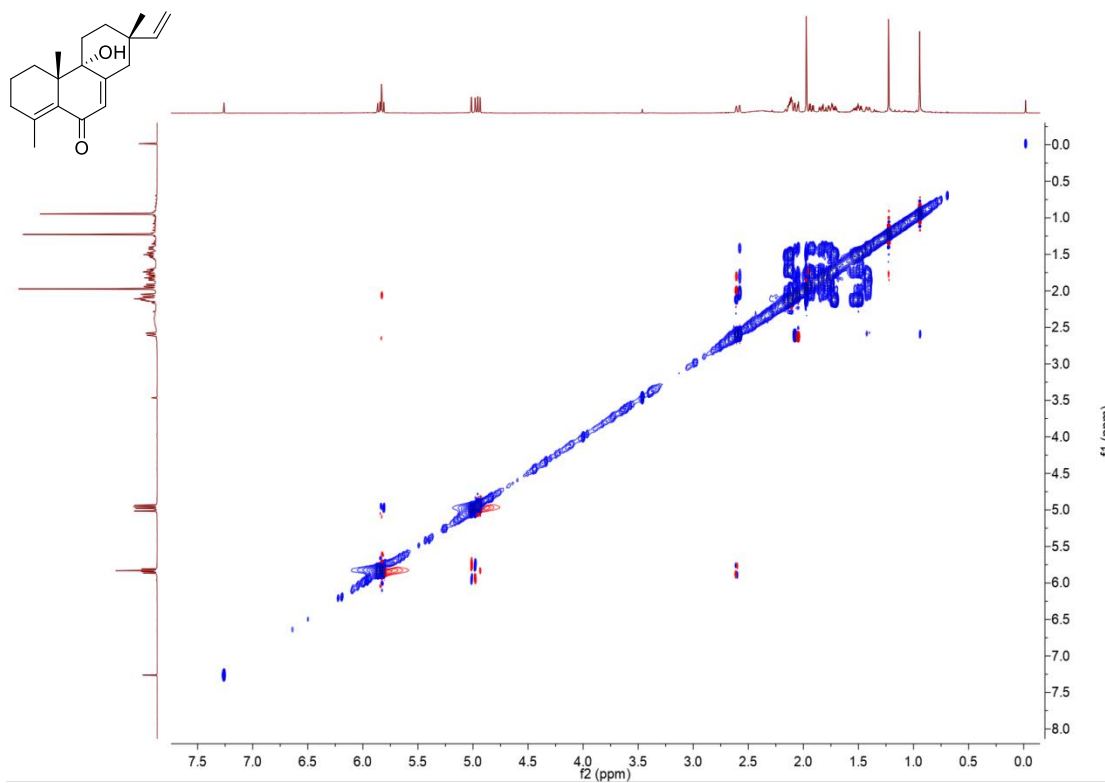

**Figure S58.** ROESY (600 MHz) spectrum of **5** in CDCl<sub>3</sub>.

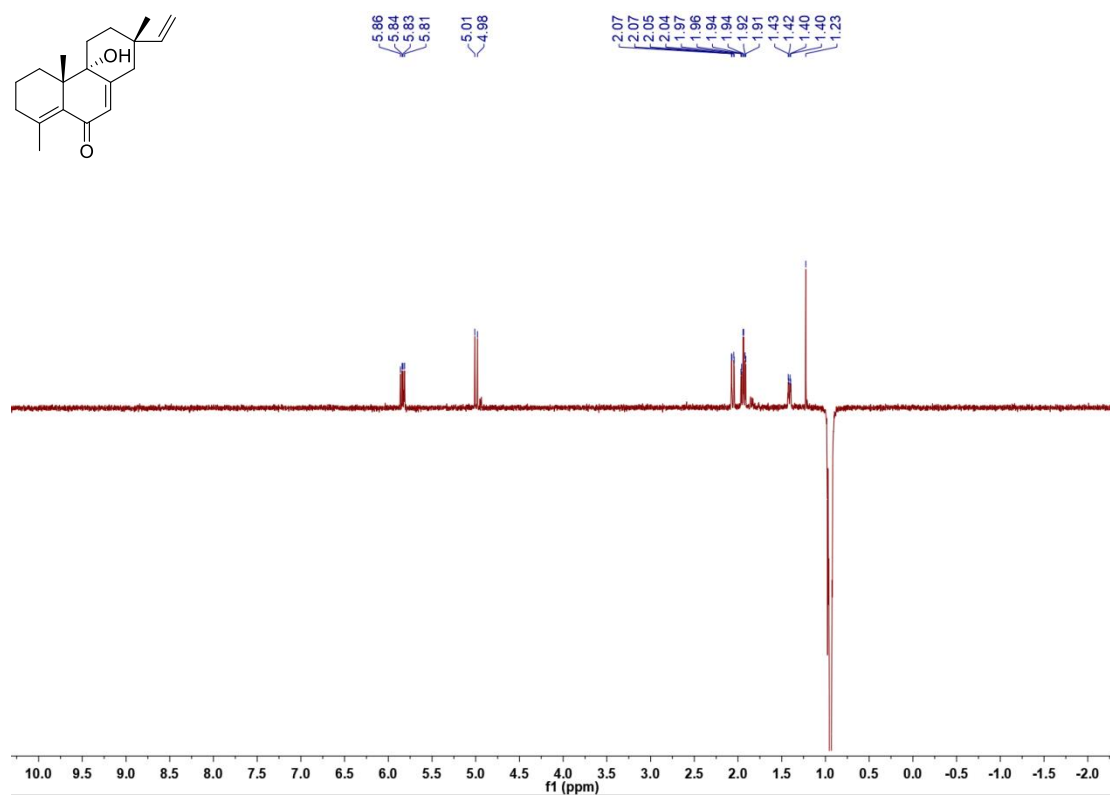

**Figure S59.** NOE irradiation spectrum (freq: 0.94 ppm) of compound **5** in CDCl<sub>3</sub>.

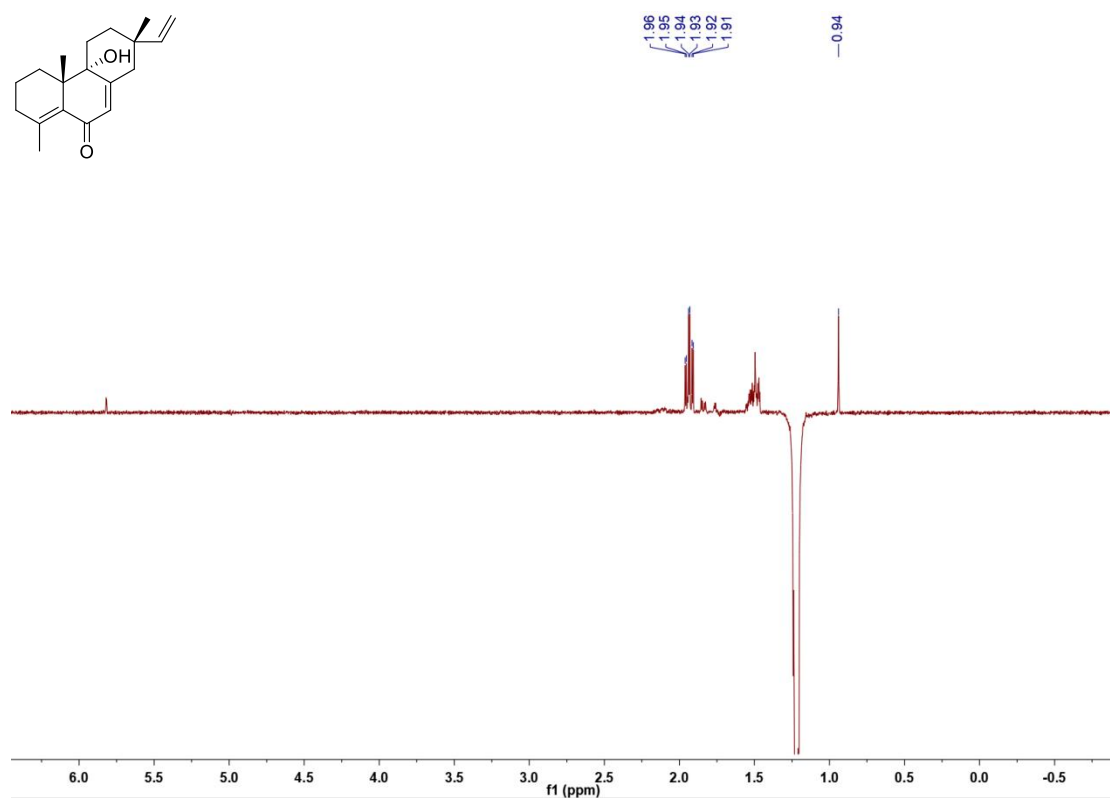

**Figure S60.** NOE irradiation spectrum (freq: 1.23 ppm) of compound **5** in CDCl<sub>3</sub>.

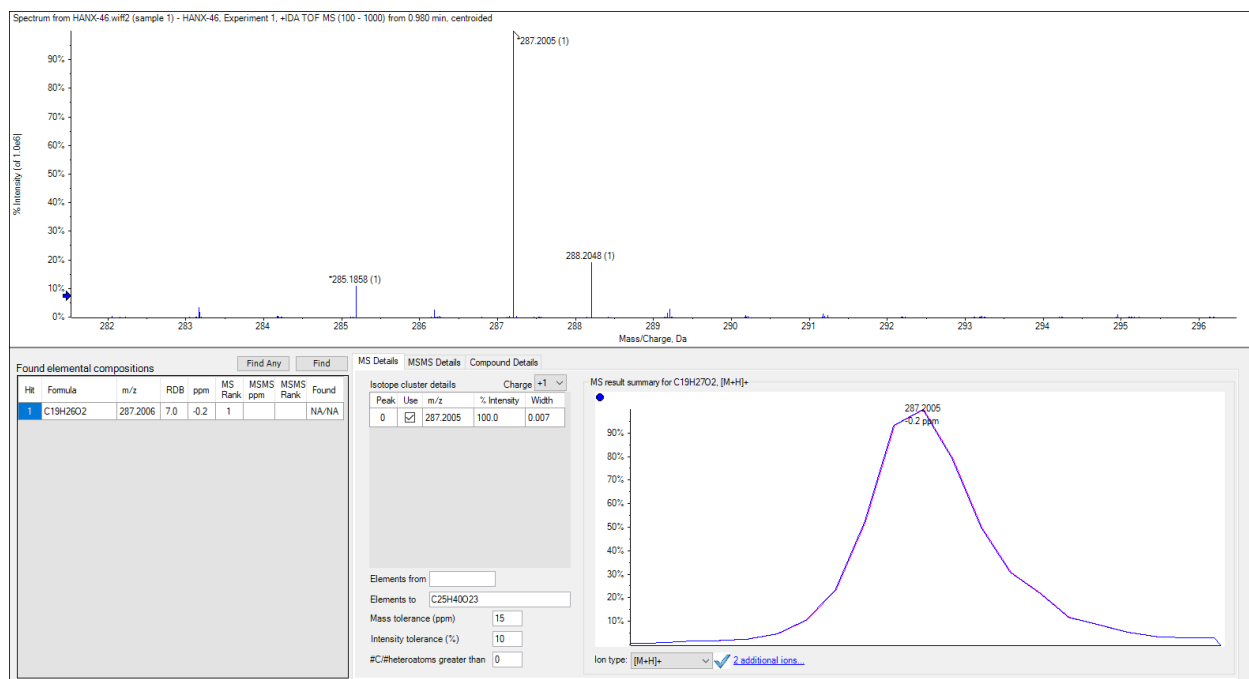

**Figure S61.** HRESIMS of **5**.

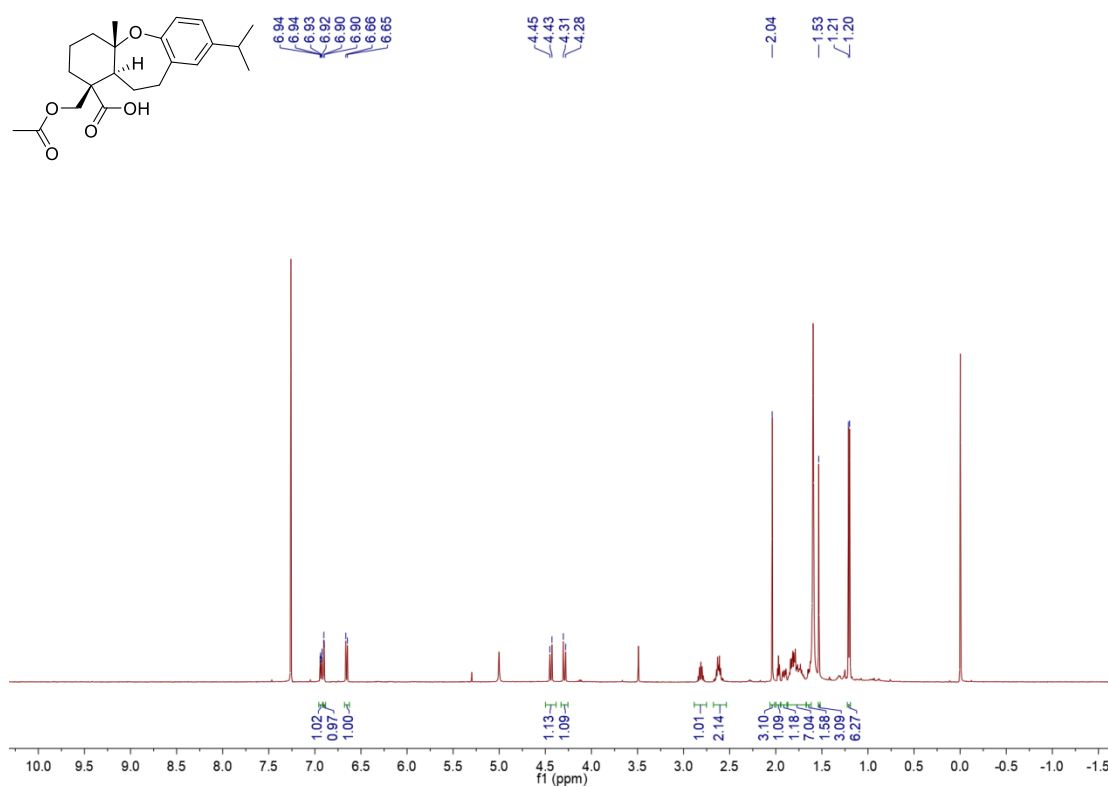

**Figure S62.** <sup>1</sup>H NMR (600 MHz) spectrum of **6** in CDCl<sub>3</sub>.

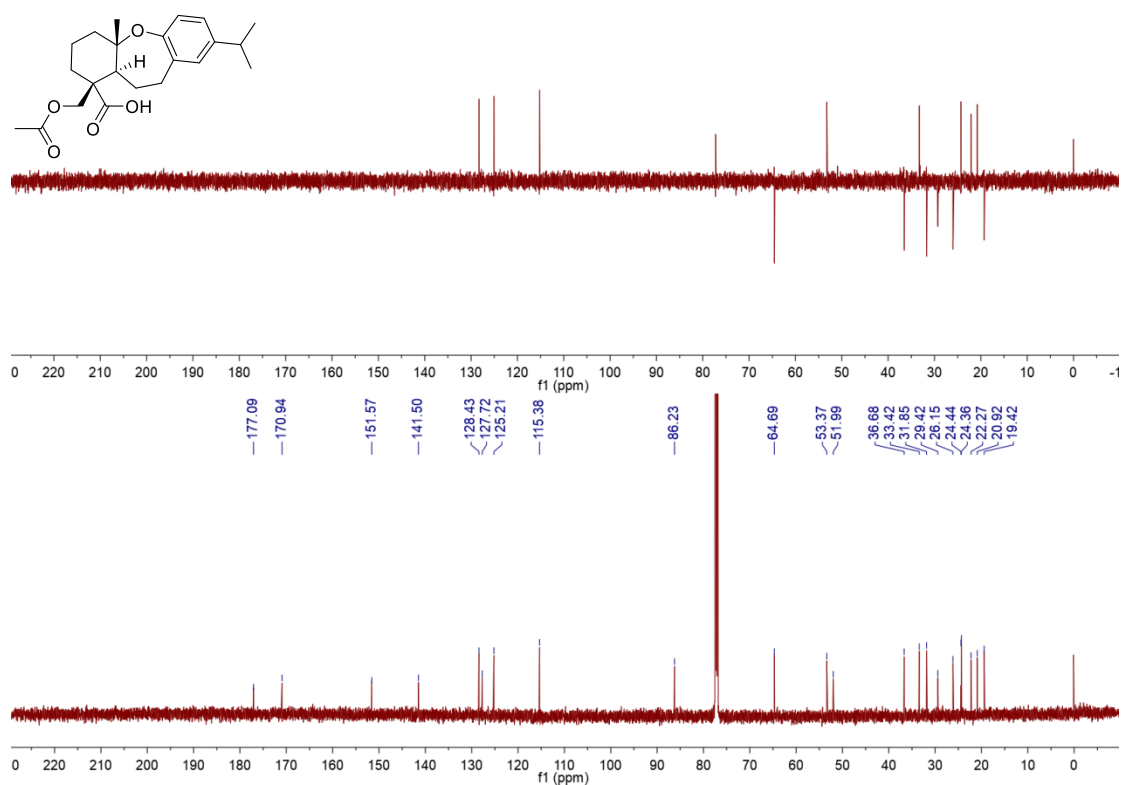

**Figure S63.** <sup>13</sup>C NMR and DEPT (150 MHz) spectra of **6** in CDCl<sub>3</sub>.

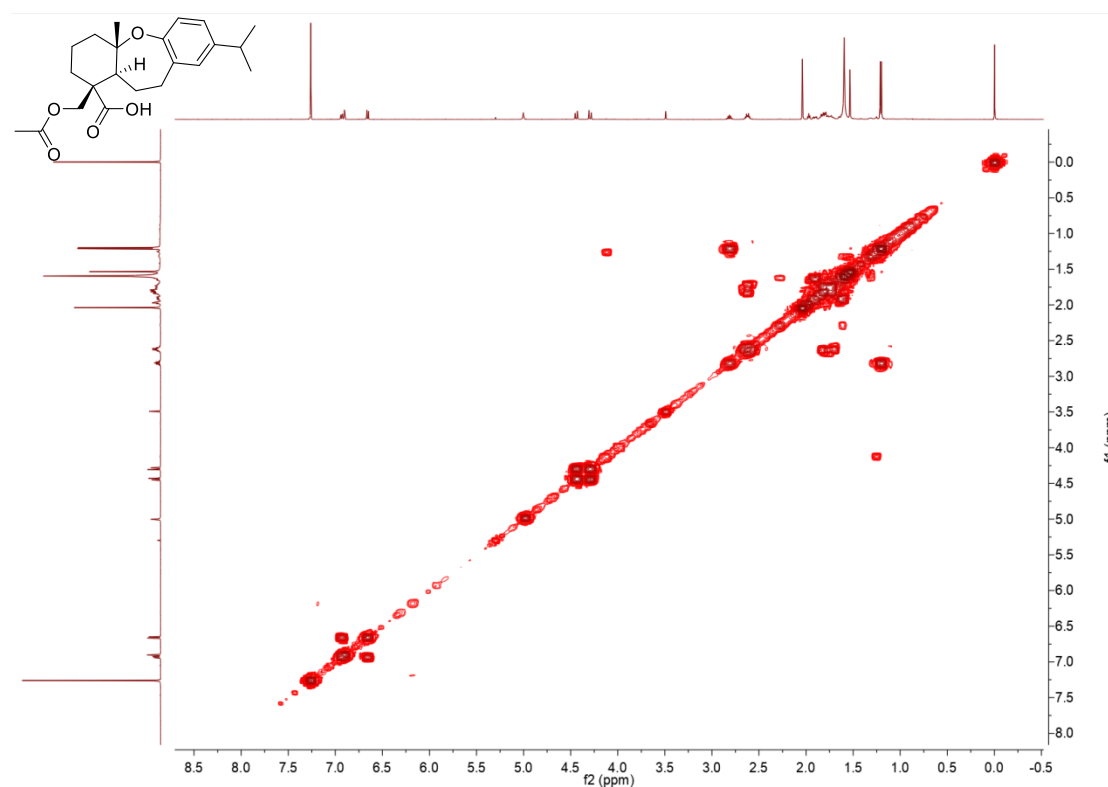

**Figure S64.** <sup>1</sup>H-<sup>1</sup>H COSY (600 MHz) spectrum of **6** in CDCl<sub>3</sub>.



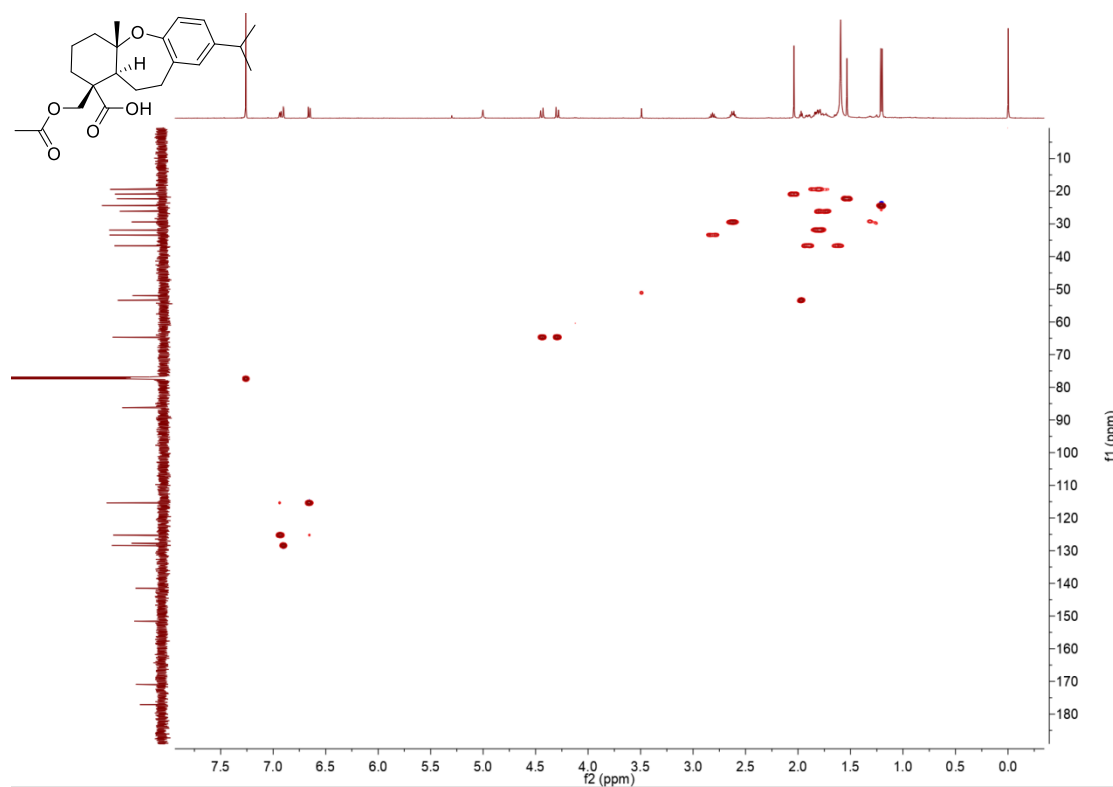

**Figure S65.** HSQC (600 MHz) spectrum of **6** in  $\text{CDCl}_3$ .

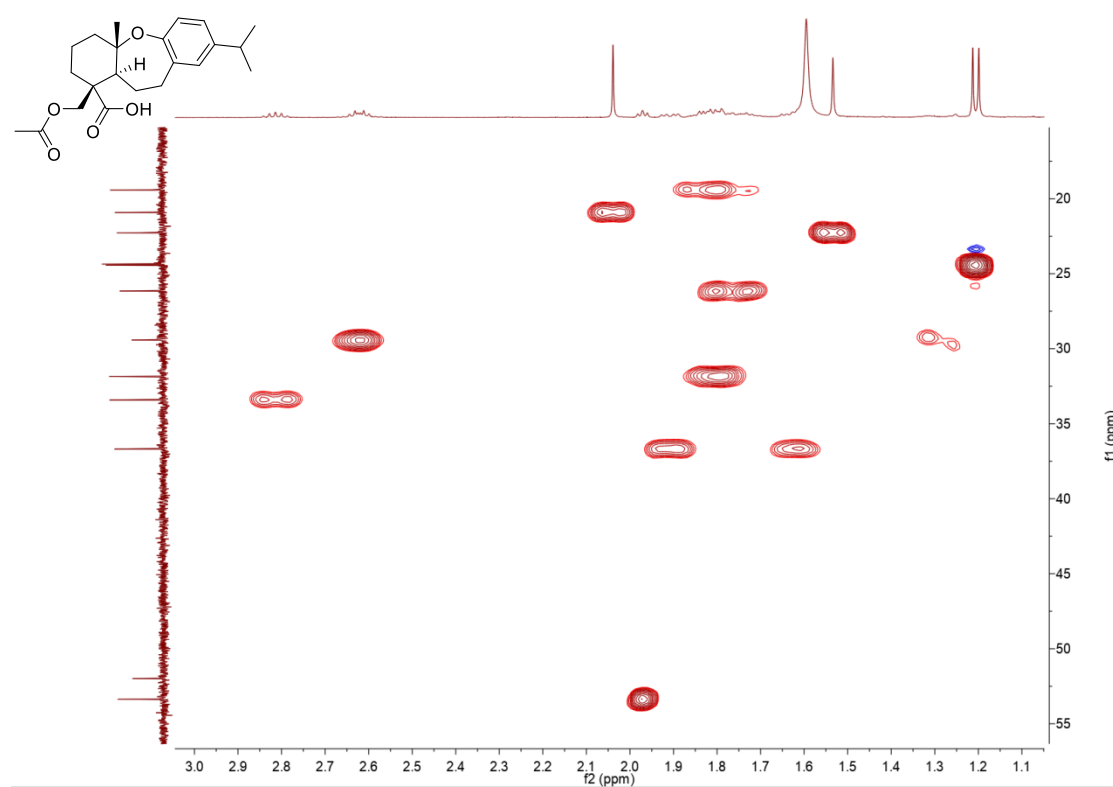

**Figure S66.** Enlarged HSQC (600 MHz) spectrum of **6** in  $\text{CDCl}_3$ .

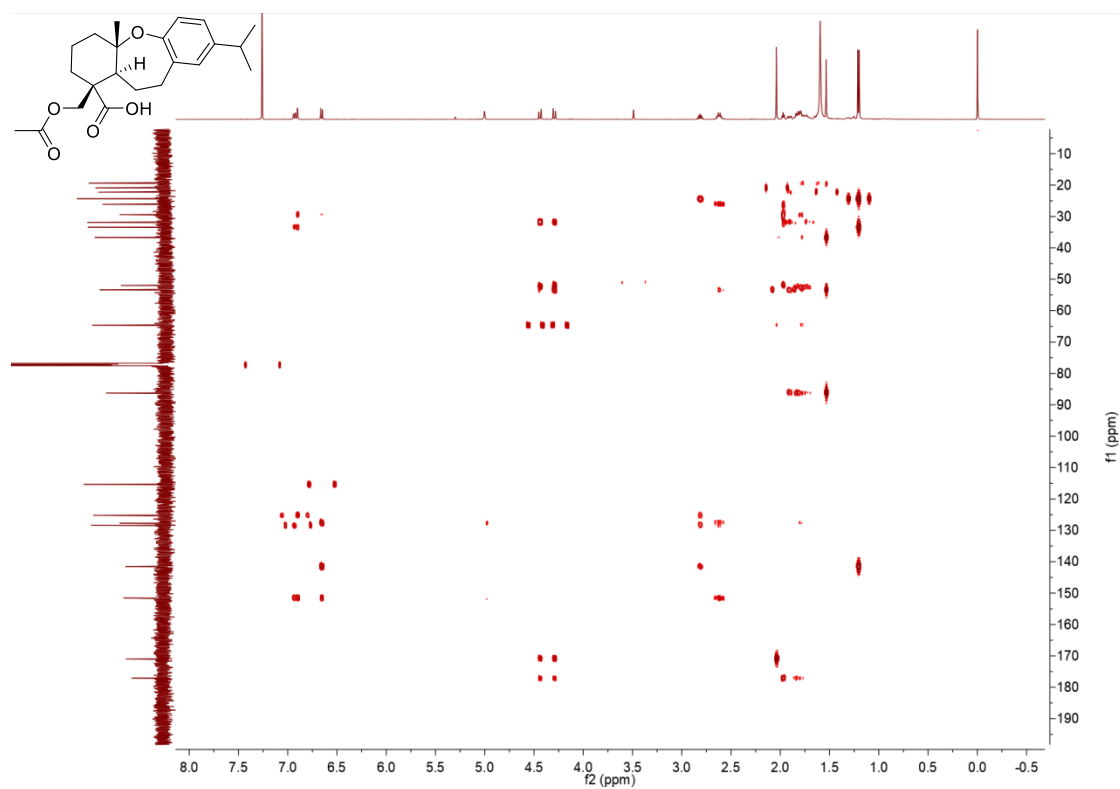

**Figure S67.** HMBC (600 MHz) spectrum of **6** in  $\text{CDCl}_3$ .

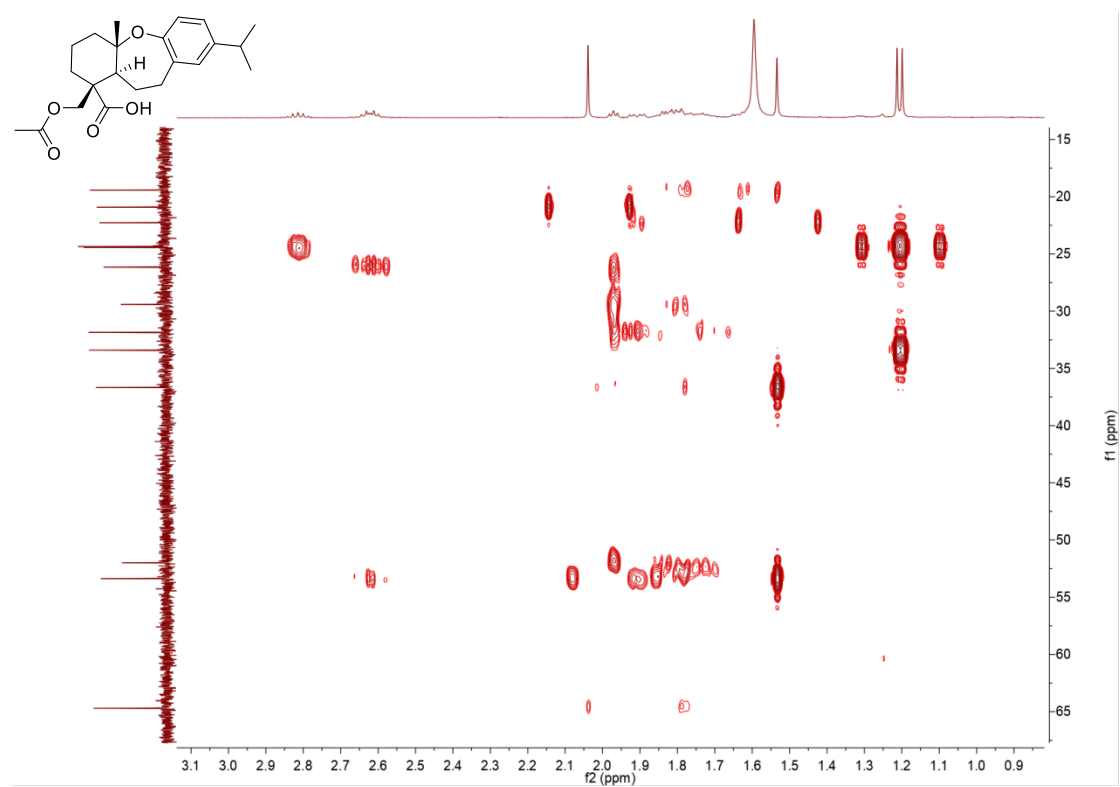

**Figure S68.** Enlarged HMBC (600 MHz) spectrum of **6** in  $\text{CDCl}_3$ .



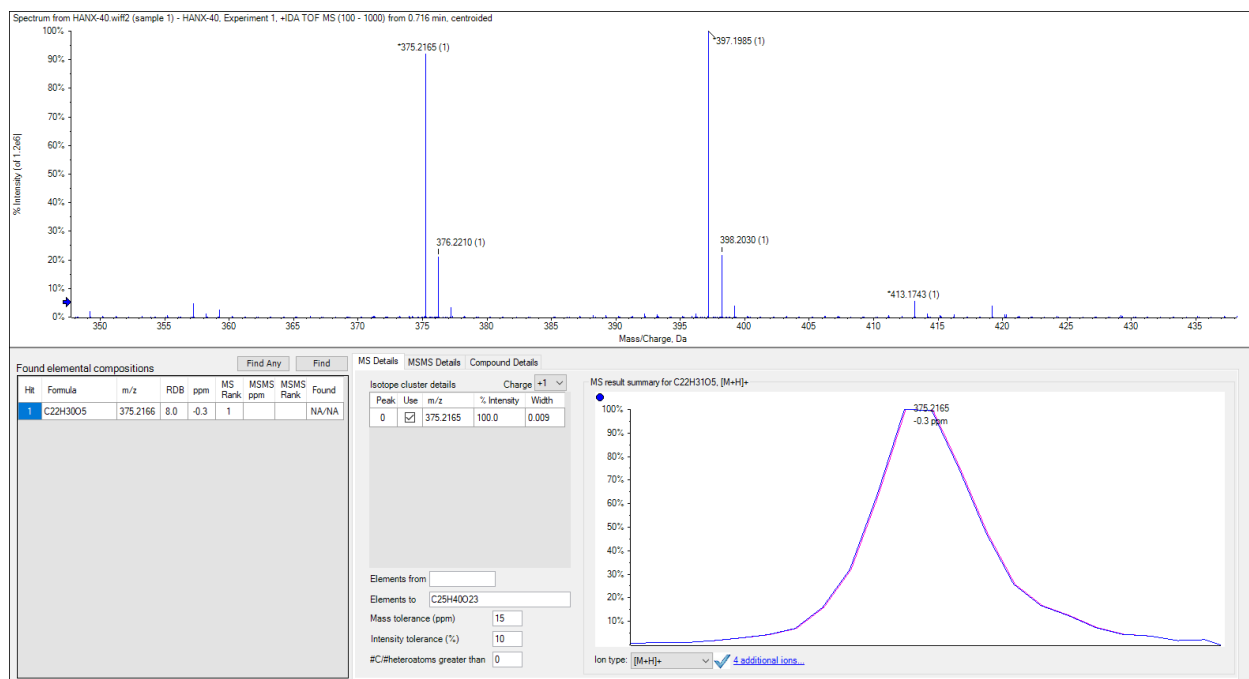

**Figure S71.** HRESIMS of **6**.

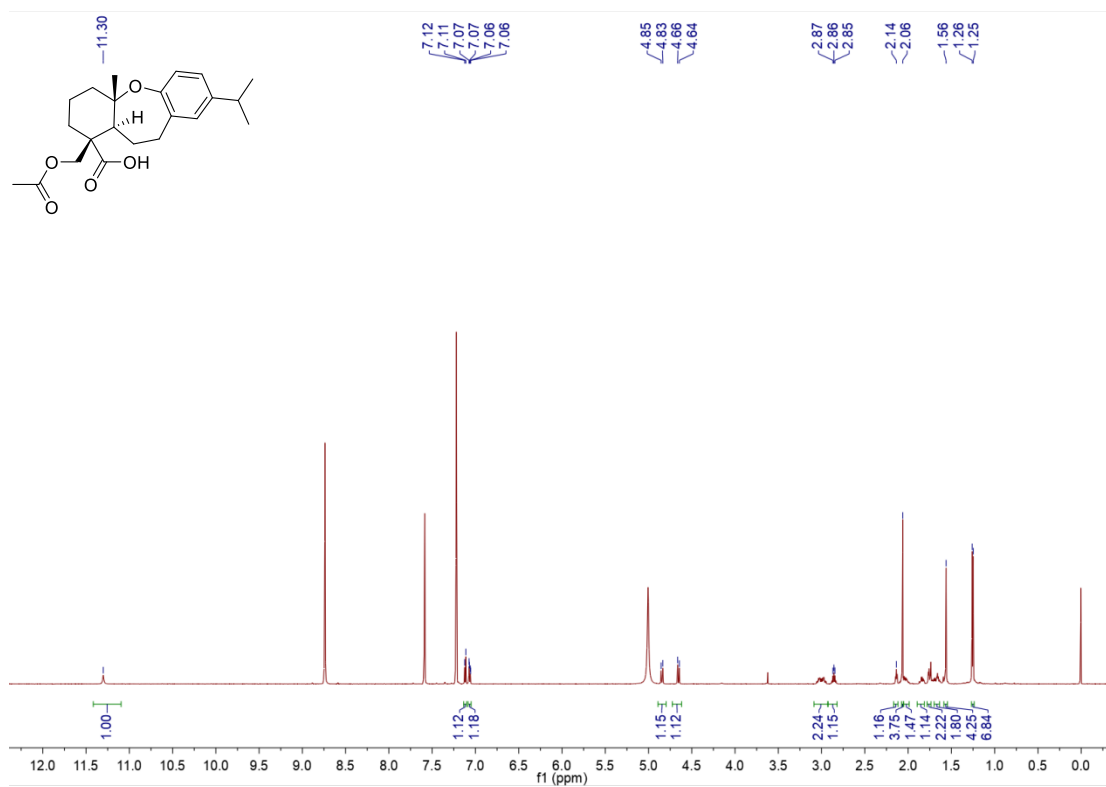

**Figure S72.** <sup>1</sup>H NMR (600 MHz) spectrum of **6** in pyridine-*d*<sub>5</sub>.

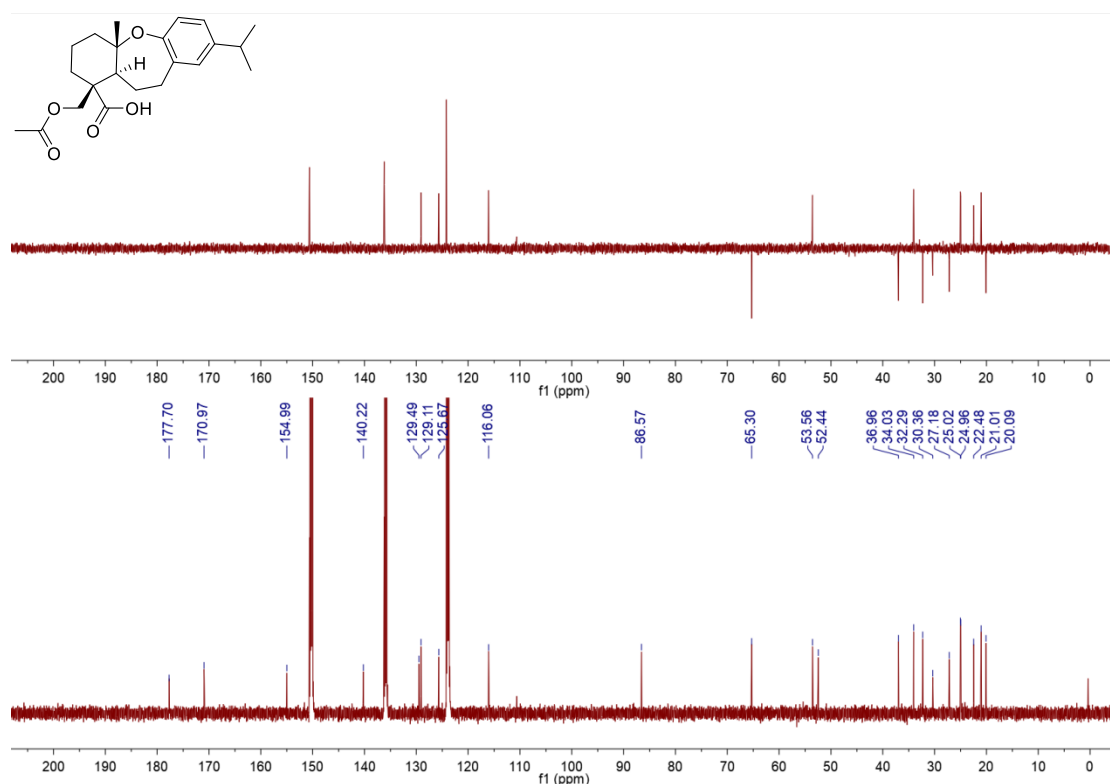

**Figure S73.**  $^{13}\text{C}$  NMR and DEPT (150 MHz) spectra of **6** in pyridine- $d_5$ .

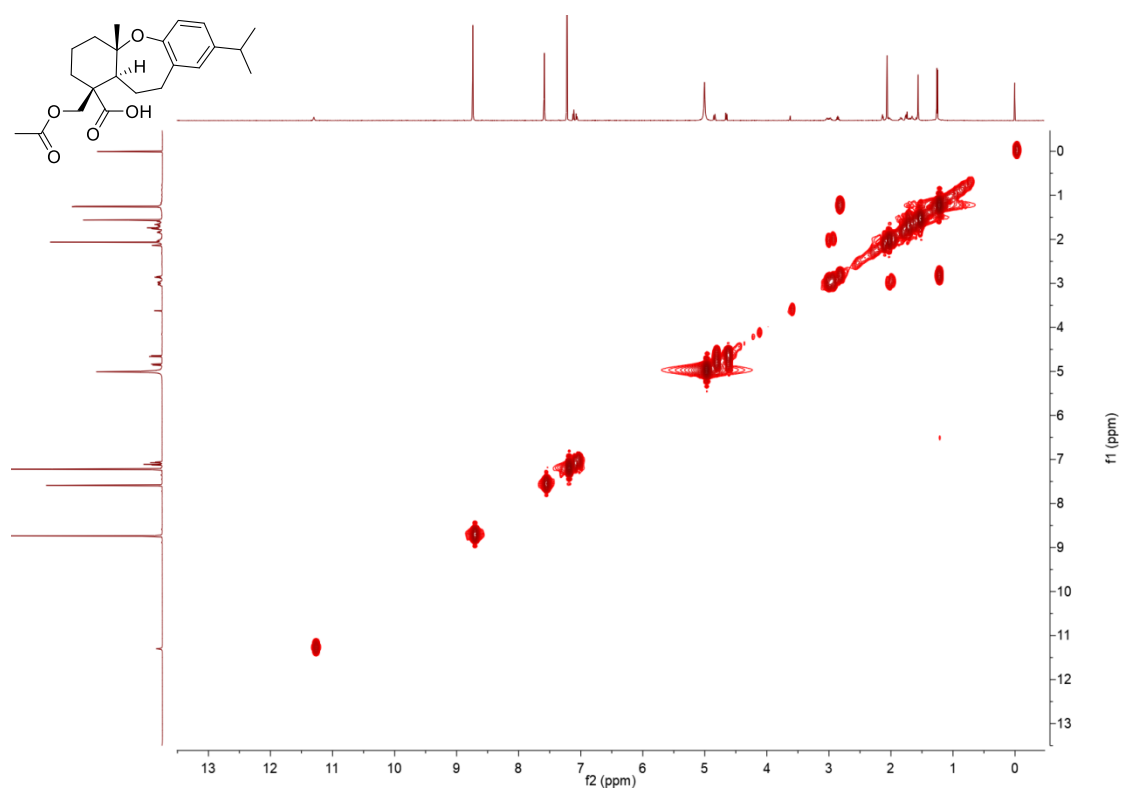

**Figure S74.**  $^1\text{H}$ - $^1\text{H}$  COSY (600 MHz) spectrum of **6** in pyridine- $d_5$ .

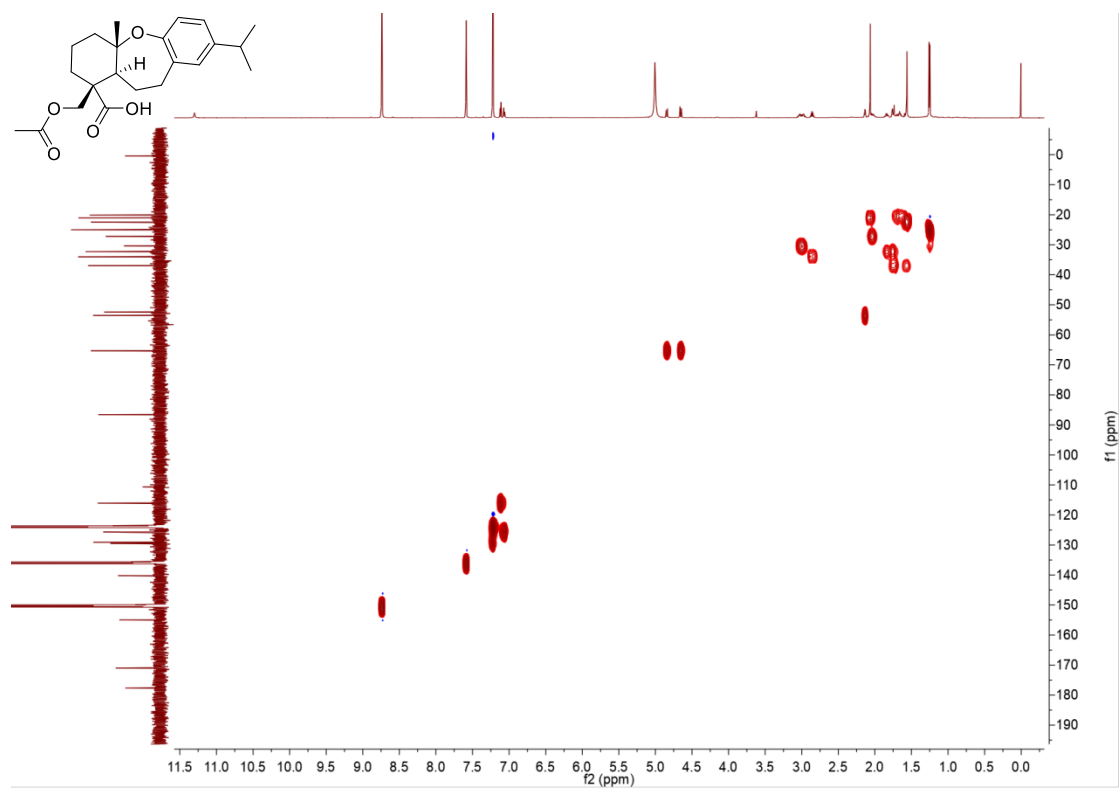

**Figure S75.** HSQC (600 MHz) spectrum of **6** in pyridine- $d_5$ .

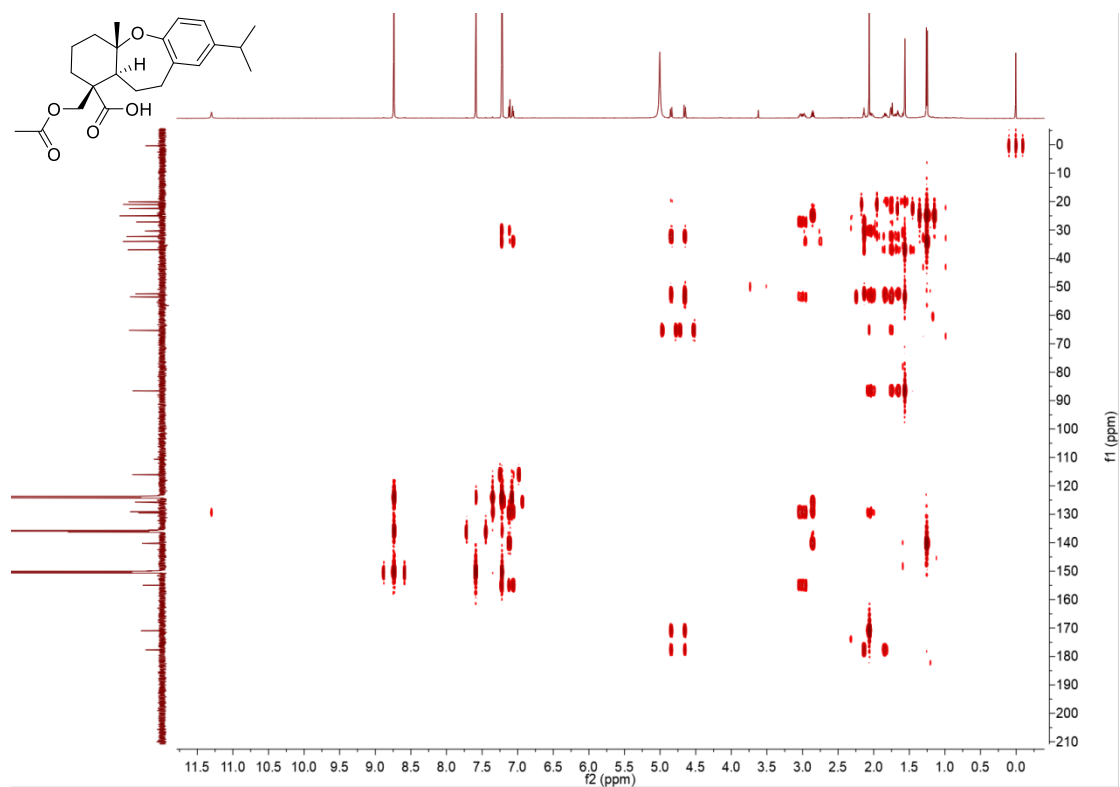

**Figure S76.** HMBC (600 MHz) spectrum of **6** in pyridine- $d_5$ .

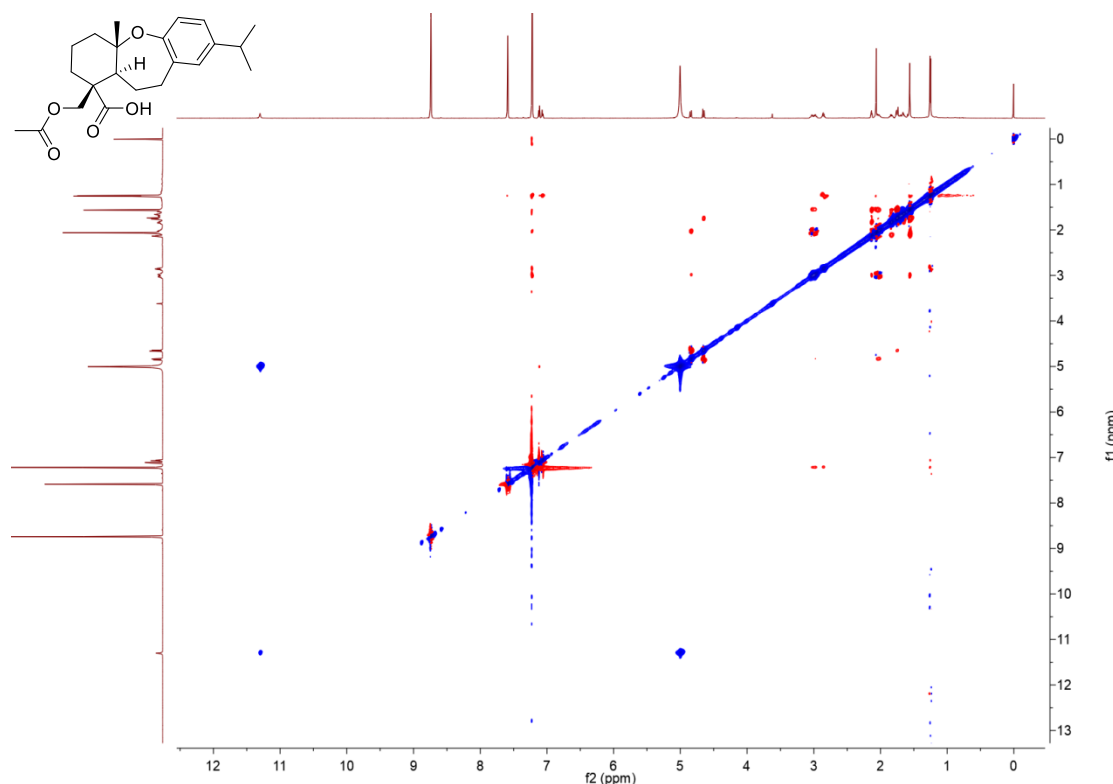

**Figure S77.** ROESY (600 MHz) spectrum of **6** in pyridine- $d_5$ .

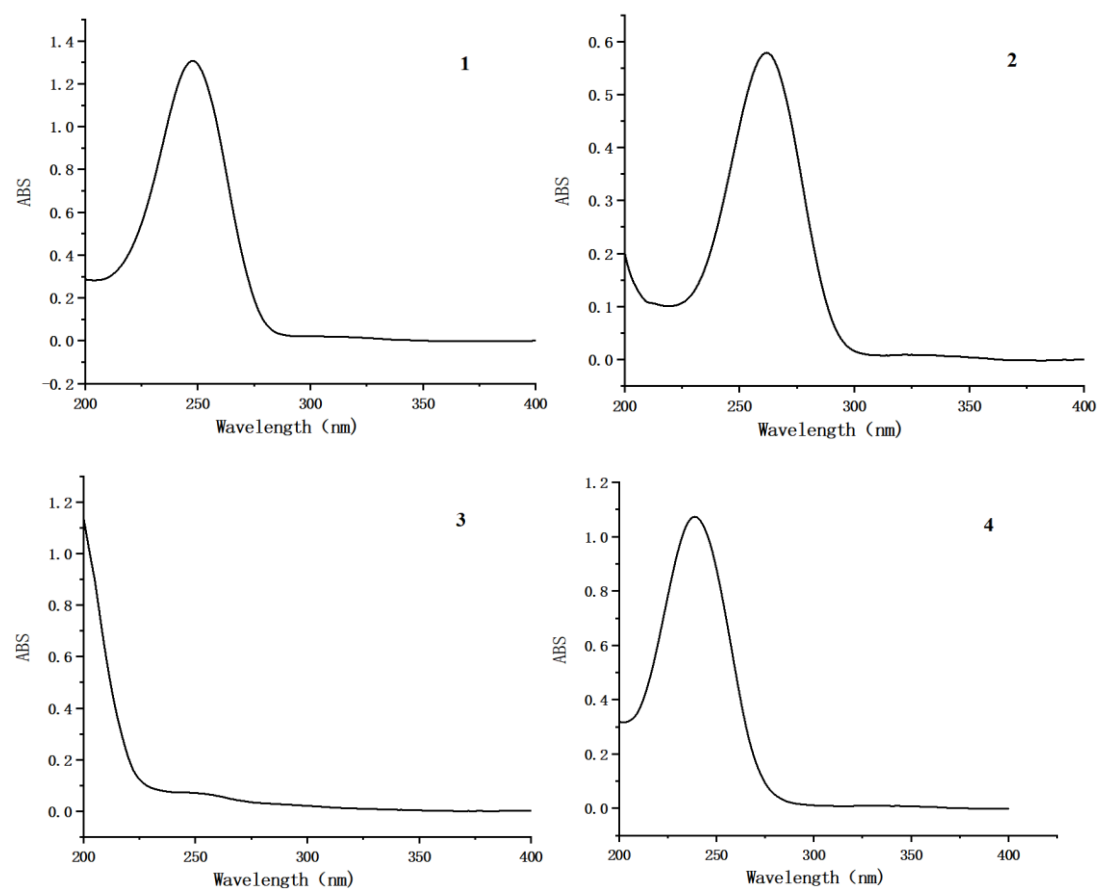

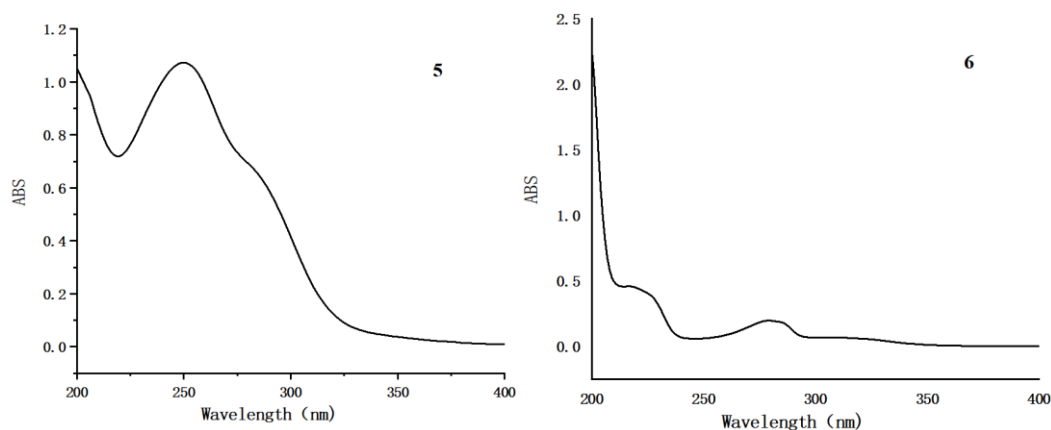

**Figure S78.** UV Spectra for compounds **1–6**.

**Table S10.** Crystal data and structure refinement for **1**

|                                             |                                                |
|---------------------------------------------|------------------------------------------------|
| Identification code                         | 1                                              |
| Empirical formula                           | C <sub>40</sub> H <sub>56</sub> O <sub>6</sub> |
| Formula weight                              | 632.84                                         |
| Temperature/K                               | 100.00(10)                                     |
| Crystal system                              | monoclinic                                     |
| Space group                                 | P21                                            |
| a/Å                                         | 6.35285(4)                                     |
| b/Å                                         | 16.48619(7)                                    |
| c/Å                                         | 16.53352(10)                                   |
| $\alpha$ /°                                 | 90                                             |
| $\beta$ /°                                  | 95.4460(5)                                     |
| $\gamma$ /°                                 | 90                                             |
| Volume/Å <sup>3</sup>                       | 1723.810(16)                                   |
| Z                                           | 2                                              |
| $\rho$ calc/g cm <sup>3</sup>               | 1.219                                          |
| $\mu$ /mm <sup>-1</sup>                     | 0.633                                          |
| F(000)                                      | 688.0                                          |
| Crystal size/mm <sup>3</sup>                | 0.15 × 0.12 × 0.1                              |
| Radiation                                   | Cu K $\alpha$ ( $\lambda$ = 1.54184)           |
| 2 $\theta$ range for data collection/°      | 5.37 to 148.784                                |
| Index ranges                                | -7 ≤ h ≤ 7, -20 ≤ k ≤ 20, -20 ≤ l ≤ 20         |
| Reflections collected                       | 32528                                          |
| Independent reflections                     | 6888 [Rint = 0.0241, Rsigma = 0.0184]          |
| Data/restraints/parameters                  | 6888/1/423                                     |
| Goodness-of-fit on F <sup>2</sup>           | 1.070                                          |
| Final R indexes [I ≥ 2 $\sigma$ (I)]        | R1 = 0.0286, wR2 = 0.0737                      |
| Final R indexes [all data]                  | R1 = 0.0315, wR2 = 0.0744                      |
| Largest diff. peak/hole / e Å <sup>-3</sup> | 0.12/-0.15                                     |
| Flack parameter                             | -0.03(5)                                       |

**Table S11.** Crystal data and structure refinement for **4**

|                     |                                                |
|---------------------|------------------------------------------------|
| Identification code | 4                                              |
| Empirical formula   | C <sub>38</sub> H <sub>56</sub> O <sub>8</sub> |



|                                                |                                        |
|------------------------------------------------|----------------------------------------|
| Formula weight                                 | 640.82                                 |
| Temperature/K                                  | 99.99(10)                              |
| Crystal system                                 | monoclinic                             |
| Space group                                    | P21                                    |
| a/Å                                            | 7.37143(4)                             |
| b/Å                                            | 12.23188(7)                            |
| c/Å                                            | 19.03670(10)                           |
| $\alpha/^\circ$                                | 90                                     |
| $\beta/^\circ$                                 | 93.1491(5)                             |
| $\gamma/^\circ$                                | 90                                     |
| Volume/Å <sup>3</sup>                          | 1713.879(16)                           |
| Z                                              | 2                                      |
| $\rho_{\text{calc}}/\text{cm}^3$               | 1.242                                  |
| $\mu/\text{mm}^{-1}$                           | 0.687                                  |
| F(000)                                         | 696.0                                  |
| Crystal size/mm <sup>3</sup>                   | 0.11 × 0.08 × 0.06                     |
| Radiation                                      | Cu K $\alpha$ ( $\lambda$ = 1.54184)   |
| 2 $\Theta$ range for data collection/ $^\circ$ | 4.648 to 148.642                       |
| Index ranges                                   | -9 ≤ h ≤ 9, -14 ≤ k ≤ 15, -23 ≤ l ≤ 23 |
| Reflections collected                          | 33252                                  |
| Independent reflections                        | 6840 [Rint = 0.0260, Rsigma = 0.0173]  |
| Data/restraints/parameters                     | 6840/1/443                             |
| Goodness-of-fit on F <sup>2</sup>              | 1.054                                  |
| Final R indexes [ $I \geq 2\sigma(I)$ ]        | R1 = 0.0278, wR2 = 0.0742              |
| Final R indexes [all data]                     | R1 = 0.0283, wR2 = 0.0746              |
| Largest diff. peak/hole / e Å <sup>-3</sup>    | 0.20/-0.21                             |
| Flack parameter                                | 0.01(3)                                |
